# Supplementary material for: Functional Genomic Analysis of the let-7 Regulatory Network in Caenorhabditis elegans
Source: PLoS Genet. 2013 Mar 14;9(3):e1003353. doi: 10.1371/journal.pgen.1003353 (PMC3597506; doi:10.1371/journal.pgen.1003353)
Supplement: Table S3 — Differential gene expression in let-7(n2853) versus lin-29(n333) worms. Sheet 1 shows the microarray results of mRNA expression in let-7(n2853) versus lin-29(n333) worms at the L4 stage. Sheets 2 and 3 show the results of DAVID analysis for genes up- or down-regulated in let-7(n2853) versus lin-29(n333), respectively. (XLS) [file pgen.1003353.s005.xls]

## Sheet: MICROARRAY LET-7 VS LIN-29
Supplemental Table 3. let-7(n2853) versus lin-29(n333) complete array results
probe1	fold change2	p-value3	Ensembl1	Gene Symbol1	Gene Title1
175583_s_at	4.288	0.00091	B0001.5	B0001.5 /// WBGene00007090	hypothetical protein /// status:Confirmed
175245_at	4.16994	0.015758	F53F4.5	fmo-4 /// WBGene00001479	Flavin-containing MonoOxygenase family /// locus:fmo-4
185929_at	3.95251	0.014685	F45D11.1	F45D11.1 /// WBGene00018448	hypothetical protein /// status:Partially_confirmed
191646_at	3.83047	0.0225	F53F4.5	fmo-4 /// WBGene00001479	Flavin-containing MonoOxygenase family /// locus:fmo-4
190454_at	3.2163	0.002958	Y45F10D.3	gly-10	GLYcosylation related
189864_s_at	3.01235	0.1855	F19C7.7	col-110 /// WBGene00000684	COLlagen /// locus:col-110
180410_at	2.77218	0.01659	Y39G8B.7	WBGene00012727 /// Y39G8B.7	status:Confirmed /// hypothetical protein
175239_at	2.68499	0.013505	F15E11.15	F15E11.15	hypothetical protein
174152_s_at	2.67099	0.16113	C09G5.6	bli-1 /// WBGene00000251	BLIstered cuticle /// locus:bli-1
186519_at	2.63175	0.016302	F15E11.12	F15E11.12 /// WBGene00017498	hypothetical protein /// status:Confirmed
172431_x_at	2.6263	0.021979	H12D21.1 /// H12D21.12 /// H12D21.13 /// W06A7.5 /// Y39G10AR.23 /// ZC412.6 /// ZC412.7	nspa-1 /// nspa-2 /// nspa-3 /// nspa-4 /// nspa-5 /// nspa-8 /// WBGene00010377 /// WBGene00012294 /// WBGene00013887 /// WBGene00013888 /// WBGene00044271 /// WBGene00044272	Nematode Specific Peptide family/group A /// Nematode Specific Peptide family/group A /// Nematode Specific Peptide family/group A /// Nematode Specific Peptide family/group A /// Nematode Specific Peptide family/group A /// Nematode Specific Peptide family/group A /// locus:nspa-1 /// locus:nspa-8 /// locus:nspa-5 /// locus:nspa-3 /// locus:nspa-2 /// locus:nspa-4
173105_at	2.5873	0.003238	C44B7.3	aff-1 /// WBGene00016625	Anchor cell Fusion Failure /// locus:aff-1
185071_at	2.56364	0.26723	F26D11.2	F26D11.2 /// WBGene00017819	hypothetical protein /// status:Partially_confirmed
193066_s_at	2.5622	0.018384	C30G4.3	gcy-11 /// WBGene00001537	Guanylyl CYclase /// locus:gcy-11
181091_at	2.50626	0.04023	Y69E1A.2	WBGene00013474 /// Y69E1A.2	status:Confirmed /// hypothetical protein
172934_x_at	2.48542	0.087523	K08F4.8	msp-38 /// WBGene00003434	Major Sperm Protein /// locus:msp-38
175093_at	2.48272	0.2146	C26B9.7	C26B9.7 /// WBGene00016136	hypothetical protein /// status:Confirmed
172593_x_at	2.45125	0.021219	F45D11.2 /// F45D11.3 /// F45D11.4	---	---
189250_at	2.37096	0.043533	ZC116.2	cyc-2.2 /// WBGene00013854	CYtochrome C /// locus:cyc-2.2
188947_at	2.35568	0.004411	T09F5.9	clec-47 /// WBGene00011668	C-type LECtin /// locus:clec-47
185601_s_at	2.35469	0.001993	F45D11.2 /// F45D11.3 /// F45D11.4	---	---
172938_x_at	2.32541	0.071734	ZK1251.6	msp-76 /// WBGene00003463	Major Sperm Protein /// locus:msp-76
186649_s_at	2.30529	0.023168	F36H12.11 /// R13H9.1	rmd-4 /// rmd-6 /// WBGene00018125 /// WBGene00020070	Regulator of Microtubule Dynamics /// Regulator of Microtubule Dynamics /// locus:rmd-4 /// locus:rmd-6
172906_x_at	2.28212	0.077778	K07F5.1 /// T13F2.10	msp-79 /// WBGene00003466 /// WBGene00003467	Major Sperm Protein /// locus:msp-79 /// locus:msp-81
172265_x_at	2.27833	0.049411	C47A4.5	C47A4.5 /// WBGene00008125	hypothetical protein /// status:Partially_confirmed
172857_x_at	2.24089	0.049434	F36H12.7	msp-19 /// WBGene00003426	Major Sperm Protein /// locus:msp-19
172852_x_at	2.20823	0.07037	K07F5.2 /// K07F5.3	msp-10 /// WBGene00003425 /// WBGene00003449	Major Sperm Protein /// locus:msp-10 /// locus:msp-56
172418_x_at	2.1887	0.057586	F47B3.4 /// F47B3.5	F47B3.4 /// F47B3.5 /// WBGene00018528 /// WBGene00018529	hypothetical protein /// hypothetical protein /// status:Partially_confirmed /// status:Predicted
172629_x_at	2.18448	0.043886	Y59E9AR.1 /// Y59E9AR.7	WBGene00021997 /// WBGene00022002 /// Y59E9AR.1 /// Y59E9AR.7	status:Predicted /// status:Partially_confirmed /// hypothetical protein /// hypothetical protein
180425_s_at	2.16708	0.02821	F15E6.3	F15E6.3 /// WBGene00017484	hypothetical protein /// status:Confirmed
172928_x_at	2.15558	0.056336	C09B9.6 /// R13H9.2 /// ZK354.5	msp-51 /// msp-55 /// msp-57 /// WBGene00003444 /// WBGene00003448 /// WBGene00003450	Major Sperm Protein /// Major Sperm Protein /// Major Sperm Protein /// locus:msp-51 /// locus:msp-55 /// locus:msp-57
172704_x_at	2.15519	0.045512	E03H12.10 /// T28H11.6	ssp-11 /// ssp-9 /// WBGene00006038 /// WBGene00006040	Sperm-Specific family, class P /// Sperm-Specific family, class P /// locus:ssp-9 /// locus:ssp-11
190687_s_at	2.14939	0.037533	C39H7.1 /// Y38H8A.3	C39H7.1 /// WBGene00012637 /// WBGene00016541 /// Y38H8A.3	hypothetical protein /// serine/threonine kinase /// casein kinase /// hypothetical protein
172887_x_at	2.13186	0.063467	ZK1248.6	msp-64 /// WBGene00003457	Major Sperm Protein /// locus:msp-64
184846_at	2.12082	0.036173	B0205.10	B0205.10 /// WBGene00015024	hypothetical protein /// status:Confirmed
190808_at	2.11424	0.010807	ZK507.3	WBGene00013979 /// ZK507.3	Protein kinase domain /// hypothetical protein
178439_s_at	2.1089	0.042156	F17C8.7 /// R07E5.15 /// T23F11.2	F17C8.7 /// R07E5.15 /// T23F11.2 /// WBGene00008912 /// WBGene00011120 /// WBGene00011954	hypothetical protein /// hypothetical protein /// hypothetical protein /// status:Partially_confirmed /// status:Confirmed /// status:Confirmed
172725_x_at	2.10377	0.082182	R05F9.3	msp-32 /// WBGene00003430	Major Sperm Protein /// locus:msp-32
186453_at	2.1009	0.020608	ZK1248.5	WBGene00022876 /// ZK1248.5	status:Partially_confirmed /// hypothetical protein
175403_s_at	2.09582	0.053764	K02C4.2	K02C4.2 /// WBGene00010501	hypothetical protein /// status:Confirmed
192822_s_at	2.09374	0.029699	T13A10.11	tag-32	Temporarily Assigned Gene name
172146_x_at	2.09023	0.008448	F38H4.6 /// R05D3.5 /// ZC262.1	F38H4.6 /// R05D3.5 /// WBGene00009550 /// WBGene00019879 /// WBGene00022578 /// ZC262.1	hypothetical protein /// hypothetical protein /// status:Confirmed /// status:Predicted /// status:Predicted /// hypothetical protein
172854_x_at	2.08798	0.070676	F32B6.6	msp-77 /// WBGene00003464	Major Sperm Protein /// locus:msp-77
172569_x_at	2.07411	0.072875	C24D10.7 /// C24D10.8	nspd-3 /// WBGene00016058 /// WBGene00043147	Nematode Specific Peptide family, group D /// locus:nspd-3 /// locus:nspd-6
172927_x_at	2.06681	0.070735	ZK354.1	msp-65 /// WBGene00003458	Major Sperm Protein /// locus:msp-65
188391_at	2.05734	0.065748	F59E12.12	bli-2 /// WBGene00000252	BLIstered cuticle /// locus:bli-2
180424_at	2.05203	0.025208	F15E6.3	F15E6.3 /// WBGene00017484	hypothetical protein /// status:Confirmed
172798_x_at	2.05	0.057802	ZK546.3	WBGene00022760 /// ZK546.3	Major sperm protein /// hypothetical protein
191614_s_at	2.04579	0.012837	C29E6.3 /// ZK809.1	pph-2 /// WBGene00004084 /// WBGene00014085 /// ZK809.1	Protein PHosphatase /// locus:pph-2 /// protein-tyrosine phosphatase /// hypothetical protein
172905_x_at	2.03481	0.089914	T13F2.11	msp-78 /// WBGene00003465	Major Sperm Protein /// locus:msp-78
172486_x_at	2.02661	0.073745	T23B7.1	nspd-4 /// WBGene00020715	Nematode Specific Peptide family, group D /// locus:nspd-4
192232_at	2.02518	0.024707	C49C8.1	C49C8.1 /// WBGene00016765	hypothetical protein /// serine/threonine-protein kinase
172925_x_at	2.02369	0.058985	ZK354.11	msp-59 /// WBGene00003452	Major Sperm Protein /// locus:msp-59
184685_s_at	2.02101	0.070071	C48E7.7 /// T08B2.12	C48E7.7 /// T08B2.12 /// WBGene00016752 /// WBGene00020350	hypothetical protein /// hypothetical protein /// status:Confirmed /// status:Confirmed
172714_x_at	2.0206	0.092292	R05F9.13	msp-31 /// WBGene00003429	Major Sperm Protein /// locus:msp-31
172922_x_at	2.00667	0.071001	ZK354.1 /// ZK354.4	msp-113 /// WBGene00003458 /// WBGene00003468	Major Sperm Protein /// locus:msp-65 /// locus:msp-113
180889_at	2.00181	0.044628	T17H7.1	T17H7.1 /// WBGene00020550	hypothetical protein /// status:Partially_confirmed
172527_x_at	1.99273	0.065224	C24D10.7 /// C24D10.8	nspd-6 /// WBGene00016058 /// WBGene00043147	Nematode Specific Peptide family, group D /// locus:nspd-3 /// locus:nspd-6
172903_x_at	1.98668	0.060685	C09B9.6	msp-55 /// WBGene00003448	Major Sperm Protein /// locus:msp-55
177672_at	1.98634	0.080128	T23F6.5	T23F6.5 /// WBGene00011952	hypothetical protein /// status:Partially_confirmed
189054_at	1.9846	0.055766	C39H7.1	C39H7.1 /// WBGene00016541	hypothetical protein /// casein kinase
188203_at	1.98273	0.028492	T27A3.3	ssp-16 /// WBGene00006044	Sperm-Specific family, class P /// locus:ssp-16
172770_x_at	1.98131	0.051393	R13H9.4	msp-53 /// WBGene00003446	Major Sperm Protein /// locus:msp-53
172476_x_at	1.97813	0.041101	R07E5.15	R07E5.15 /// WBGene00011120	hypothetical protein /// status:Confirmed
172893_x_at	1.978	0.072367	K07F5.1 /// T13F2.10	msp-81 /// WBGene00003466 /// WBGene00003467	Major Sperm Protein /// locus:msp-79 /// locus:msp-81
172546_x_at	1.96691	0.054746	F11G11.8 /// T23B7.1	nspd-5 /// WBGene00017386 /// WBGene00020715	Nematode Specific Peptide family, group D /// locus:nspd-5 /// locus:nspd-4
172853_x_at	1.96673	0.080311	C04G2.4	msp-36 /// WBGene00003432	Major Sperm Protein /// locus:msp-36
172907_x_at	1.9617	0.095902	K07F5.2 /// K07F5.3	msp-56 /// WBGene00003425 /// WBGene00003449	Major Sperm Protein /// locus:msp-10 /// locus:msp-56
174547_at	1.95908	0.15358	F19H8.4	F19H8.4 /// WBGene00008964	hypothetical protein /// status:Confirmed
184160_at	1.95859	0.000907	C04F12.9	rnh-1.3 /// WBGene00007303	RNase H /// locus:rnh-1.3
190607_at	1.95791	0.042609	C09D4.3	C09D4.3 /// WBGene00015634	hypothetical protein /// SER/THR protein kinase
177160_at	1.95763	0.049324	Y38C1AA.7	WBGene00021398 /// Y38C1AA.7	status:Confirmed /// hypothetical protein
188282_at	1.9563	0.006496	Y46H3A.3	hsp-16.2 /// WBGene00002016	Heat Shock Protein /// locus:hsp-16.2
183437_at	1.95032	0.091752	F02C9.1	F02C9.1 /// WBGene00017172	hypothetical protein /// status:Partially_confirmed
179893_s_at	1.94609	0.039703	K06A5.2	K06A5.2 /// WBGene00019430	hypothetical protein /// status:Confirmed
177777_at	1.94176	0.071829	C04G2.9	C04G2.9 /// WBGene00007308	hypothetical protein /// status:Confirmed
179038_at	1.93825	0.056762	F26A3.5	F26A3.5 /// WBGene00009143	hypothetical protein /// status:Partially_confirmed
181270_at	1.93712	0.058192	F15E6.8	dct-7 /// WBGene00017488	DAF-16/FOXO Controlled, germline Tumor affecting /// locus:dct-7
178447_s_at	1.93701	0.032798	K08C9.2	K08C9.2 /// WBGene00010651	hypothetical protein /// status:Confirmed
194059_at	1.93659	0.069207	F08A8.2	F08A8.2 /// WBGene00008565	hypothetical protein /// ACYL-COENZYME A OXIDASE, PEROXISOMAL (EC 1.3.3.6) (PALMITOYL-COA OXIDASE) (AOX)
174223_s_at	1.93562	0.001323	T05A7.6	T05A7.6 /// WBGene00020223	hypothetical protein /// casein kinase
192306_s_at	1.93074	0.020073	K09B11.5	K09B11.5	hypothetical protein
172297_x_at	1.92015	0.030108	T23F11.2	T23F11.2 /// WBGene00011954	hypothetical protein /// status:Confirmed
189213_at	1.90958	0.11054	C56G2.5	C56G2.5 /// WBGene00016980	hypothetical protein /// Protein kinase
172882_x_at	1.90561	0.093929	F26G1.7	msp-3 /// WBGene00003424	Major Sperm Protein /// locus:msp-3
179783_at	1.90294	0.02628	C50D2.3	C50D2.3 /// WBGene00016807	hypothetical protein /// status:Partially_confirmed
177934_s_at	1.9011	0.074297	C06A1.6	C06A1.6 /// WBGene00007356	hypothetical protein /// status:Partially_confirmed
179199_at	1.89817	0.16985	T09F5.1	T09F5.1 /// WBGene00011665	hypothetical protein /// status:Confirmed
187390_at	1.88823	0.036207	C02F5.5	C02F5.5 /// WBGene00015348	hypothetical protein /// status:Confirmed
187924_s_at	1.88485	0.35029	F32B6.5	sss-1 /// WBGene00006056	Sperm-Specific family, class S /// locus:sss-1
172885_x_at	1.88025	0.078176	C34F11.4	msp-50 /// WBGene00003443	Major Sperm Protein /// locus:msp-50
183211_s_at	1.87731	0.046282	C04F12.7	C04F12.7 /// WBGene00007301	hypothetical protein /// status:Confirmed
193623_at	1.87568	0.036016	F21F3.3	F21F3.3 /// WBGene00017673	hypothetical protein /// protein-S isoprenylsysteine O-methyltransferase
172771_x_at	1.86954	0.065821	C09B9.6 /// R13H9.2 /// R13H9.4 /// ZK354.5	msp-57 /// WBGene00003444 /// WBGene00003446 /// WBGene00003448 /// WBGene00003450	Major Sperm Protein /// locus:msp-51 /// locus:msp-53 /// locus:msp-55 /// locus:msp-57
190608_s_at	1.86686	0.064418	C09D4.3	C09D4.3 /// WBGene00015634	hypothetical protein /// SER/THR protein kinase
178243_s_at	1.8636	0.055922	F32B6.4	F32B6.4 /// WBGene00009321	hypothetical protein /// status:Confirmed
191373_s_at	1.86167	0.004103	F35B12.2 /// F35B12.3	dhs-20 /// F35B12.3 /// WBGene00000983 /// WBGene00009383	DeHydrogenases, Short chain /// hypothetical protein /// locus:dhs-20 /// status:Confirmed
184202_at	1.861	0.020805	C35D10.2	C35D10.2 /// WBGene00016440	hypothetical protein /// status:Confirmed
182410_at	1.8609	0.015558	T10E9.4	T10E9.4 /// WBGene00020414	hypothetical protein /// status:Partially_confirmed
190686_at	1.85443	0.062461	Y38H8A.3	WBGene00012637 /// Y38H8A.3	serine/threonine kinase /// hypothetical protein
187654_s_at	1.84475	0.053462	F11G11.9	F11G11.9 /// WBGene00017387	hypothetical protein /// status:Partially_confirmed
172669_x_at	1.83947	0.10946	K07F5.9	ssp-10 /// WBGene00006039	Sperm-Specific family, class P /// locus:ssp-10
175677_s_at	1.83921	0.004801	---	lin-41	LIN-41A (lin-41A)
179981_at	1.83596	0.064463	K06A5.3	K06A5.3 /// WBGene00019431	hypothetical protein /// status:Partially_confirmed
181640_at	1.83403	0.010025	B0205.4	B0205.4 /// WBGene00015019	hypothetical protein /// status:Partially_confirmed
181585_at	1.83209	0.003833	C29F5.3	C29F5.3 /// WBGene00016212	hypothetical protein /// status:Predicted
185809_at	1.83142	0.026068	Y23B4A.2	WBGene00021268 /// Y23B4A.2	status:Confirmed /// hypothetical protein
172900_x_at	1.82864	0.09549	ZK546.6	msp-152 /// WBGene00003470	Major Sperm Protein /// locus:msp-152
175378_s_at	1.82785	0.033524	F53B1.6	F53B1.6 /// WBGene00018738	hypothetical protein /// status:Partially_confirmed
172334_x_at	1.82718	0.007512	C03G5.10 /// C03G5.11 /// C03G5.12 /// C03G5.13 /// C03G5.8 /// C03G5.9 /// F42F12.1 /// F42F12.10 /// F42F12.13 /// F42F12.6 /// F42F12.7 /// F42F12.8 /// F42F12.9	nspc-1 /// nspc-10 /// nspc-12 /// nspc-13 /// nspc-14 /// nspc-15 /// nspc-2 /// nspc-3 /// nspc-4 /// nspc-5 /// nspc-6 /// nspc-9 /// WBGene00009634 /// WBGene00009637 /// WBGene00009638 /// WBGene00009639 /// WBGene00009640 /// WBGene00023477 /// WBGene00023493 /// WBGene00044337 /// WBGene00044338 /// WBGene00044339 /// WBGene00044340 /// WBGene00044357	Nematode Specific Peptide family, group C /// Nematode Specific Peptide family, group C /// Nematode Specific Peptide family, group C /// Nematode Specific Peptide family, group C /// Nematode Specific Peptide family, group C /// Nematode Specific Peptide family, group C /// Nematode Specific Peptide family, group C /// Nematode Specific Peptide family, group C /// Nematode Specific Peptide famil…
174273_at	1.8243	0.15958	F01G10.9	F01G10.9 /// WBGene00008511	hypothetical protein /// status:Partially_confirmed
179960_at	1.82336	0.032577	C07G1.6	C07G1.6 /// WBGene00015572	hypothetical protein /// status:Partially_confirmed
171867_x_at	1.81869	0.079442	C09B9.6 /// F09C12.7 /// F26G1.8 /// F32B6.6 /// F36H12.6 /// F36H12.7 /// F59A6.8 /// R13H9.2 /// R13H9.4 /// T13F2.10 /// T13F2.11 /// W08D2.9 /// Y59E9AR.1 /// Y59E9AR.7 /// Y59H11AM.1 /// ZK354.1 /// ZK354.10 /// ZK354.11 /// ZK354.4 /// ZK354.5	msp-113 /// msp-19 /// msp-51 /// msp-53 /// msp-55 /// msp-57 /// msp-59 /// msp-65 /// msp-74 /// msp-77 /// msp-78 /// msp-79 /// WBGene00003426 /// WBGene00003444 /// WBGene00003446 /// WBGene00003448 /// WBGene00003450 /// WBGene00003452 /// WBGene00003458 /// WBGene00003462 /// WBGene00003464 /// WBGene00003465 /// WBGene00003466 /// WBGene00003468 /// WBGene00021997 /// WBGene00022002 /// …	Major Sperm Protein /// Major Sperm Protein /// Major Sperm Protein /// Major Sperm Protein /// Major Sperm Protein /// Major Sperm Protein /// Major Sperm Protein /// Major Sperm Protein /// Major Sperm Protein /// Major Sperm Protein /// Major Sperm Protein /// Major Sperm Protein /// locus:msp-19 /// locus:msp-51 /// locus:msp-53 /// locus:msp-55 /// locus:msp-57 /// locus:msp-59 /// locus:msp…
172381_x_at	1.81743	0.097052	ZK484.8	nspd-1 /// WBGene00022754	Nematode Specific Peptide family, group D /// locus:nspd-1
192797_s_at	1.81153	0.017274	F11A1.3	daf-12	abnormal DAuer Formation
191865_s_at	1.81133	0.030205	F35C11.2 /// M05D6.3	F35C11.2 /// protein-tyrosine-phosphatase /// WBGene00009401 /// WBGene00010876	hypothetical protein /// hypothetical protein /// protein-tyrosine phosphatase /// protein-tyrosine-phosphatase
185624_s_at	1.81041	0.061628	T28H11.7 /// ZC477.7	T28H11.7 /// WBGene00020905 /// WBGene00022621 /// ZC477.7	hypothetical protein /// status:Confirmed /// status:Confirmed /// hypothetical protein
178900_s_at	1.80725	0.012868	F45D3.4	F45D3.4	hypothetical protein
172752_x_at	1.80181	0.05488	ZC477.1	ssq-3 /// WBGene00006052	Sperm-Specific family, class Q /// locus:ssq-3
183141_at	1.80108	0.010584	W03A5.1	W03A5.1 /// WBGene00020966	hypothetical protein /// status:Partially_confirmed
189913_at	1.79953	0.043139	K09C4.1	K09C4.1	hypothetical protein
183275_at	1.79932	0.014687	F02C9.4	F02C9.4 /// WBGene00017175	hypothetical protein /// status:Partially_confirmed
172834_x_at	1.79883	0.077347	C33F10.9	msp-40 /// WBGene00003435	Major Sperm Protein /// locus:msp-40
175665_at	1.79317	0.000962	F11A1.3	daf-12	abnormal DAuer Formation
186678_s_at	1.78889	0.043979	C02B10.6 /// F36H12.10	C02B10.6 /// F36H12.10 /// WBGene00015331 /// WBGene00018124	hypothetical protein /// hypothetical protein /// status:Partially_confirmed /// status:Partially_confirmed
191006_s_at	1.78837	0.069735	W02B12.12	W02B12.12	hypothetical protein
188444_at	1.78714	0.004233	Y46H3A.2	hsp-16.41 /// WBGene00002018	Heat Shock Protein /// locus:hsp-16.41
177577_s_at	1.78695	0.061747	C04G2.8	C04G2.8 /// WBGene00007307	hypothetical protein /// status:Confirmed
177094_s_at	1.78458	0.015957	Y46C8AL.1	clec-73 /// WBGene00021579	C-type LECtin /// locus:clec-73
182717_at	1.78398	0.014739	F56B3.6	F56B3.6 /// WBGene00018930	hypothetical protein /// status:Partially_confirmed
182272_at	1.77698	0.013444	F45E4.6	F45E4.6 /// WBGene00018471	hypothetical protein /// status:Partially_confirmed
172811_x_at	1.77579	0.039133	C35E7.10	C35E7.10	hypothetical protein
172687_x_at	1.77499	0.092428	F09C12.7	msp-74 /// WBGene00003462	Major Sperm Protein /// locus:msp-74
190740_at	1.771	0.0363	C50F4.2	6-phosphofructokinase /// WBGene00008230	hypothetical protein /// 6-phosphofructokinase
180616_at	1.76893	0.053903	T22B7.3	T22B7.3 /// WBGene00020672	hypothetical protein /// status:Partially_confirmed
180297_at	1.76598	0.028686	C06A8.6	C06A8.6 /// WBGene00015516	hypothetical protein /// status:Confirmed
189419_at	1.76564	0.015321	F15B9.6	F15B9.6 /// WBGene00008850	hypothetical protein /// phospholipase A2
194216_x_at	1.76539	0.030224	C50E10.1	C50E10.1 /// WBGene00016825	hypothetical protein /// status:Confirmed
186976_s_at	1.76442	0.051768	Y116A8C.24 /// Y116A8C.38	WBGene00013801 /// WBGene00013811 /// Y116A8C.24 /// Y116A8C.38	status:Partially_confirmed /// status:Partially_confirmed /// hypothetical protein /// hypothetical protein
186628_at	1.76112	0.02919	Y38E10A.18	nhr-234 /// WBGene00012596	Nuclear Hormone Receptor family /// locus:nhr-234
180501_s_at	1.76028	0.073467	F44D12.4	F44D12.4 /// WBGene00009681	hypothetical protein /// status:Confirmed
172724_x_at	1.75747	0.07644	R05F9.8	msp-33 /// WBGene00003431	Major Sperm Protein /// locus:msp-33
172357_x_at	1.75366	0.004788	C03G5.10 /// C03G5.13 /// C03G5.9 /// F42F12.1 /// F42F12.10 /// F42F12.13 /// F42F12.6 /// F42F12.7 /// F42F12.8 /// F42F12.9	nspc-10 /// nspc-12 /// nspc-13 /// nspc-14 /// nspc-15 /// nspc-2 /// nspc-3 /// nspc-6 /// nspc-9 /// WBGene00009634 /// WBGene00009637 /// WBGene00009638 /// WBGene00009639 /// WBGene00009640 /// WBGene00023493 /// WBGene00044337 /// WBGene00044338 /// WBGene00044357	Nematode Specific Peptide family, group C /// Nematode Specific Peptide family, group C /// Nematode Specific Peptide family, group C /// Nematode Specific Peptide family, group C /// Nematode Specific Peptide family, group C /// Nematode Specific Peptide family, group C /// Nematode Specific Peptide family, group C /// Nematode Specific Peptide family, group C /// Nematode Specific Peptide famil…
172743_x_at	1.75178	0.11022	F58A6.9	F58A6.9 /// WBGene00019026	hypothetical protein /// major sperm protein
173344_at	1.74845	0.046351	Y54F10BM.3	WBGene00021858 /// Y54F10BM.3	status:Partially_confirmed /// hypothetical protein
172630_x_at	1.7458	0.091257	C35D10.11	C35D10.11 /// WBGene00016447	hypothetical protein /// status:Confirmed
172229_x_at	1.74352	0.064499	T16A9.5	T16A9.5 /// WBGene00011795	hypothetical protein /// status:Confirmed
171811_s_at	1.74131	0.030794	K01D12.15 /// K01D12.7	K01D12.15 /// K01D12.7 /// WBGene00010466 /// WBGene00010474	hypothetical protein /// hypothetical protein /// status:Confirmed /// status:Confirmed
171745_x_at	1.74001	0.043863	F56C11.2	ptr-11 /// WBGene00004225	PaTched Related family /// locus:ptr-11
172889_x_at	1.73891	0.10017	F58A6.8	msp-45 /// WBGene00003438	Major Sperm Protein /// locus:msp-45
181659_at	1.73606	0.21437	F35D2.2	F35D2.2 /// WBGene00018040	hypothetical protein /// status:Predicted
180833_s_at	1.73492	0.004112	D1009.4	nlp-14 /// WBGene00003752	Neuropeptide-Like Protein /// locus:nlp-14
179134_s_at	1.7345	0.037598	B0491.3	rmd-3 /// WBGene00007190	Regulator of Microtubule Dynamics /// locus:rmd-3
186475_at	1.73356	0.025822	Y106G6G.4	WBGene00013713 /// Y106G6G.4	status:Confirmed /// hypothetical protein
186539_s_at	1.73207	0.067619	Y59E9AL.2 /// Y59E9AL.3	WBGene00021993 /// WBGene00043743 /// Y59E9AL.2 /// Y59E9AL.3	status:Partially_confirmed /// status:Partially_confirmed /// hypothetical protein /// hypothetical protein
172786_x_at	1.72938	0.01007	F57H12.5	phosphatase /// WBGene00019020	hypothetical protein /// phosphatase
191763_s_at	1.72591	0.030643	F25H5.7 /// F55F8.7	F25H5.7 /// F55F8.7 /// WBGene00009129 /// WBGene00018895	hypothetical protein /// hypothetical protein /// Protein-tyrosine phosphatase /// protein-tyrosine phosphatase
181011_at	1.7258	0.05751	C35E7.9	C35E7.9 /// WBGene00016461	hypothetical protein /// status:Confirmed
178186_at	1.72471	0.12448	F25H5.8	F25H5.8 /// WBGene00009130	hypothetical protein /// status:Confirmed
191522_s_at	1.72388	0.14632	C32E12.3	osr-1 /// WBGene00016329	Osmotic Stress Resistant /// locus:osr-1
192357_at	1.72307	0.06255	W06D12.3	fat-5 /// WBGene00001397	FATty acid desaturase /// locus:fat-5
171896_x_at	1.71817	0.21354	F44D12.3 /// F44D12.5 /// F44D12.7	F44D12.3 /// F44D12.5 /// F44D12.7 /// WBGene00009680 /// WBGene00009682 /// WBGene00009684	hypothetical protein /// hypothetical protein /// hypothetical protein /// status:Confirmed /// status:Confirmed /// status:Predicted
172369_x_at	1.71705	0.011512	Y51B9A.3	WBGene00013085 /// Y51B9A.3	status:Partially_confirmed /// hypothetical protein
172268_x_at	1.71648	0.009312	D1025.4 /// D1025.6 /// D1025.9	nspc-20 /// WBGene00008356 /// WBGene00008357 /// WBGene00008360	Nematode Specific Peptide family, group C /// locus:nspc-20 /// locus:nspc-16 /// locus:nspc-19
190704_s_at	1.71569	0.009304	ZC581.7	WBGene00022634 /// ZC581.7	protein-tyrosine kinase /// hypothetical protein
190094_s_at	1.71431	0.010915	M02D8.4	M02D8.4	hypothetical protein
172380_x_at	1.71423	0.028859	F47B3.2 /// F47B3.7	F47B3.2 /// F47B3.7 /// WBGene00018526 /// WBGene00018531	hypothetical protein /// hypothetical protein /// status:Partially_confirmed /// status:Partially_confirmed
183455_at	1.71282	0.15997	F26B1.1	F26B1.1 /// WBGene00017815	hypothetical protein /// status:Partially_confirmed
186185_s_at	1.70974	0.062581	W09D6.4 /// Y47D3A.13	W09D6.4 /// WBGene00012357 /// WBGene00012926 /// Y47D3A.13	hypothetical protein /// status:Partially_confirmed /// status:Confirmed /// hypothetical protein
183850_at	1.70946	0.003897	Y48E1B.8	WBGene00013007 /// Y48E1B.8	status:Confirmed /// hypothetical protein
174252_at	1.70504	0.10928	ZK783.1	fbn-1 /// WBGene00022816	FiBrilliN homolog /// locus:fbn-1
174106_s_at	1.70495	0.060498	Y37E11B.10	Y37E11B.10	hypothetical protein
172477_x_at	1.7015	0.058548	K01D12.15 /// K01D12.7	K01D12.7 /// WBGene00010466 /// WBGene00010474	hypothetical protein /// status:Confirmed /// status:Confirmed
183702_at	1.70092	0.004529	K05B2.4	K05B2.4 /// WBGene00019404	hypothetical protein /// status:Partially_confirmed
175284_at	1.7	0.015546	F07A5.4	F07A5.4 /// WBGene00008543	hypothetical protein /// status:Partially_confirmed
193047_at	1.69992	0.054825	F40F9.3	F40F9.3 /// WBGene00009581	hypothetical protein /// PDZ domain (Also known as DHR or GLGF).
172935_x_at	1.69842	0.042248	T03F1.5	gsp-4 /// WBGene00020187	yeast Glc Seven-like Phosphatases /// locus:gsp-4
172333_x_at	1.69828	0.10162	F44D12.5	F44D12.5 /// WBGene00009682	hypothetical protein /// status:Confirmed
186105_s_at	1.69782	0.056073	C10G11.9 /// T27A3.4	C10G11.9 /// T27A3.4 /// WBGene00015689 /// WBGene00020840	hypothetical protein /// hypothetical protein /// status:Partially_confirmed /// status:Confirmed
190359_at	1.69396	0.017547	C01G6.7	C01G6.7 /// WBGene00007228	hypothetical protein /// locus:acs-7
177270_at	1.69212	0.13161	JC8.12	JC8.12	hypothetical protein
172105_x_at	1.69079	0.073961	---	---	---
179824_at	1.69071	0.17217	Y47D3B.4	WBGene00012941 /// Y47D3B.4	status:Confirmed /// hypothetical protein
186107_s_at	1.68822	0.029011	F36H12.9 /// R13H9.6	F36H12.9 /// R13H9.6 /// WBGene00018123 /// WBGene00020072	hypothetical protein /// hypothetical protein /// status:Partially_confirmed /// status:Partially_confirmed
189542_at	1.68503	0.025643	AC8.2 /// Y71F9AL.2	WBGene00022108 /// Y71F9AL.2	protein kinase /// hypothetical protein
176606_at	1.68249	0.062468	F48C1.7	spe-11 /// WBGene00004965	defective SPErmatogenesis /// locus:spe-11
172896_x_at	1.68069	0.072313	C34F11.6	msp-49 /// WBGene00003442	Major Sperm Protein /// locus:msp-49
180945_s_at	1.67629	0.006226	F49C12.7	F49C12.7	hypothetical protein
171880_x_at	1.67619	0.12303	C24D10.7 /// C24D10.8 /// F11G11.8 /// ZK337.6	nspd-3 /// nspd-6 /// WBGene00016058 /// WBGene00043147	Nematode Specific Peptide family, group D /// Nematode Specific Peptide family, group D /// locus:nspd-3 /// locus:nspd-6
181933_at	1.67534	0.025329	T27A3.5	T27A3.5 /// WBGene00020841	hypothetical protein /// status:Partially_confirmed
191643_at	1.67501	0.005568	F42G8.8	F42G8.8 /// WBGene00018359	hypothetical protein /// ser/thr-protein phosphatase
192663_at	1.67456	0.17148	ZK938.1	WBGene00014158 /// ZK938.1	serine/threonine protein phosphatase /// hypothetical protein
190699_at	1.67276	0.058358	C36H8.1	C36H8.1 /// WBGene00007987	hypothetical protein /// major sperm protein like
172991_at	1.6707	0.080726	C45B2.7	ptr-4 /// WBGene00004219	PaTched Related family /// locus:ptr-4
172933_x_at	1.66918	0.056527	W09C3.6	gsp-3 /// WBGene00021113	yeast Glc Seven-like Phosphatases /// locus:gsp-3
190848_at	1.66632	0.032654	B0280.17	B0280.17 /// WBGene00044674	hypothetical protein /// status:Confirmed
179190_at	1.66627	0.023147	ZK892.5	WBGene00014129 /// ZK892.5	status:Confirmed /// hypothetical protein
190702_at	1.6651	0.077486	K01H12.2	ant-1.3 /// WBGene00010485	Adenine Nucleotide Translocator /// locus:ant-1.3
184708_s_at	1.66495	0.020168	C43E11.5 /// C50F2.5	C43E11.5 /// C50F2.5 /// WBGene00016605 /// WBGene00016839	hypothetical protein /// hypothetical protein /// status:Partially_confirmed /// status:Partially_confirmed
191913_s_at	1.66459	0.026148	C17H12.3	C17H12.3 /// WBGene00015929	hypothetical protein /// protein-tyrosine phosphatase
179892_at	1.66413	0.035672	K06A5.2	K06A5.2 /// WBGene00019430	hypothetical protein /// status:Confirmed
178945_s_at	1.6621	0.06142	F53B6.4	F53B6.4 /// WBGene00009959	hypothetical protein /// status:Partially_confirmed
181086_at	1.66186	0.011051	C15A11.2	C15A11.2 /// WBGene00007597	hypothetical protein /// status:Confirmed
186021_s_at	1.66115	0.046707	W03D8.10 /// W03D8.9	W03D8.10 /// W03D8.9 /// WBGene00020990 /// WBGene00020991	hypothetical protein /// hypothetical protein /// status:Confirmed /// status:Predicted
181778_at	1.65828	0.018506	T14G10.8	T14G10.8 /// WBGene00011777	hypothetical protein /// status:Confirmed
177924_s_at	1.65817	0.022093	F21D9.2	F21D9.2 /// WBGene00009016	hypothetical protein /// status:Partially_confirmed
180376_s_at	1.65783	0.10661	M03A1.7	dao-2 /// WBGene00000928	Dauer or Aging adult Overexpression /// locus:dao-2
183341_at	1.65673	0.059597	T23G11.1	T23G11.1 /// WBGene00011968	hypothetical protein /// status:Confirmed
172555_x_at	1.65609	0.037946	K01D12.15 /// K01D12.7	K01D12.15 /// WBGene00010466 /// WBGene00010474	hypothetical protein /// status:Confirmed /// status:Confirmed
175419_at	1.654	0.040561	T26C11.7	ceh-39 /// WBGene00000460	Homeobox /// locus:ceh-39
192926_at	1.65147	0.014893	C30B5.3	cpb-2 /// WBGene00000771	CPEB polyA binding family /// locus:cpb-2
192023_s_at	1.64655	0.02935	C33F10.8	C33F10.8 /// WBGene00016356	hypothetical protein /// protein tyrosine phosphatase
189193_at	1.64428	0.021809	F59A6.4	F59A6.4 /// WBGene00019086	hypothetical protein /// Protein kinase
179012_at	1.64238	0.018797	K08E4.7	K08E4.7 /// WBGene00045036	hypothetical protein /// status:Partially_confirmed
172815_x_at	1.64056	0.076209	K05F1.2	msp-142 /// WBGene00003469	Major Sperm Protein /// locus:msp-142
174264_at	1.63837	0.18343	---	---	---
186811_s_at	1.63756	0.004568	ZK550.6	WBGene00014000 /// ZK550.6	status:Confirmed /// hypothetical protein
194245_x_at	1.63356	0.013074	C03G5.10 /// C03G5.13 /// C03G5.9 /// F42F12.1 /// F42F12.10 /// F42F12.13 /// F42F12.6 /// F42F12.7 /// F42F12.8	nspc-12 /// nspc-13 /// nspc-14 /// nspc-15 /// nspc-2 /// nspc-3 /// nspc-6 /// nspc-9 /// WBGene00009634 /// WBGene00009637 /// WBGene00009638 /// WBGene00009639 /// WBGene00023493 /// WBGene00044337 /// WBGene00044338 /// WBGene00044357	Nematode Specific Peptide family, group C /// Nematode Specific Peptide family, group C /// Nematode Specific Peptide family, group C /// Nematode Specific Peptide family, group C /// Nematode Specific Peptide family, group C /// Nematode Specific Peptide family, group C /// Nematode Specific Peptide family, group C /// Nematode Specific Peptide family, group C /// locus:nspc-9 /// locus:nspc-13 …
182409_s_at	1.63219	0.010603	F11C7.3	vap-1	Venom-Allergen-like Protein
187377_at	1.62846	0.017783	F37A4.5	F37A4.5 /// WBGene00018135	hypothetical protein /// status:Partially_confirmed
185086_at	1.62354	0.097943	F47C12.4	clec-79 /// WBGene00018548	C-type LECtin /// locus:clec-79
190525_s_at	1.62296	0.045793	K03H1.1	gln-2 /// WBGene00001603	GLutamiNe synthetase (glutamate-ammonia ligase) /// locus:gln-2
179325_at	1.62227	0.003036	T10G3.1	T10G3.1 /// WBGene00011692	hypothetical protein /// status:Confirmed
172324_x_at	1.62207	0.001693	C03G5.10 /// C03G5.11 /// C03G5.12 /// C03G5.13 /// C03G5.8 /// C03G5.9 /// F42F12.1 /// F42F12.10 /// F42F12.13 /// F42F12.6 /// F42F12.7 /// F42F12.8 /// F42F12.9	nspc-1 /// nspc-10 /// nspc-12 /// nspc-13 /// nspc-14 /// nspc-15 /// nspc-2 /// nspc-3 /// nspc-4 /// nspc-5 /// nspc-6 /// nspc-9 /// WBGene00009634 /// WBGene00009637 /// WBGene00009638 /// WBGene00009639 /// WBGene00009640 /// WBGene00023477 /// WBGene00023493 /// WBGene00044337 /// WBGene00044338 /// WBGene00044339 /// WBGene00044340 /// WBGene00044357	Nematode Specific Peptide family, group C /// Nematode Specific Peptide family, group C /// Nematode Specific Peptide family, group C /// Nematode Specific Peptide family, group C /// Nematode Specific Peptide family, group C /// Nematode Specific Peptide family, group C /// Nematode Specific Peptide family, group C /// Nematode Specific Peptide family, group C /// Nematode Specific Peptide famil…
177612_s_at	1.62155	0.06856	F17B5.1	F17B5.1	hypothetical protein
172113_x_at	1.62115	0.08402	Y59H11AM.1	WBGene00022005 /// Y59H11AM.1	status:Predicted /// hypothetical protein
193013_at	1.61887	0.054128	T02E1.7	T02E1.7 /// WBGene00011379	hypothetical protein /// Yeast hypothetical protein YG5Y like
172814_x_at	1.61872	0.08367	C35E7.10	C35E7.10	hypothetical protein
185576_at	1.61677	0.094249	K02E10.4	K02E10.4	hypothetical protein
183744_at	1.61664	0.018107	F59A1.10	F59A1.10 /// WBGene00010296	hypothetical protein /// status:Partially_confirmed
184065_at	1.61521	0.061506	Y38F1A.7	WBGene00012609 /// Y38F1A.7	status:Partially_confirmed /// hypothetical protein
175570_at	1.61179	0.045592	---	---	---
184095_at	1.61146	0.058973	F17E9.5	F17E9.5 /// WBGene00017542	hypothetical protein /// status:Partially_confirmed
182085_at	1.60907	0.14071	C23H3.9	C23H3.9	hypothetical protein
191985_at	1.60774	0.010235	F40G12.10	F40G12.10 /// WBGene00009605	hypothetical protein /// protein-tyrosine phosphatase
192614_at	1.60586	0.10856	C09G9.4	tag-19 /// WBGene00006409	Temporarily Assigned Gene name /// locus:tag-19
172904_x_at	1.60439	0.097513	K05F1.7	msp-63 /// WBGene00003456	Major Sperm Protein /// locus:msp-63
183148_at	1.60419	0.08804	F20D6.1	F20D6.1 /// WBGene00017633	hypothetical protein /// status:Partially_confirmed
184751_at	1.60154	0.013572	Y53F4B.19	WBGene00013165 /// Y53F4B.19	status:Partially_confirmed /// hypothetical protein
192165_s_at	1.60144	0.079994	K11C4.1	K11C4.1 /// WBGene00019642	hypothetical protein /// serine/threonine-protein kinase
179482_at	1.60122	0.059018	F07A5.2	F07A5.2 /// WBGene00008541	hypothetical protein /// status:Confirmed
178893_at	1.60104	0.04817	C08F8.4	C08F8.4 /// WBGene00007446	hypothetical protein /// locus:mboa-4
190379_at	1.60061	0.10193	T12E12.6	T12E12.6 /// WBGene00020465	hypothetical protein /// zinc metalloprotease
185933_at	1.59839	0.095036	F49E10.2	F49E10.2	hypothetical protein
190764_at	1.59395	0.015397	T05C12.1	T05C12.1 /// WBGene00011466	hypothetical protein /// serine/threonine kinase
180308_at	1.59325	0.035238	C18E3.1	C18E3.1 /// WBGene00015970	hypothetical protein /// status:Partially_confirmed
181480_at	1.59232	0.097076	C15F1.2	C15F1.2 /// WBGene00015795	hypothetical protein /// status:Partially_confirmed
189259_s_at	1.59053	0.016955	T02D1.5	pmp-4 /// WBGene00004061	Peroxisomal Membrane Protein related /// locus:pmp-4
181902_at	1.58997	0.14716	Y43D4A.5	WBGene00012791 /// Y43D4A.5	status:Predicted /// hypothetical protein
181959_at	1.58985	0.032744	ZK1053.2	WBGene00014197 /// ZK1053.2	status:Partially_confirmed /// hypothetical protein
191746_at	1.58975	0.035375	ZK484.7	WBGene00022753 /// ZK484.7	protein tyrosine phosphatase /// hypothetical protein
187045_at	1.58876	0.031935	Y57G11C.14	WBGene00013310 /// Y57G11C.14	status:Partially_confirmed /// hypothetical protein
190565_at	1.58532	0.074362	C27D8.1	C27D8.1 /// WBGene00007777	hypothetical protein /// serine/threonine kinase
173911_s_at	1.58338	0.00195	F58F9.7	F58F9.7 /// WBGene00019060	hypothetical protein /// acyl-coenzyme A oxidase
179360_s_at	1.58297	0.010139	T16G1.7	T16G1.7 /// WBGene00011801	hypothetical protein /// status:Partially_confirmed
184740_at	1.58022	0.1273	C33F10.1	C33F10.1 /// WBGene00016351	hypothetical protein /// status:Confirmed
193849_at	1.5799	0.013636	F13D11.4	F13D11.4 /// WBGene00017429	hypothetical protein /// dihydroflavonol-4-reductase (maize, petunia, tomato)
184787_at	1.57907	0.1124	F46G11.2	F46G11.2 /// WBGene00018515	hypothetical protein /// status:Confirmed
185869_at	1.57762	0.05654	F35H10.3	F35H10.3 /// WBGene00018069	hypothetical protein /// status:Partially_confirmed
175730_at	1.57215	0.17987	C01C10.1	clc-2 /// WBGene00000523	CLaudin-like in Caenorhabditis /// locus:clc-2
192031_at	1.57167	0.10394	C53D6.10	C53D6.10 /// WBGene00023424	hypothetical protein /// status:Partially_confirmed
176972_at	1.57001	0.036332	Y105E8A.27	WBGene00013684 /// Y105E8A.27	status:Confirmed /// hypothetical protein
178142_at	1.56799	0.058184	F58D2.2	F58D2.2 /// WBGene00010241	hypothetical protein /// status:Partially_confirmed
173151_s_at	1.5674	0.033678	C17C3.1	C17C3.1	hypothetical protein
190937_s_at	1.56664	0.042449	C49A1.3	C49A1.3 /// WBGene00008186	hypothetical protein /// Putative membrane protein
188964_at	1.56606	0.025082	D1081.5	D1081.5 /// WBGene00008383	hypothetical protein /// ankyrin motif
189112_at	1.56285	0.020232	F59A3.8	F59A3.8 /// WBGene00019081	hypothetical protein /// protein kinase
180786_at	1.56116	0.011147	K09C6.9	K09C6.9 /// WBGene00019563	hypothetical protein /// status:Confirmed
190348_at	1.56059	0.26747	C09G5.6	bli-1 /// WBGene00000251	BLIstered cuticle /// locus:bli-1
172026_x_at	1.56019	0.000666	F11C7.3	vap-1	Venom-Allergen-like Protein
188563_s_at	1.55982	0.014782	C23G10.1	C23G10.1	hypothetical protein
193212_s_at	1.55706	0.050176	C33F10.12 /// T05F1.8	C33F10.12 /// T05F1.8 /// WBGene00011493 /// WBGene00016358	hypothetical protein /// hypothetical protein /// mitochondrial phosphate carrier protein /// mitochondrial phosphate carrier protei
192943_at	1.55658	0.069119	ZK1251.3	WBGene00014241 /// ZK1251.3	3-oxo-5-alpha-steroid 4-dehydrogenase /// hypothetical protein
193156_s_at	1.55648	0.0345	K10D3.4	K10D3.4 /// WBGene00010738	hypothetical protein /// serine proteinase inhibitor (kunitz type)
175335_at	1.55648	0.01615	F46F11.6	F46F11.6 /// WBGene00018509	hypothetical protein /// status:Confirmed
191224_s_at	1.55528	0.005509	ZK507.1	WBGene00013978 /// ZK507.1	serine/threonine kinase /// hypothetical protein
189984_s_at	1.55519	0.000815	T07C12.9	N-methyltransferase /// WBGene00011573	hypothetical protein /// N-methyltransferase
177447_s_at	1.55348	0.040888	F32H2.7	F32H2.7 /// WBGene00009344	hypothetical protein /// status:Confirmed
179638_at	1.55197	0.073691	ZC412.5	WBGene00013886 /// ZC412.5	status:Partially_confirmed /// hypothetical protein
187286_at	1.55132	0.054682	F07F6.1	F07F6.1 /// WBGene00017215	hypothetical protein /// status:Partially_confirmed
194070_at	1.55064	0.035481	F22D6.1	kin-14 /// WBGene00002198	protein KINase /// locus:kin-14
188345_s_at	1.55048	0.17178	F12F6.9	col-128 /// WBGene00000702	COLlagen /// locus:col-128
183734_at	1.55042	0.074276	F27C1.1	F27C1.1 /// WBGene00017851	hypothetical protein /// status:Confirmed
182378_s_at	1.5499	0.16197	Y43F8C.5	WBGene00012827 /// Y43F8C.5	status:Confirmed /// hypothetical protein
190795_s_at	1.54943	0.05007	F35C11.3 /// M05D6.1	F35C11.3 /// M05D6.1 /// WBGene00009402 /// WBGene00010874	hypothetical protein /// hypothetical protein /// serine/threonine kinase /// serine/threonine kinase
193268_at	1.54916	0.041211	Y1A5A.1	WBGene00012379 /// Y1A5A.1	LIM domain containing proteins (2 domains) /// hypothetical protein
177131_s_at	1.54787	0.010018	F15E11.13 /// Y19D10B.7	F15E11.13 /// WBGene00017499 /// WBGene00021236 /// Y19D10B.7	hypothetical protein /// status:Partially_confirmed /// status:Partially_confirmed /// hypothetical protein
172734_x_at	1.54603	0.053918	ZK1248.4	WBGene00022875 /// ZK1248.4	Major sperm protein /// hypothetical protein
181115_at	1.54502	0.012728	Y69E1A.8	WBGene00013478 /// Y69E1A.8	status:Confirmed /// hypothetical protein
189362_at	1.54457	0.071115	F56H11.3	elo-7 /// WBGene00001245	fatty acid ELOngation /// locus:elo-7
180562_at	1.54056	0.003671	B0218.8	clec-52 /// WBGene00015052	C-type LECtin /// locus:clec-52
191005_at	1.54001	0.051018	W02B12.12	W02B12.12	hypothetical protein
187612_s_at	1.53948	0.10728	F47D12.7	F47D12.7 /// WBGene00018563	hypothetical protein /// status:Partially_confirmed
178935_at	1.53752	0.13908	F07D3.3	F07D3.3 /// WBGene00008556	hypothetical protein /// status:Partially_confirmed
188037_at	1.53637	0.201	ZK377.1	WBGene00006952 /// wrt-6	locus:wrt-6 /// WaRThog (hedgehog-like family)
187771_at	1.53489	0.34947	F43E2.11 /// F43E2.6	F43E2.11 /// F43E2.6 /// WBGene00018397	hypothetical protein /// hypothetical protein /// status:Predicted
176305_at	1.53252	0.078875	Y22D7AR.11	fbxa-13 /// WBGene00021264	F-box A protein /// locus:fbxa-13
179646_at	1.53005	0.078012	C18E9.8	C18E9.8 /// WBGene00007688	hypothetical protein /// status:Partially_confirmed
173335_s_at	1.52795	0.004797	C24B9.9	dod-3 /// WBGene00016052	Downstream Of DAF-16 (regulated by DAF-16) /// locus:dod-3
185073_at	1.52667	0.040846	K07C11.3	K07C11.3 /// WBGene00019476	hypothetical protein /// status:Confirmed
185420_at	1.52622	0.072754	C24D10.2	C24D10.2 /// WBGene00016054	hypothetical protein /// status:Confirmed
179316_at	1.52418	0.021913	F58H1.6	F58H1.6 /// WBGene00010289	hypothetical protein /// status:Confirmed
175854_s_at	1.52307	0.20402	M70.3	M70.3	hypothetical protein
192175_at	1.52307	0.036865	C27D6.3	C27D6.3 /// WBGene00016161	hypothetical protein /// MST101-2 protein (Fruit Fly)
180252_at	1.52262	0.006593	F07E5.8	F07E5.8 /// WBGene00017213	hypothetical protein /// status:Predicted
184345_at	1.52214	0.059057	Y73F8A.15	WBGene00013524 /// Y73F8A.15	status:Partially_confirmed /// hypothetical protein
191805_s_at	1.52201	0.10425	F23H12.5	F23H12.5 /// WBGene00009094	hypothetical protein /// Thrombospondin type 1 domain
177053_at	1.52022	0.04758	Y42H9AR.2	WBGene00021537 /// Y42H9AR.2	status:Partially_confirmed /// hypothetical protein
188390_at	1.52005	0.040954	F56C11.2	ptr-11 /// WBGene00004225	PaTched Related family /// locus:ptr-11
190541_at	1.51873	0.06485	C30G12.2	C30G12.2 /// WBGene00016274	hypothetical protein /// Alcohol dehydrogenase
181719_at	1.51811	0.078187	T05C12.4	T05C12.4 /// WBGene00011468	hypothetical protein /// status:Partially_confirmed
182193_at	1.51671	0.12313	ZK484.5	WBGene00022751 /// ZK484.5	status:Confirmed /// hypothetical protein
178740_at	1.51513	0.081192	T22C1.9	T22C1.9 /// WBGene00011919	hypothetical protein /// status:Confirmed
177687_at	1.51393	0.057237	K09G1.2	K09G1.2 /// WBGene00010728	hypothetical protein /// status:Confirmed
175272_at	1.51322	0.077426	F45D3.2	F45D3.2 /// WBGene00009722	hypothetical protein /// status:Partially_confirmed
181736_s_at	1.5115	0.044135	K05F1.9	K05F1.9 /// WBGene00019410	hypothetical protein /// status:Confirmed
172715_x_at	1.51135	0.008632	C03G5.10 /// C03G5.11 /// C03G5.12 /// C03G5.13 /// C03G5.9 /// F42F12.1 /// F42F12.10 /// F42F12.13 /// F42F12.6 /// F42F12.7 /// F42F12.8 /// F42F12.9	nspc-10 /// nspc-12 /// nspc-13 /// nspc-14 /// nspc-15 /// nspc-2 /// nspc-3 /// nspc-4 /// nspc-5 /// nspc-6 /// nspc-9 /// WBGene00009634 /// WBGene00009637 /// WBGene00009638 /// WBGene00009639 /// WBGene00009640 /// WBGene00023493 /// WBGene00044337 /// WBGene00044338 /// WBGene00044339 /// WBGene00044340 /// WBGene00044357	Nematode Specific Peptide family, group C /// Nematode Specific Peptide family, group C /// Nematode Specific Peptide family, group C /// Nematode Specific Peptide family, group C /// Nematode Specific Peptide family, group C /// Nematode Specific Peptide family, group C /// Nematode Specific Peptide family, group C /// Nematode Specific Peptide family, group C /// Nematode Specific Peptide famil…
177668_s_at	1.50906	0.030383	B0393.4	B0393.4 /// WBGene00007169	hypothetical protein /// status:Partially_confirmed
189162_s_at	1.50843	0.015301	F23C8.8	F23C8.8 /// WBGene00017737	hypothetical protein /// protein kinase
188592_at	1.50651	0.029134	E03A3.4	his-70 /// WBGene00001944	HIStone /// locus:his-70
194066_s_at	1.50641	0.1676	ZK666.7	clec-61 /// WBGene00014047	C-type LECtin /// locus:clec-61
182120_at	1.50641	0.024795	Y87G2A.2	WBGene00013594 /// Y87G2A.2	status:Partially_confirmed /// hypothetical protein
172695_x_at	1.50402	0.012152	ZC477.1	ssq-3 /// WBGene00006052	Sperm-Specific family, class Q /// locus:ssq-3
183590_at	1.50296	0.021647	C50E3.6	C50E3.6 /// WBGene00016817	hypothetical protein /// status:Confirmed
185480_s_at	1.50216	0.026601	F36H12.8 /// R13H9.5	F36H12.8 /// R13H9.5 /// WBGene00018122 /// WBGene00020071	hypothetical protein /// hypothetical protein /// locus:ttbk-2 /// status:Partially_confirmed
189131_at	1.50203	0.010194	R05D3.3	R05D3.3 /// WBGene00019878	hypothetical protein /// Zinc finger
181168_at	1.49993	0.013691	C34D4.2	C34D4.2 /// WBGene00016398	hypothetical protein /// status:Partially_confirmed
189983_at	1.49963	0.093024	B0365.5	clec-225	C-type LECtin
188227_at	1.49919	0.056757	T28H11.5	ssq-2 /// WBGene00006051	Sperm-Specific family, class Q /// locus:ssq-2
193584_s_at	1.49891	0.002135	ZK520.5	cyn-2 /// WBGene00000878	CYclophyliN /// locus:cyn-2
193734_at	1.49874	0.045087	C15H7.3	C15H7.3 /// WBGene00007610	hypothetical protein /// Protein tyrosine phosphatase (non-receptor class)
189889_at	1.49832	0.080107	K06A1.2	K06A1.2 /// WBGene00019425	hypothetical protein /// status:Partially_confirmed
184886_at	1.49823	0.06259	Y39E4B.11	WBGene00012720 /// Y39E4B.11	status:Confirmed /// hypothetical protein
183921_at	1.49806	0.037011	F26F4.2	F26F4.2 /// WBGene00005012	hypothetical protein /// status:Confirmed
187579_at	1.49646	0.010338	F37A4.4	F37A4.4 /// WBGene00018134	hypothetical protein /// status:Partially_confirmed
182433_s_at	1.49585	0.17461	C25D7.12 /// C25D7.14 /// C25D7.2	C25D7.12 /// WBGene00007721	hypothetical protein /// status:Predicted
185439_at	1.49448	0.017036	H20J04.1	H20J04.1 /// WBGene00019216	hypothetical protein /// status:Partially_confirmed
187385_s_at	1.4937	0.045165	ZK757.3	tag-76	Temporarily Assigned Gene name
188396_at	1.49361	0.009502	F20D1.8	cutl-3 /// WBGene00008978	CUTiclin-Like /// locus:cutl-3
172074_x_at	1.49339	0.13982	Y69A2AR.8	WBGene00022079 /// Y69A2AR.8	status:Confirmed /// hypothetical protein
172716_x_at	1.49243	0.002603	C03G5.10 /// C03G5.13 /// C03G5.9 /// F42F12.1 /// F42F12.10 /// F42F12.13 /// F42F12.6 /// F42F12.7 /// F42F12.8 /// F42F12.9	nspc-10 /// nspc-12 /// nspc-13 /// nspc-14 /// nspc-15 /// nspc-2 /// nspc-3 /// nspc-6 /// nspc-9 /// WBGene00009634 /// WBGene00009637 /// WBGene00009638 /// WBGene00009639 /// WBGene00009640 /// WBGene00023493 /// WBGene00044337 /// WBGene00044338 /// WBGene00044357	Nematode Specific Peptide family, group C /// Nematode Specific Peptide family, group C /// Nematode Specific Peptide family, group C /// Nematode Specific Peptide family, group C /// Nematode Specific Peptide family, group C /// Nematode Specific Peptide family, group C /// Nematode Specific Peptide family, group C /// Nematode Specific Peptide family, group C /// Nematode Specific Peptide famil…
191766_s_at	1.49237	0.013121	F47B3.1 /// F47B3.6	F47B3.1 /// F47B3.6 /// WBGene00018525 /// WBGene00018530	hypothetical protein /// hypothetical protein /// protein-tyrosine phosphatase /// status:Predicted
177525_s_at	1.49236	0.019914	R155.2	R155.2 /// WBGene00020116	hypothetical protein /// status:Partially_confirmed
181597_at	1.49215	0.031944	C04E6.4	C04E6.4 /// WBGene00015421	hypothetical protein /// status:Partially_confirmed
178033_at	1.49116	0.09183	F56H6.6	F56H6.6 /// WBGene00010167	hypothetical protein /// status:Partially_confirmed
177644_s_at	1.49097	0.11178	F58E6.5	F58E6.5 /// WBGene00010254	hypothetical protein /// status:Confirmed
172467_x_at	1.4902	0.025861	C34G6.3	C34G6.3 /// WBGene00016420	hypothetical protein /// status:Confirmed
180724_at	1.48935	0.33198	C03C11.1	C03C11.1 /// WBGene00007274	hypothetical protein /// status:Confirmed
179632_s_at	1.48932	0.006084	F45D3.3	F45D3.3 /// WBGene00009723	hypothetical protein /// status:Confirmed
186757_s_at	1.48928	0.00851	F42A8.1	F42A8.1 /// WBGene00009626	hypothetical protein /// status:Confirmed
182518_s_at	1.48859	0.080082	C14C11.1 /// C18G1.9 /// ZC317.6	C14C11.1 /// C18G1.9 /// WBGene00015765 /// WBGene00015987 /// WBGene00022589 /// ZC317.6	hypothetical protein /// hypothetical protein /// status:Confirmed /// status:Partially_confirmed /// status:Confirmed /// hypothetical protein
180715_at	1.48858	0.037922	Y48B6A.5	WBGene00012979 /// Y48B6A.5	status:Partially_confirmed /// hypothetical protein
172156_x_at	1.48739	0.021644	Y54G2A.36 /// Y71A12B.19	WBGene00021898 /// Y54G2A.36	status:Confirmed /// hypothetical protein
175964_at	1.48725	0.028317	F54A3.4	F54A3.4 /// WBGene00018783	hypothetical protein /// status:Partially_confirmed
182470_at	1.48367	0.062631	F09F7.6	F09F7.6 /// WBGene00017303	hypothetical protein /// status:Partially_confirmed
174360_at	1.48254	0.005777	K06A1.3	cutl-16 /// WBGene00019426	CUTiclin-Like /// locus:cutl-16
191994_at	1.48216	0.038572	Y113G7C.1	WBGene00013771 /// Y113G7C.1	Protein-tyrosine phosphatase /// hypothetical protein
182520_s_at	1.48172	0.061266	R09E10.6	R09E10.6 /// WBGene00011176	hypothetical protein /// status:Confirmed
176370_at	1.48171	0.10432	Y22D7AL.11	WBGene00021249 /// Y22D7AL.11	status:Partially_confirmed /// hypothetical protein
182330_s_at	1.48014	0.01968	Y37A1A.2	WBGene00012535 /// Y37A1A.2	status:Partially_confirmed /// hypothetical protein
180754_at	1.47959	0.058181	C31H1.5	C31H1.5 /// WBGene00016288	hypothetical protein /// status:Partially_confirmed
181961_at	1.47921	0.017362	T22H9.4	T22H9.4 /// WBGene00020708	hypothetical protein /// status:Confirmed
188217_at	1.47798	0.023757	Y80D3A.7	ptr-22 /// WBGene00004236	PaTched Related family /// locus:ptr-22
186759_at	1.47788	0.020098	F13G3.3	F13G3.3	hypothetical protein
175227_s_at	1.47672	0.009584	Y116A8C.24 /// Y116A8C.38	WBGene00013801 /// WBGene00013811 /// Y116A8C.24 /// Y116A8C.38	status:Partially_confirmed /// status:Partially_confirmed /// hypothetical protein /// hypothetical protein
190423_at	1.4765	0.062914	C08F8.6	C08F8.6 /// WBGene00007448	hypothetical protein /// serine/threonine kinase
172327_x_at	1.4745	0.096419	F44D12.3 /// F44D12.7	F44D12.3 /// F44D12.7 /// WBGene00009680 /// WBGene00009684	hypothetical protein /// hypothetical protein /// status:Confirmed /// status:Predicted
185556_at	1.47318	0.17336	C32E12.1	C32E12.1 /// WBGene00016327	hypothetical protein /// status:Partially_confirmed
180730_at	1.47243	0.032126	F31E8.5	F31E8.5 /// WBGene00017955	hypothetical protein /// status:Partially_confirmed
180055_at	1.46923	0.11338	ZC328.1	WBGene00022591 /// ZC328.1	locus:cuti-1 /// hypothetical protein
171912_x_at	1.46903	0.1022	C04F6.3	cht-1 /// WBGene00000503	CHiTinase /// locus:cht-1
192712_at	1.46724	0.11774	F32E10.3	clec-180 /// WBGene00017991	C-type LECtin /// locus:clec-180
181745_at	1.46605	0.070135	ZK783.1	fbn-1 /// WBGene00022816	FiBrilliN homolog /// locus:fbn-1
181497_at	1.46581	0.062766	C09B9.2	C09B9.2 /// WBGene00015627	hypothetical protein /// status:Partially_confirmed
181473_s_at	1.4654	0.074614	C15C6.2	C15C6.2	hypothetical protein
186801_s_at	1.46294	0.017446	F45D11.14 /// F45D11.15 /// F45D11.16	F45D11.14 /// F45D11.15 /// F45D11.16 /// WBGene00018459 /// WBGene00018460 /// WBGene00018461	hypothetical protein /// hypothetical protein /// hypothetical protein /// status:Predicted /// status:Predicted /// status:Predicted
193242_at	1.46244	0.019191	F28C1.3	F28C1.3	hypothetical protein
178541_at	1.4622	0.014024	ZK84.2	WBGene00022650 /// ZK84.2	status:Confirmed /// hypothetical protein
177448_at	1.46077	0.024261	R155.3	R155.3 /// WBGene00020117	hypothetical protein /// status:Partially_confirmed
173355_s_at	1.46068	0.2037	T14B4.6	dpy-2 /// WBGene00001064	DumPY : shorter than wild-type /// locus:dpy-2
184864_at	1.46014	0.35562	C08F11.11	C08F11.11 /// WBGene00007458	hypothetical protein /// status:Confirmed
192034_s_at	1.45863	0.000617	D1009.1	D1009.1	hypothetical protein
172254_x_at	1.45799	0.10033	Y43C5A.1	nspd-7 /// WBGene00012781	Nematode Specific Peptide family, group D /// locus:nspd-7
183138_at	1.4561	0.081291	C06A6.5	C06A6.5 /// WBGene00015510	hypothetical protein /// status:Confirmed
188562_at	1.45484	0.00472	C23G10.1	C23G10.1	hypothetical protein
182001_at	1.45286	0.12714	Y51B9A.5	WBGene00013087 /// Y51B9A.5	status:Confirmed /// hypothetical protein
172312_x_at	1.45252	0.054825	K09C6.7 /// K09C6.8	K09C6.7 /// WBGene00019561 /// WBGene00019562	hypothetical protein /// status:Confirmed /// status:Partially_confirmed
178432_s_at	1.45242	0.011907	ZC443.3	WBGene00013898 /// ZC443.3	status:Partially_confirmed /// hypothetical protein
180486_at	1.45147	0.24494	F10D11.4	F10D11.4 /// WBGene00008650	hypothetical protein /// status:Partially_confirmed
185087_s_at	1.45114	0.060128	F47C12.4 /// Y46C8AL.1	clec-73 /// clec-79 /// WBGene00018548 /// WBGene00021579	C-type LECtin /// C-type LECtin /// locus:clec-79 /// locus:clec-73
192135_at	1.45072	0.008116	B0272.4	B0272.4 /// WBGene00007130	hypothetical protein /// enoyl-CoA hydratase/isomerase
181488_at	1.45023	0.021626	F36A2.14	F36A2.14 /// WBGene00023490	hypothetical protein /// status:Partially_confirmed
186800_s_at	1.44806	0.056645	C33F10.11	C33F10.11	hypothetical protein
191808_s_at	1.4477	0.062833	ZK1251.5 /// ZK354.8	WBGene00022709 /// ZK354.8	protein phosphatase /// hypothetical protein
187066_at	1.44739	0.005192	Y55B1AR.4	WBGene00021908 /// Y55B1AR.4	status:Confirmed /// hypothetical protein
181625_s_at	1.4466	0.13034	W09C3.7	W09C3.7 /// WBGene00021114	hypothetical protein /// status:Confirmed
172245_x_at	1.4462	0.095901	K07F5.5	nspd-2 /// WBGene00010633	Nematode Specific Peptide family, group D /// locus:nspd-2
186477_at	1.44542	0.032558	F36H12.14	F36H12.14 /// WBGene00018127	hypothetical protein /// status:Partially_confirmed
192387_at	1.44532	0.059367	D1081.4	D1081.4 /// WBGene00008382	hypothetical protein /// guanine nucleotide binding domains
186504_s_at	1.4448	0.066112	C14C11.1 /// ZC317.6	C14C11.1 /// WBGene00015765 /// WBGene00022589 /// ZC317.6	hypothetical protein /// status:Confirmed /// status:Confirmed /// hypothetical protein
190466_at	1.44396	0.10878	F10F2.7	clec-151 /// WBGene00008659	C-type LECtin /// locus:clec-151
181139_at	1.44318	0.020424	F13G11.2	F13G11.2 /// WBGene00008772	hypothetical protein /// status:Partially_confirmed
192084_s_at	1.44278	0.000335	C32D5.2	sma-6 /// WBGene00004860	SMAll /// locus:sma-6
180281_s_at	1.44256	0.021586	B0244.9	B0244.9 /// WBGene00015084	hypothetical protein /// status:Confirmed
177059_at	1.44203	0.000508	Y46C8AL.5	clec-72 /// WBGene00021583	C-type LECtin /// locus:clec-72
191907_s_at	1.4414	0.037445	F22E5.3 /// ZC239.7	gcy-15 /// gcy-21 /// WBGene00001541 /// WBGene00001546	Guanylyl CYclase /// Guanylyl CYclase /// locus:gcy-15 /// locus:gcy-21
177729_at	1.44116	0.22525	E01G4.6	E01G4.6 /// WBGene00008448	hypothetical protein /// status:Partially_confirmed
176459_at	1.44013	0.14246	Y102A11A.5	WBGene00022415 /// Y102A11A.5	status:Confirmed /// hypothetical protein
193750_at	1.4397	0.020737	C25G4.6	C25G4.6 /// WBGene00007733	hypothetical protein /// PDZ domain (Also known as DHR or GLGF). (2 domains)
188314_at	1.43905	0.007114	ZK75.1	ins-4 /// WBGene00002087	INSulin related /// locus:ins-4
174505_at	1.43843	0.039918	T28C6.8	T28C6.8 /// WBGene00012122	hypothetical protein /// status:Confirmed
190759_at	1.43811	0.14889	C25A8.5	C25A8.5 /// WBGene00016085	hypothetical protein /// protein-tyrosine kinase
181552_at	1.43782	0.087647	T22B7.3	T22B7.3 /// WBGene00020672	hypothetical protein /// status:Partially_confirmed
174628_s_at	1.43728	0.1479	H03E18.1	H03E18.1 /// WBGene00019148	hypothetical protein /// status:Partially_confirmed
174879_at	1.43723	0.32624	T20B5.1	apa-2 /// WBGene00000161	AdaPtin, Alpha chain (clathrin associated complex) /// locus:apa-2
190311_s_at	1.43709	0.007819	C45B11.3	dhs-18 /// WBGene00000981	DeHydrogenases, Short chain /// locus:dhs-18
193123_s_at	1.43645	0.18698	F58G1.3	F58G1.3 /// WBGene00010265	hypothetical protein /// Protein phosphatase-1 (PP1) (2 domains)
191552_s_at	1.43525	0.040884	R10H10.2	spe-26 /// WBGene00004972	defective SPErmatogenesis /// locus:spe-26
191903_s_at	1.43371	0.000717	W03F11.4	W03F11.4 /// WBGene00021007	hypothetical protein /// protein-tyrosine phosphatase
178449_at	1.43293	0.045461	C53B4.8	C53B4.8	hypothetical protein
190427_s_at	1.43281	0.002133	C54F6.14	ftn-1 /// WBGene00001500	FerriTiN /// locus:ftn-1
188729_at	1.43281	0.015388	C25G4.4	tag-347 /// WBGene00007732	Temporarily Assigned Gene name /// locus:tag-347
190177_at	1.43213	0.086158	R05H10.6	cdh-7 /// WBGene00000399	CaDHerin family /// locus:cdh-7
186492_s_at	1.43197	0.001169	F15E11.1 /// F15E11.14	F15E11.1 /// F15E11.14 /// WBGene00017490 /// WBGene00017500	hypothetical protein /// hypothetical protein /// status:Predicted /// status:Partially_confirmed
179751_at	1.43175	0.1576	T08B6.4	T08B6.4 /// WBGene00020353	hypothetical protein /// status:Partially_confirmed
182663_at	1.43162	0.042534	F57F4.1	F57F4.1 /// WBGene00019015	hypothetical protein /// status:Partially_confirmed
190467_at	1.43114	0.039118	R90.4	ttr-29 /// WBGene00011286	TransThyretin-Related family domain /// locus:ttr-29
193966_s_at	1.43024	0.11328	T25B9.5 /// Y69E1A.3	T25B9.5 /// WBGene00012011 /// WBGene00013475 /// Y69E1A.3	hypothetical protein /// Src homology domain 2, protein tyrosine kinase (ABL subfamily) /// Eukaryotic protein kinase domain /// hypothetical protein
176763_at	1.42877	0.077308	C50E10.1	C50E10.1 /// WBGene00016825	hypothetical protein /// status:Confirmed
182978_at	1.42841	0.10904	F41C6.6	F41C6.6 /// WBGene00018279	hypothetical protein /// status:Partially_confirmed
183775_at	1.42686	0.12202	C34G6.6	noah-1	NOmpA Homolog (Drosophila nompA: no mechanoreceptor potential A)
189333_at	1.42507	0.054565	F33D11.7	F33D11.7 /// WBGene00018004	hypothetical protein /// protein kinase
177060_s_at	1.425	0.027136	Y46C8AL.5	clec-72 /// WBGene00021583	C-type LECtin /// locus:clec-72
191579_at	1.42425	0.13253	C43F9.6	C43F9.6 /// WBGene00008074	hypothetical protein /// locus:nkb-2
194016_at	1.42411	0.026894	T04B2.2	frk-1 /// WBGene00001487	Fer oncogene Related Kinase /// locus:frk-1
172713_x_at	1.42365	0.00587	C03G5.10 /// C03G5.11 /// C03G5.12 /// C03G5.13 /// C03G5.8 /// C03G5.9 /// F42F12.1 /// F42F12.10 /// F42F12.13 /// F42F12.6 /// F42F12.7 /// F42F12.8 /// F42F12.9	nspc-1 /// nspc-10 /// nspc-12 /// nspc-13 /// nspc-14 /// nspc-15 /// nspc-2 /// nspc-3 /// nspc-4 /// nspc-5 /// nspc-6 /// nspc-9 /// WBGene00009634 /// WBGene00009637 /// WBGene00009638 /// WBGene00009639 /// WBGene00009640 /// WBGene00023477 /// WBGene00023493 /// WBGene00044337 /// WBGene00044338 /// WBGene00044339 /// WBGene00044340 /// WBGene00044357	Nematode Specific Peptide family, group C /// Nematode Specific Peptide family, group C /// Nematode Specific Peptide family, group C /// Nematode Specific Peptide family, group C /// Nematode Specific Peptide family, group C /// Nematode Specific Peptide family, group C /// Nematode Specific Peptide family, group C /// Nematode Specific Peptide family, group C /// Nematode Specific Peptide famil…
194014_s_at	1.42266	0.046304	F28H6.1	akt-2	AKT kinase family
177957_at	1.4222	0.023884	C52E4.7	C52E4.7 /// WBGene00008259	hypothetical protein /// status:Confirmed
178898_at	1.42218	0.039462	F55C9.3	F55C9.3 /// WBGene00010100	hypothetical protein /// status:Partially_confirmed
184169_s_at	1.42102	0.35015	C01G12.3	C01G12.3 /// WBGene00007244	hypothetical protein /// status:Confirmed
178104_at	1.4204	0.017029	W06D4.2	W06D4.2 /// WBGene00012296	hypothetical protein /// status:Confirmed
175016_s_at	1.42032	0.17098	F44E2.4	F44E2.4 /// WBGene00018418	hypothetical protein /// status:Partially_confirmed
186571_at	1.42012	0.079939	Y106G6H.13	WBGene00013723 /// Y106G6H.13	status:Confirmed /// hypothetical protein
180627_at	1.4193	0.33783	K04F1.9	K04F1.9 /// WBGene00019388	hypothetical protein /// status:Confirmed
172417_x_at	1.41813	0.28409	F38A5.12 /// F38A5.5	nspb-3 /// WBGene00018162 /// WBGene00018169	Nematode Specific Peptide family, group B /// locus:nspb-3 /// locus:nspb-2
177556_at	1.41787	0.021152	F35H8.2	F35H8.2 /// WBGene00009447	hypothetical protein /// status:Partially_confirmed
193953_s_at	1.41762	0.006342	C49C3.1	snf-9 /// WBGene00004908	Sodium:Neurotransmitter symporter Family /// locus:snf-9
193900_at	1.41674	0.031442	Y75B8A.4	WBGene00013541 /// Y75B8A.4	ATPases associated with various cellular activities (AAA) /// hypothetical protein
187703_s_at	1.41518	0.017671	C12C8.3	lin-41	abnormal cell LINeage
185383_at	1.41509	0.010735	C41D11.3	C41D11.3	hypothetical protein
177319_s_at	1.41359	0.023387	M70.1	M70.1 /// WBGene00019783	hypothetical protein /// status:Partially_confirmed
173698_s_at	1.41358	0.02085	F01D5.9	cyp-37A1 /// WBGene00008499	CYtochrome P450 family /// locus:cyp-37A1
187028_s_at	1.41233	0.037411	C33E10.10 /// T25G12.2	C33E10.10 /// dehydrogenase /// WBGene00016350 /// WBGene00020810	hypothetical protein /// hypothetical protein /// status:Partially_confirmed /// dehydrogenase
190131_s_at	1.4118	0.012021	F01G10.2	ech-8 /// WBGene00001157	Enoyl-CoA Hydratase /// locus:ech-8
177916_at	1.4116	0.14105	W04G3.3	lpr-4 /// WBGene00012257	LiPocalin-Related protein /// locus:lpr-4
172537_x_at	1.41157	0.059427	Y45F10B.3	WBGene00012871 /// Y45F10B.3	status:Partially_confirmed /// hypothetical protein
172562_x_at	1.41149	0.37216	---	---	---
172859_x_at	1.41128	0.021164	C07E3.4	C07E3.4 /// WBGene00007415	hypothetical protein /// Protein-tyrosine phosphatase
181567_at	1.41011	0.097475	F10D11.3	F10D11.3 /// WBGene00008649	hypothetical protein /// status:Partially_confirmed
183894_at	1.40994	0.022302	C17C3.3	C17C3.3 /// WBGene00015889	hypothetical protein /// status:Partially_confirmed
173573_s_at	1.40761	0.002741	Y75B7B.2	WBGene00022289 /// Y75B7B.2	status:Partially_confirmed /// hypothetical protein
185168_s_at	1.40713	0.005323	Y116A8A.4 /// Y116A8A.6	WBGene00013775 /// WBGene00013776 /// Y116A8A.4 /// Y116A8A.6	status:Partially_confirmed /// status:Partially_confirmed /// hypothetical protein /// hypothetical protein
188560_at	1.40704	0.083608	C06E7.6	spe-27 /// WBGene00004973	defective SPErmatogenesis /// locus:spe-27
179034_s_at	1.40658	0.18255	M03B6.3	M03B6.3 /// WBGene00010835	hypothetical protein /// status:Confirmed
179285_at	1.40648	0.061281	ZK669.3	WBGene00014053 /// ZK669.3	status:Confirmed /// hypothetical protein
188170_at	1.40592	0.10222	F55F8.1	ptr-10 /// WBGene00004224	PaTched Related family /// locus:ptr-10
177910_at	1.40537	0.10649	C54G4.3	C54G4.3 /// WBGene00008313	hypothetical protein /// status:Partially_confirmed
191223_at	1.40531	0.11531	ZK507.1	WBGene00013978 /// ZK507.1	serine/threonine kinase /// hypothetical protein
190064_at	1.4048	0.086616	T05G5.2	hlh-4 /// WBGene00001951	Helix Loop Helix /// locus:hlh-4
184971_at	1.4047	0.19044	C46E10.1	C46E10.1 /// WBGene00016707	hypothetical protein /// status:Partially_confirmed
186093_at	1.40426	0.032036	Y25C1A.1	clec-123 /// WBGene00021288	C-type LECtin /// locus:clec-123
193583_at	1.40392	0.014362	ZK520.5	cyn-2 /// WBGene00000878	CYclophyliN /// locus:cyn-2
184224_at	1.40391	0.22973	Y45F10D.6	WBGene00012886 /// Y45F10D.6	status:Predicted /// hypothetical protein
189109_s_at	1.40388	0.018128	C34B2.3 /// F33D11.7	C34B2.3 /// F33D11.7 /// WBGene00016388 /// WBGene00018004	hypothetical protein /// hypothetical protein /// protein kinase /// protein kinase
174697_at	1.40329	0.059489	F35D2.3	F35D2.3 /// WBGene00018041	hypothetical protein /// status:Confirmed
189646_at	1.40307	0.10128	K09C4.5	K09C4.5 /// WBGene00019550	hypothetical protein /// sugar transporter
179988_s_at	1.40306	0.024452	F42G4.6 /// Y81G3A.1	F42G4.6 /// WBGene00009643 /// WBGene00013590 /// Y81G3A.1	hypothetical protein /// status:Partially_confirmed /// status:Predicted /// hypothetical protein
193164_at	1.40243	0.028329	C37E2.2	C37E2.2	hypothetical protein
187507_at	1.40095	0.11829	C32D5.4	C32D5.4 /// WBGene00016312	hypothetical protein /// status:Partially_confirmed
189768_at	1.40036	0.074357	F32H2.5	fasn-1 /// WBGene00009342	Fatty Acid SyNthase /// locus:fasn-1
186953_at	1.40025	0.11323	Y71F9AL.7	WBGene00022112 /// Y71F9AL.7	status:Partially_confirmed /// hypothetical protein
193450_at	1.3996	0.009618	ZK1010.9	snf-7 /// WBGene00004906	Sodium:Neurotransmitter symporter Family /// locus:snf-7
177796_at	1.39834	0.06152	C11H1.9	C11H1.9	hypothetical protein
185211_at	1.39826	0.20887	K08D10.8	scrm-5 /// WBGene00019531	SCRaMblase (phospholipid scramblase) /// locus:scrm-5
186491_at	1.39825	0.042104	ZK945.7	WBGene00014169 /// ZK945.7	status:Confirmed /// hypothetical protein
187552_s_at	1.39815	0.067391	C45G9.4 /// C45G9.9	C45G9.4 /// C45G9.9 /// WBGene00016675 /// WBGene00016680	hypothetical protein /// hypothetical protein /// status:Partially_confirmed /// status:Partially_confirmed
183597_at	1.39733	0.070395	F58E10.4	aip-1 /// WBGene00000097	Arsenite Inducible Protein /// locus:aip-1
175759_at	1.39677	0.055453	C32D5.2	sma-6 /// WBGene00004860	SMAll /// locus:sma-6
183334_at	1.39628	0.31847	C16B8.2	C16B8.2 /// WBGene00015822	hypothetical protein /// status:Partially_confirmed
190627_at	1.39565	0.034896	K05F1.3	acdh-8 /// WBGene00019406	Acyl CoA DeHydrogenase /// locus:acdh-8
193285_s_at	1.39562	0.002085	F36D3.5 /// T08G3.7	F36D3.5 /// T08G3.7 /// WBGene00009471 /// WBGene00011619	hypothetical protein /// hypothetical protein /// Ank repeat /// Ank repeat, BRCA1 C Terminus (BRCT) domain
177666_at	1.3956	0.002103	D1086.5	D1086.5 /// WBGene00008392	hypothetical protein /// status:Confirmed
181760_s_at	1.3943	0.041864	F32A11.3	F32A11.3 /// WBGene00009308	hypothetical protein /// status:Confirmed
173230_s_at	1.39399	0.003031	Y46G5A.30	snf-5 /// WBGene00004904	Sodium:Neurotransmitter symporter Family /// locus:snf-5
173844_s_at	1.39304	0.015415	Y22D7AL.9	WBGene00021247 /// Y22D7AL.9	status:Partially_confirmed /// hypothetical protein
183544_at	1.39289	0.44936	K03H6.4	K03H6.4 /// WBGene00019369	hypothetical protein /// status:Partially_confirmed
178571_s_at	1.39229	0.14292	C37A5.2 /// C37A5.4	fipr-22 /// fipr-23 /// WBGene00007989 /// WBGene00007990	FIP (Fungus-Induced Protein) Related /// FIP (Fungus-Induced Protein) Related /// locus:fipr-22 /// locus:fipr-23
189549_at	1.39156	0.21101	T06A4.1	carboxypeptidase	hypothetical protein
174008_at	1.3907	0.12117	C34F6.1	C34F6.1 /// WBGene00007938	hypothetical protein /// Kunitz/Bovine pancreatic trypsin inhibitor domain (8 domains)
181192_at	1.39046	0.063206	F36A2.11	F36A2.11 /// WBGene00009458	hypothetical protein /// status:Confirmed
178757_at	1.39034	0.055879	F19H8.4	F19H8.4 /// WBGene00008964	hypothetical protein /// status:Confirmed
188014_s_at	1.39033	0.026619	F32B6.7 /// T13F2.12	ssp-32 /// T13F2.12 /// WBGene00006049 /// WBGene00011749	Sperm-Specific family, class P /// hypothetical protein /// locus:ssp-32 /// status:Confirmed
179491_at	1.38854	0.072141	ZK669.2	WBGene00014052 /// ZK669.2	status:Partially_confirmed /// hypothetical protein
171926_x_at	1.38849	0.005619	M03A8.1	dhs-28 /// WBGene00000991	DeHydrogenases, Short chain /// locus:dhs-28
184934_s_at	1.38829	0.21681	H06H21.9	H06H21.9 /// WBGene00019165	hypothetical protein /// status:Partially_confirmed
188893_at	1.38667	0.008164	F54F3.4	dehydrogenase /// WBGene00010063	hypothetical protein /// dehydrogenase
190450_s_at	1.38638	0.12036	F09C8.1	F09C8.1 /// WBGene00008621	hypothetical protein /// phospholipase precursor
190166_at	1.38586	0.033857	T01B11.4	ant-1.44 /// WBGene00020140	Adenine Nucleotide Translocator /// locus:ant-1.4
176658_at	1.3844	0.061974	AC7.3	AC7.3 /// WBGene00014997	hypothetical protein /// status:Partially_confirmed
184662_at	1.38382	0.15948	Y46G5A.29	WBGene00012917 /// Y46G5A.29	status:Partially_confirmed /// hypothetical protein
173197_at	1.38298	0.050049	---	kin-1	Protein KINase family member (kin-1) (kin-1)
173550_at	1.38268	0.017671	F45D3.4	F45D3.4	hypothetical protein
180861_at	1.38209	0.017116	C08G9.2	C08G9.2 /// WBGene00015620	hypothetical protein /// status:Partially_confirmed
191984_at	1.3818	0.078926	R06B10.1	R06B10.1 /// WBGene00019912	hypothetical protein /// protein-tyrosine phosphatase
173944_at	1.38138	0.033893	K10D3.4	K10D3.4 /// WBGene00010738	hypothetical protein /// serine proteinase inhibitor (kunitz type)
173866_s_at	1.38133	0.082902	F27C8.5	F27C8.5 /// WBGene00009185	hypothetical protein /// BTB (also known as BR-C/Ttk) domain.
179228_at	1.38074	0.028744	R07H5.4	sdz-27 /// WBGene00011124	SKN-1 Dependent Zygotic transcript /// locus:sdz-27
190050_at	1.38035	0.038535	C14C6.4	nhr-155 /// WBGene00015758	Nuclear Hormone Receptor family /// locus:nhr-155
190717_s_at	1.38006	0.013558	Y38H8A.4	WBGene00012638 /// Y38H8A.4	serine/threonine kinase /// hypothetical protein
181008_at	1.3791	0.051897	C15C6.2	C15C6.2	hypothetical protein
186153_s_at	1.37856	0.18156	T27A10.7	cgr-1 /// WBGene00020847	CRAL/TRIO and GOLD domain suppressor of activated Ras /// locus:cgr-1
180072_s_at	1.37851	0.031756	F13D12.9	F13D12.9 /// WBGene00008743	hypothetical protein /// status:Partially_confirmed
186452_at	1.37741	0.081913	ZC190.10	WBGene00022544 /// ZC190.10	status:Partially_confirmed /// hypothetical protein
191333_at	1.37568	0.028267	Y51A2D.11	ttr-26 /// WBGene00013079	TransThyretin-Related family domain /// locus:ttr-26
186607_s_at	1.37532	0.06872	Y59E9AR.2 /// Y59E9AR.8	WBGene00021998 /// WBGene00022003 /// Y59E9AR.2 /// Y59E9AR.8	status:Predicted /// status:Partially_confirmed /// hypothetical protein /// hypothetical protein
174073_at	1.37501	0.003438	F09E10.11	---	---
171902_x_at	1.37496	0.12298	R05C11.3	ATPase /// WBGene00019875	hypothetical protein /// locus:mca-2
188200_at	1.37371	0.159	T14B4.7	dpy-10	DumPY : shorter than wild-type
174389_s_at	1.3735	0.10232	K02E10.4	K02E10.4	hypothetical protein
183107_at	1.37304	0.056165	ZC513.3	WBGene00022628 /// ZC513.3	status:Partially_confirmed /// hypothetical protein
177836_s_at	1.37277	0.075568	R10E9.2	R10E9.2 /// WBGene00011214	hypothetical protein /// status:Confirmed
179673_at	1.3723	0.0543	T25B9.6	T25B9.6 /// WBGene00012012	hypothetical protein /// status:Partially_confirmed
185910_at	1.37144	0.022015	cTel54X.1	fbxa-6 /// WBGene00008352	F-box A protein /// locus:fbxa-6
175671_at	1.3714	0.16113	ZK899.8	gap-2	GTPase Activating Protein family
185608_at	1.36994	0.1077	H03E18.1	H03E18.1 /// WBGene00019148	hypothetical protein /// status:Partially_confirmed
192051_at	1.36852	0.026542	Y71F9AL.4	WBGene00022110 /// Y71F9AL.4	protein-tyrosine phosphatase /// hypothetical protein
192020_at	1.36818	0.1785	Y57G11C.6	WBGene00013304 /// Y57G11C.6	protein-tyrosine phosphatase /// hypothetical protein
178819_s_at	1.36684	0.005028	F44G3.7	F44G3.7 /// WBGene00009708	hypothetical protein /// status:Partially_confirmed
178409_s_at	1.36611	0.019609	F58B3.3	lys-6 /// WBGene00003095	LYSozyme /// locus:lys-6
194071_at	1.36587	0.014533	T13H10.1	kin-5 /// WBGene00002193	protein KINase /// locus:kin-5
179453_s_at	1.36536	0.025511	C01G10.14 /// C25D7.1	C01G10.14 /// C25D7.1 /// WBGene00007239 /// WBGene00007714	hypothetical protein /// hypothetical protein /// status:Confirmed /// status:Partially_confirmed
186652_at	1.36379	0.032655	ZK512.8	WBGene00013987 /// ZK512.8	status:Confirmed /// hypothetical protein
192281_at	1.36295	0.43105	F41C3.3	acs-11 /// WBGene00018269	fatty Acid CoA Synthetase family /// locus:acs-11
194147_x_at	1.36202	0.16177	ZK909.2	kin-1	protein KINase
189825_at	1.36114	0.017898	C08F8.7	rap-3 /// WBGene00004309	RAP homolog (vertebrate Rap GTPase family) /// locus:rap-3
182589_s_at	1.35951	0.44639	Y43F8C.3	WBGene00012825 /// Y43F8C.3	status:Partially_confirmed /// hypothetical protein
183870_at	1.3595	0.006087	C01G10.18 /// C01G10.5	C01G10.18 /// C01G10.5 /// WBGene00007232 /// WBGene00077583	hypothetical protein /// hypothetical protein /// status:Partially_confirmed /// status:Predicted
174650_at	1.35935	0.24528	F49E10.2	F49E10.2	hypothetical protein
193472_at	1.35713	0.080204	ZK524.1	spe-4 /// WBGene00004958	defective SPErmatogenesis /// locus:spe-4
179653_at	1.35676	0.030109	ZK930.4	WBGene00014154 /// ZK930.4	status:Partially_confirmed /// hypothetical protein
174552_s_at	1.35664	0.033096	K08H10.1 /// K08H10.2	lea-1 /// WBGene00002263	plant Late Embryo Abundant (LEA) related /// locus:lea-1
184676_s_at	1.35624	0.13102	ZK1290.8	WBGene00006956 /// wrt-10	locus:wrt-10 /// WaRThog (hedgehog-like family)
177463_at	1.35581	0.019506	ZK6.10	dod-19 /// WBGene00022644	Downstream Of DAF-16 (regulated by DAF-16) /// locus:dod-19
180008_at	1.35563	0.050794	K06A1.2	K06A1.2 /// WBGene00019425	hypothetical protein /// status:Partially_confirmed
192309_at	1.35447	0.26458	R06A4.10	acr-20	AcetylCholine Receptor
185617_at	1.35444	0.024777	Y51H7C.8	WBGene00021786 /// Y51H7C.8	status:Predicted /// hypothetical protein
184280_at	1.35397	0.037334	C16C8.18	C16C8.18 /// WBGene00015855	hypothetical protein /// status:Partially_confirmed
192645_at	1.35339	0.037037	F46G10.6	mxl-3 /// WBGene00003511	MaX-Like /// locus:mxl-3
181847_s_at	1.3521	0.072107	C26D10.5 /// C26D10.7	C26D10.7 /// eff-1 /// WBGene00023420	hypothetical protein /// Epithelial Fusion Failure /// status:Predicted
177840_at	1.35193	0.10299	C53B4.2	C53B4.2 /// WBGene00008272	hypothetical protein /// status:Partially_confirmed
183149_at	1.35193	0.5	R03H4.6	R03H4.6 /// WBGene00044617	hypothetical protein /// locus:bus-1
185591_at	1.35165	0.005106	H41C03.1	H41C03.1 /// WBGene00019268	hypothetical protein /// status:Partially_confirmed
191565_at	1.35151	0.054992	F25H5.7	F25H5.7 /// WBGene00009129	hypothetical protein /// Protein-tyrosine phosphatase
187722_at	1.35119	0.10708	K01C8.3	tdc-1	Tyrosine DeCarboxylase
180608_at	1.35082	0.16525	R08C7.5	R08C7.5 /// WBGene00019949	hypothetical protein /// status:Partially_confirmed
181966_s_at	1.35033	0.06212	K02F6.7	K02F6.7 /// WBGene00019341	hypothetical protein /// status:Partially_confirmed
182319_s_at	1.34999	0.012748	T21G5.4	T21G5.4 /// WBGene00020661	hypothetical protein /// status:Confirmed
177803_at	1.34951	0.028036	F36D3.8	F36D3.8 /// WBGene00009473	hypothetical protein /// status:Partially_confirmed
182863_at	1.34944	0.048022	F35D2.3	F35D2.3 /// WBGene00018041	hypothetical protein /// status:Confirmed
174240_at	1.34936	0.16153	C34G6.6	noah-1	NOmpA Homolog (Drosophila nompA: no mechanoreceptor potential A)
189126_s_at	1.34928	0.036169	C05E4.14	srh-2	Serpentine Receptor, class H
178552_at	1.34927	0.07461	C33B4.2	C33B4.2 /// WBGene00007891	hypothetical protein /// status:Partially_confirmed
181886_at	1.34901	0.069078	Y37D8A.8	WBGene00012549 /// Y37D8A.8	status:Partially_confirmed /// hypothetical protein
181963_at	1.34896	0.12218	C23H3.9	C23H3.9	hypothetical protein
186275_s_at	1.34848	0.14657	Y47D3A.10	tbx-34 /// WBGene00006553	T BoX family /// locus:tbx-34
192499_at	1.34796	0.003854	E04F6.3	maoc-1 /// WBGene00017123	MAO-C-like dehydratase domain /// locus:maoc-1
184642_at	1.34746	0.064555	Y52B11A.1	spe-38 /// WBGene00013121	defective SPErmatogenesis /// locus:spe-38
182935_at	1.34732	0.031197	F36A4.3	F36A4.3 /// WBGene00018082	hypothetical protein /// status:Partially_confirmed
181050_at	1.3471	0.033233	C50C3.2	C50C3.2 /// WBGene00016800	hypothetical protein /// Spectrin alpha chain
185167_at	1.34688	0.02085	Y116A8A.4	WBGene00013775 /// Y116A8A.4	status:Partially_confirmed /// hypothetical protein
188177_at	1.34644	0.20766	K04A8.5	lipase /// WBGene00019376	hypothetical protein /// lipase
184713_at	1.34619	0.099049	F35F10.5	F35F10.5 /// WBGene00018055	hypothetical protein /// status:Partially_confirmed
171848_x_at	1.34512	0.09183	K01C8.3	tdc-1	Tyrosine DeCarboxylase
182164_s_at	1.3447	0.041001	C43H6.4	C43H6.4 /// WBGene00016617	hypothetical protein /// status:Partially_confirmed
179757_at	1.34449	0.46319	C25A8.2 /// R02D5.7	C25A8.2 /// R02D5.7 /// WBGene00010980 /// WBGene00016083	hypothetical protein /// hypothetical protein /// status:Confirmed /// status:Partially_confirmed
172234_x_at	1.34365	0.04641	C41G7.6	C41G7.6 /// WBGene00008063	hypothetical protein /// status:Confirmed
175015_at	1.34362	0.12413	F44E2.4	F44E2.4 /// WBGene00018418	hypothetical protein /// status:Partially_confirmed
172354_x_at	1.34362	0.38535	ZK757.3	tag-76	Temporarily Assigned Gene name
192321_s_at	1.34311	0.009333	F46G11.3	tag-257 /// WBGene00018516	Temporarily Assigned Gene name /// locus:tag-257
173646_at	1.34088	0.031707	C52B9.8	helicase /// WBGene00016868	hypothetical protein /// helicase
178182_at	1.34054	0.10281	F44G4.5	F44G4.5 /// WBGene00009714	hypothetical protein /// status:Partially_confirmed
180843_at	1.34026	0.013	W03G1.2	W03G1.2 /// WBGene00021010	hypothetical protein /// status:Partially_confirmed
176395_at	1.34011	0.22623	Y71G12B.18	WBGene00022156 /// Y71G12B.18	status:Partially_confirmed /// hypothetical protein
184655_at	1.33986	0.005912	T21E12.5	T21E12.5 /// WBGene00020656	hypothetical protein /// status:Partially_confirmed
190902_at	1.33967	0.084014	R10D12.10	R10D12.10 /// WBGene00011191	hypothetical protein /// serine/threonine kinase
190509_at	1.33966	0.040126	C53A5.4	tag-191 /// WBGene00007049	Temporarily Assigned Gene name /// locus:tag-191
180665_at	1.33951	0.26541	D2021.4	D2021.4	hypothetical protein
178687_at	1.33934	0.022233	F15H9.1	F15H9.1 /// WBGene00008870	hypothetical protein /// status:Partially_confirmed
186734_s_at	1.33933	0.002933	Y105C5B.28	gln-3	GLutamiNe synthetase (glutamate-ammonia ligase)
177874_s_at	1.33812	0.11521	F32B6.5 /// T13F2.9	sss-1 /// T13F2.9 /// WBGene00006056	Sperm-Specific family, class S /// hypothetical protein /// locus:sss-1
185275_at	1.33809	0.15189	K01D12.14	cdr-5 /// WBGene00010473	CaDmium Responsive /// locus:cdr-5
179907_at	1.33799	0.012792	T20H4.2	T20H4.2 /// WBGene00020635	hypothetical protein /// status:Partially_confirmed
186372_at	1.33793	0.032063	F09E10.8	toca-1	TOCA (Transducer Of Cdc42-dependent Actin assembly) homolog
192578_at	1.33783	0.059547	F10D2.9	fat-7 /// WBGene00001399	FATty acid desaturase /// locus:fat-7
191409_at	1.33673	0.41117	F09F3.13	srx-137 /// WBGene00006028	Serpentine Receptor, class X /// locus:srx-137
185888_at	1.33611	0.045933	C24A11.1	C24A11.1 /// WBGene00016040	hypothetical protein /// status:Confirmed
177724_at	1.33498	0.029871	W04G3.1	W04G3.1	hypothetical protein
187219_at	1.33462	0.086446	C34C12.6	C34C12.6 /// WBGene00007925	hypothetical protein /// status:Partially_confirmed
176191_at	1.33422	0.48206	Y71H2AM.7	WBGene00022172 /// Y71H2AM.7	status:Confirmed /// hypothetical protein
189164_at	1.33414	0.055764	F58B3.8	dsl-5 /// WBGene00001107	Delta/Serrate/Lag-2 domain /// locus:dsl-5
184110_at	1.33412	0.028689	Y87G2A.9	ubc-14 /// WBGene00006709	UBiquitin Conjugating enzyme /// locus:ubc-14
172240_x_at	1.33382	0.15148	F53H2.2	cnc-7 /// WBGene00010005	CaeNaCin (Caenorhabditis bacteriocin) /// locus:cnc-7
174169_at	1.3331	0.021356	F08B1.2	gcy-12 /// WBGene00001538	Guanylyl CYclase /// locus:gcy-12
185492_at	1.33277	0.050658	K02E10.4	K02E10.4	hypothetical protein
173398_s_at	1.3326	0.16349	F53H2.2	cnc-7 /// WBGene00010005	CaeNaCin (Caenorhabditis bacteriocin) /// locus:cnc-7
177500_at	1.33259	0.017463	C04G2.5	C04G2.5 /// WBGene00007306	hypothetical protein /// status:Partially_confirmed
174245_at	1.33163	0.037348	D1037.5	phospholipase /// WBGene00017026	hypothetical protein /// phospholipase
182515_at	1.33162	0.14167	F13B9.2	F13B9.2 /// WBGene00017420	hypothetical protein /// status:Partially_confirmed
182257_at	1.3313	0.10147	T22A3.8	lam-3 /// WBGene00002248	LAMinin related. See also lmb- /// locus:lam-3
182902_at	1.33057	0.061095	F36A4.4	F36A4.4 /// WBGene00018083	hypothetical protein /// status:Partially_confirmed
189199_s_at	1.33034	0.074924	ZK354.2	ZK354.2	hypothetical protein
186995_at	1.32981	0.083397	Y65B4BR.2	lpr-1 /// WBGene00002393	LiPocalin-Related protein /// locus:lpr-1
173758_at	1.32956	0.47007	T24G10.2	T24G10.2 /// WBGene00020779	hypothetical protein /// status:Confirmed
187964_at	1.32912	0.15795	F54F3.3	lipase /// WBGene00010062	hypothetical protein /// lipase
189215_at	1.3288	0.057587	F23C8.7	F23C8.7 /// WBGene00017736	hypothetical protein /// protein kinase
189254_s_at	1.3282	0.00769	T16H12.6	kel-10 /// WBGene00002186	KELch-repeat containing protein /// locus:kel-10
179564_at	1.32665	0.084535	T22B3.3	T22B3.3 /// WBGene00011911	hypothetical protein /// status:Partially_confirmed
177272_at	1.32644	0.037735	Y37E11AL.2	WBGene00021358 /// Y37E11AL.2	status:Confirmed /// hypothetical protein
178813_at	1.32622	0.018875	C47B2.8	prx-11 /// WBGene00004196	PeRoXisome assembly factor /// locus:prx-11
173254_at	1.32617	0.29893	Y48G8AL.6	smg-2 /// WBGene00004880	Suppressor with Morphological effect on Genitalia /// locus:smg-2
187282_at	1.32611	0.10357	F22B7.9	F22B7.9 /// WBGene00017698	hypothetical protein /// status:Confirmed
186772_at	1.32571	0.13431	C15H7.4	C15H7.4 /// WBGene00007611	hypothetical protein /// status:Partially_confirmed
190861_at	1.32502	0.1665	C05D11.6	nas-4 /// WBGene00003523	Nematode AStacin protease /// locus:nas-4
181237_at	1.32488	0.10688	F22F7.3	F22F7.3 /// WBGene00017721	hypothetical protein /// status:Partially_confirmed
183440_s_at	1.32434	0.029004	R09A1.3	R09A1.3 /// WBGene00019973	hypothetical protein /// status:Partially_confirmed
193344_at	1.32314	0.11153	C44H4.3	sym-1 /// WBGene00006366	SYnthetic lethal with Mec /// locus:sym-1
186720_at	1.32304	0.004505	T28A11.19	T28A11.19 /// WBGene00020881	hypothetical protein /// status:Partially_confirmed
182386_s_at	1.32258	0.2424	Y37A1B.7	WBGene00012540 /// Y37A1B.7	status:Partially_confirmed /// hypothetical protein
192509_at	1.32186	0.1488	ZK666.6	clec-60 /// WBGene00014046	C-type LECtin /// locus:clec-60
189283_s_at	1.32116	0.011382	C06B3.3	cyp-35C1 /// WBGene00007362	CYtochrome P450 family /// locus:cyp-35C1
179713_at	1.32002	0.22111	F46B6.11	sru-39 /// WBGene00005702	Serpentine Receptor, class U /// locus:sru-39
187044_at	1.31959	0.067416	K04H4.5	K04H4.5 /// WBGene00010574	hypothetical protein /// status:Partially_confirmed
178443_s_at	1.31948	0.007404	F57G4.7	---	---
192497_at	1.31946	0.39941	R04B5.3	nhr-205 /// WBGene00011002	Nuclear Hormone Receptor family /// locus:nhr-205
192756_s_at	1.31852	0.021236	K11H3.1	gpdh-2	Glycerol-3-Phosphate DeHydrogenase
186336_at	1.31815	0.008629	Y38H6C.15	WBGene00012627 /// Y38H6C.15	status:Partially_confirmed /// hypothetical protein
176571_at	1.31741	0.026256	F09G8.4	ncr-2 /// WBGene00003562	NPC1 (human Niemann Pick C disease) Related /// locus:ncr-2
181130_s_at	1.31652	0.069329	T16A9.5 /// Y69E1A.1	T16A9.5 /// WBGene00011795 /// WBGene00013473 /// Y69E1A.1	hypothetical protein /// status:Confirmed /// status:Confirmed /// hypothetical protein
193061_at	1.31643	0.020628	ZK849.1	WBGene00014100 /// ZK849.1	PDZ domain (Also known as DHR or GLGF). /// hypothetical protein
185768_at	1.31626	0.10151	F59E12.3	F59E12.3 /// WBGene00019119	hypothetical protein /// status:Partially_confirmed
177501_at	1.31615	0.033987	F42G4.2	F42G4.2 /// WBGene00009641	hypothetical protein /// status:Confirmed
194144_s_at	1.31566	0.092466	T25G12.4	rab-6.2 /// WBGene00004270	RAB family /// locus:rab-6.2
173796_at	1.3153	0.070695	B0303.14	B0303.14 /// WBGene00015132	hypothetical protein /// Giant secretory protein I-C
189645_s_at	1.31458	0.030288	F39G3.7	prx-6 /// WBGene00004195	PeRoXisome assembly factor /// locus:prx-6
179224_s_at	1.31381	0.00027	B0024.8	che-12 /// WBGene00000491	abnormal CHEmotaxis /// locus:che-12
171980_x_at	1.3138	0.071972	T22B3.2 /// ZK757.3	T22B3.2 /// tag-76	hypothetical protein /// Temporarily Assigned Gene name
181587_at	1.31352	0.011041	R01H10.4	R01H10.4 /// WBGene00010972	hypothetical protein /// status:Confirmed
188678_at	1.31348	0.066245	C09H5.7	phophatase /// WBGene00015661	hypothetical protein /// phophatase
191742_s_at	1.31245	0.16403	H06O01.4 /// M05B5.1	M05B5.1 /// WBGene00010869	hypothetical protein /// protein-tyrosine phosphatase
186443_at	1.31193	0.050045	F42A10.7	F42A10.7 /// WBGene00018343	hypothetical protein /// status:Confirmed
172874_x_at	1.3117	0.018642	F07B7.11 /// F07B7.4 /// F45F2.12 /// K06C4.12 /// K06C4.4	his-8 /// WBGene00001882 /// WBGene00001894 /// WBGene00001896 /// WBGene00001926 /// WBGene00001928	HIStone /// locus:his-8 /// locus:his-20 /// locus:his-22 /// locus:his-52 /// locus:his-54
186489_s_at	1.31037	0.032926	ZK945.6	ZK945.6	hypothetical protein
189755_at	1.3099	0.05146	W01A11.1	W01A11.1 /// WBGene00020909	hypothetical protein /// epoxide hydrolase
180523_at	1.30936	0.07017	F47B10.5	F47B10.5 /// WBGene00009816	hypothetical protein /// status:Confirmed
183438_s_at	1.30915	0.081948	F45E4.8	nlp-20 /// WBGene00003758	Neuropeptide-Like Protein /// locus:nlp-20
177224_at	1.30908	0.019481	DY3.6	mfb-1 /// WBGene00008439	MAFBx (F-box protein) homolog /// locus:mfb-1
184688_at	1.30907	0.076052	Y49F6B.8	WBGene00021720 /// Y49F6B.8	status:Partially_confirmed /// hypothetical protein
185320_at	1.30901	0.20552	F41E6.10	fip-4 /// WBGene00018291	Fungus-Induced Protein /// locus:fip-4
191706_at	1.30849	0.12875	W01C9.4	W01C9.4 /// WBGene00012177	hypothetical protein /// 2,4-dienoyl-CoA reductase
173169_at	1.30827	0.39829	---	---	---
192761_s_at	1.30812	0.025866	T22C1.8	T22C1.8 /// WBGene00011918	hypothetical protein /// tyrosine specific protein phosphatase
191670_at	1.30781	0.080746	T09B9.2	T09B9.2 /// WBGene00011643	hypothetical protein /// Sodium/phosphate transporter
180286_at	1.30745	0.21117	W03D8.11	W03D8.11 /// WBGene00044796	hypothetical protein /// status:Partially_confirmed
185198_at	1.30742	0.041796	K09H11.1	K09H11.1 /// WBGene00019599	hypothetical protein /// status:Partially_confirmed
176264_at	1.30673	0.11613	F42H10.5	F42H10.5 /// WBGene00018369	hypothetical protein /// status:Partially_confirmed
178761_at	1.3067	0.12771	T02E1.6	T02E1.6 /// WBGene00011378	hypothetical protein /// status:Confirmed
171883_x_at	1.30657	0.052333	K02F6.7	K02F6.7 /// WBGene00019341	hypothetical protein /// status:Partially_confirmed
174781_at	1.30618	0.14992	T27A10.6	T27A10.6 /// WBGene00020846	hypothetical protein /// status:Confirmed
183231_at	1.30591	0.34595	K01A2.3	K01A2.3 /// WBGene00019278	hypothetical protein /// status:Partially_confirmed
190287_at	1.30513	0.071001	F16B4.12	nhr-117	Nuclear Hormone Receptor family
171730_x_at	1.30512	0.03479	F11C7.3	vap-1	Venom-Allergen-like Protein
177949_at	1.30472	0.00403	W01A8.1	mdt-28	MeDiaTor
194054_s_at	1.3046	0.035251	F08A8.3 /// F08A8.4	F08A8.3 /// F08A8.4 /// WBGene00008566 /// WBGene00008567	hypothetical protein /// hypothetical protein /// ACYL-COENZYME A OXIDASE, PEROXISOMAL (EC 1.3.3.6) (PALMITOYL-COA OXIDASE) (AOX) /// ACYL-COENZYME A OXIDASE, PEROXISOMAL (EC 1.3.3.6) (PALMITOYL-COA OXIDASE) (AOX)
190276_at	1.30399	0.009683	ZK1067.6	sym-2 /// WBGene00006367	SYnthetic lethal with Mec /// locus:sym-2
192146_s_at	1.3036	0.15285	F46C8.6	dpy-7 /// WBGene00001069	DumPY : shorter than wild-type /// locus:dpy-7
184162_at	1.3032	0.10829	T14B4.6	dpy-2 /// WBGene00001064	DumPY : shorter than wild-type /// locus:dpy-2
173687_s_at	1.30231	0.14927	R11A5.3	R11A5.3 /// WBGene00011231	hypothetical protein /// status:Confirmed
180210_s_at	1.30208	0.037762	Y20C6A.1	WBGene00012491 /// Y20C6A.1	status:Partially_confirmed /// hypothetical protein
191974_at	1.30199	0.070724	F55A3.6	F55A3.6 /// WBGene00018851	hypothetical protein /// nucleoside diphosphate kinase
184944_at	1.30137	0.008004	T06C10.3	T06C10.3 /// WBGene00020289	hypothetical protein /// status:Partially_confirmed
189720_s_at	1.30128	0.01699	W03C9.3	rab-7 /// WBGene00004271	RAB family /// locus:rab-7
185390_at	1.30097	0.41764	F49D11.6	F49D11.6 /// WBGene00018630	hypothetical protein /// status:Partially_confirmed
180639_at	1.30024	0.035739	K10C9.7	K10C9.7 /// WBGene00019626	hypothetical protein /// status:Confirmed
184786_at	1.30018	0.087152	Y49E10.17	fbxa-218 /// WBGene00013036	F-box A protein /// locus:fbxa-218
189372_s_at	1.29994	0.02318	Y32H12A.3	dhs-9 /// WBGene00000973	DeHydrogenases, Short chain /// locus:dhs-9
183851_at	1.29963	0.089413	D2062.7	D2062.7 /// WBGene00017059	hypothetical protein /// status:Confirmed
189407_at	1.29939	0.016762	F10D7.3	glutaredoxin /// WBGene00017340	hypothetical protein /// glutaredoxin
183328_at	1.29935	0.005756	Y38F1A.1	WBGene00012605 /// Y38F1A.1	status:Confirmed /// hypothetical protein
189102_at	1.2992	0.1144	C18H7.4	C18H7.4 /// WBGene00015994	hypothetical protein /// protein kinase
192974_at	1.29894	0.015847	W02D3.7	lbp-5 /// WBGene00002257	Lipid Binding Protein /// locus:lbp-5
176024_at	1.29894	0.052833	Y67D8B.3	---	---
188247_s_at	1.29854	0.077935	C10G11.8	ATPase /// WBGene00015688	hypothetical protein /// ATPase
180960_at	1.29812	0.089338	C13C12.2	C13C12.2 /// WBGene00007552	hypothetical protein /// status:Confirmed
187846_at	1.29742	0.097494	W03F11.5	W03F11.5 /// WBGene00021008	hypothetical protein /// status:Confirmed
180993_at	1.29739	0.017425	C31H1.1	C31H1.1 /// WBGene00016286	hypothetical protein /// status:Partially_confirmed
174294_at	1.29711	0.20183	C25F6.7	C25F6.7	hypothetical protein
190455_at	1.29707	0.21132	W01B6.5	W01B6.5 /// WBGene00012172	hypothetical protein /// tyrosine-protein kinase
192722_s_at	1.29693	0.12532	F25B3.4 /// ZK354.9	F25B3.4 /// WBGene00009101 /// WBGene00022710 /// ZK354.9	hypothetical protein /// serine/threonine protein phosphatase /// protein phosphatase /// hypothetical protein
174077_at	1.29689	0.00239	C05D9.9	C05D9.9	hypothetical protein
187395_s_at	1.29671	0.11628	B0361.6	B0361.6 /// WBGene00015160	hypothetical protein /// status:Confirmed
181688_at	1.29642	0.021965	W06D11.4	W06D11.4 /// WBGene00012302	hypothetical protein /// status:Predicted
177443_at	1.29608	0.26634	C54G4.2	C54G4.2 /// WBGene00008312	hypothetical protein /// status:Partially_confirmed
187484_at	1.29567	0.022354	B0252.5	B0252.5 /// WBGene00015089	hypothetical protein /// status:Partially_confirmed
191788_at	1.29563	0.019168	T27D12.1	T27D12.1 /// WBGene00012085	hypothetical protein /// sodium/phosphate transporter
181668_at	1.29527	0.004513	F25F8.1	F25F8.1 /// WBGene00017795	hypothetical protein /// status:Partially_confirmed
173682_at	1.29488	0.001882	M01H9.3	M01H9.3	hypothetical protein
180375_at	1.29447	0.075172	M03A1.7 /// M03A1.8	dao-2 /// M03A1.8 /// WBGene00000928 /// WBGene00077490	Dauer or Aging adult Overexpression /// hypothetical protein /// locus:dao-2 /// status:Confirmed
176474_at	1.29409	0.026355	Y54F10AM.6	WBGene00021850 /// Y54F10AM.6	status:Confirmed /// hypothetical protein
190975_at	1.29383	0.00122	F37B1.1	gst-24 /// WBGene00001772	Glutathione S-Transferase /// locus:gst-24
181653_at	1.29356	0.024994	T22H9.3	T22H9.3 /// WBGene00020707	hypothetical protein /// status:Partially_confirmed
183136_at	1.29242	0.46544	R05G6.9	R05G6.9 /// WBGene00019901	hypothetical protein /// status:Confirmed
172317_x_at	1.29205	0.13204	Y67A6A.1	WBGene00013449 /// Y67A6A.1	status:Confirmed /// hypothetical protein
190622_at	1.29201	0.13169	ZK666.8	WBGene00014048 /// ZK666.8	serine/threonine kinase /// hypothetical protein
181855_at	1.292	0.023759	F58A6.1	F58A6.1 /// WBGene00019022	hypothetical protein /// status:Confirmed
192501_at	1.29107	0.029097	F54C8.1	F54C8.1 /// WBGene00010035	hypothetical protein /// 3-hydroxyacyl-CoA dehydrogenase
172139_x_at	1.29082	0.15684	Y46H3D.1	WBGene00021608 /// Y46H3D.1	status:Partially_confirmed /// hypothetical protein
176097_at	1.29079	0.19068	ZK688.12 /// ZK688.7	WBGene00022802 /// WBGene00044763 /// ZK688.12 /// ZK688.7	status:Partially_confirmed /// status:Confirmed /// hypothetical protein /// hypothetical protein
190032_s_at	1.28988	0.18954	C17G1.6	nas-37	Nematode AStacin protease
182517_at	1.28929	0.19608	C18G1.9	C18G1.9 /// WBGene00015987	hypothetical protein /// status:Partially_confirmed
190671_at	1.28843	0.13794	C36B1.10	gska-3 /// WBGene00007977	Glycogen Synthase Kinase Alpha subunit /// locus:gska-3
191797_at	1.28821	0.18441	ZC449.2	WBGene00022612 /// ZC449.2	status:Confirmed /// hypothetical protein
187234_s_at	1.2881	0.006955	Y110A2AL.9	WBGene00022445 /// Y110A2AL.9	status:Confirmed /// hypothetical protein
189522_at	1.28809	0.079268	B0365.1	B0365.1 /// WBGene00007150	hypothetical protein /// ATP citrate lyase
185552_s_at	1.28777	0.31621	C16A11.8	clec-135 /// WBGene00015821	C-type LECtin /// locus:clec-135
183108_at	1.28739	0.043147	C12D5.9	C12D5.9 /// WBGene00015710	hypothetical protein /// status:Partially_confirmed
179587_at	1.28696	0.022406	F44F4.3	F44F4.3 /// WBGene00009702	hypothetical protein /// status:Partially_confirmed
181324_at	1.28683	0.21715	F52H2.4	F52H2.4 /// WBGene00018716	hypothetical protein /// status:Partially_confirmed
192195_at	1.28682	0.10937	F28F8.2	acs-2 /// WBGene00009221	fatty Acid CoA Synthetase family /// locus:acs-2
AFFX-Ce_catalase_5_s_at	1.2867	0.000799	---	---	---
180062_s_at	1.28662	0.093882	T22C1.11	T22C1.11 /// WBGene00011920	hypothetical protein /// status:Partially_confirmed
178963_at	1.28653	0.054555	F53B6.7	F53B6.7 /// WBGene00009962	hypothetical protein /// status:Partially_confirmed
184166_at	1.28602	0.028433	F43C9.1	F43C9.1 /// WBGene00018375	hypothetical protein /// status:Confirmed
183500_at	1.28586	0.088565	D2024.1	D2024.1 /// WBGene00017050	hypothetical protein /// status:Partially_confirmed
173147_s_at	1.28504	0.27924	C27C7.8 /// ZK1025.9	nhr-113 /// nhr-259 /// WBGene00003703 /// WBGene00007770	Nuclear Hormone Receptor family /// Nuclear Hormone Receptor family /// locus:nhr-113 /// locus:nhr-259
172241_x_at	1.2847	0.038242	C37A5.8	fipr-24 /// WBGene00007992	FIP (Fungus-Induced Protein) Related /// locus:fipr-24
185361_at	1.28457	0.070343	C17G10.7	C17G10.7 /// WBGene00015919	hypothetical protein /// status:Partially_confirmed
183932_at	1.28444	0.5	F38E1.6	F38E1.6 /// WBGene00018179	hypothetical protein /// status:Predicted
191896_at	1.28425	0.052663	H06I04.5	H06I04.5 /// WBGene00019169	hypothetical protein /// protein-tyrosine phoshatase
189802_s_at	1.28414	0.041254	R11F4.1	R11F4.1 /// WBGene00020007	hypothetical protein /// Glycerol kinase
191559_s_at	1.28401	0.10819	F11A5.9	F11A5.9 /// WBGene00008677	hypothetical protein /// sodium/phosphate transporter
188182_at	1.28382	0.013113	F54C1.9	sst-20 /// WBGene00006058	Sperm Specific Transcript /// locus:sst-20
172141_at	1.28362	0.022333	C03A3.t1 /// C14F11.t1 /// C18A11.t2 /// C28A5.t1 /// C28A5.t2 /// F08G5.t1 /// F09B9.t1 /// F09B9.t2 /// F12D9.t4 /// F12D9.t5 /// F13G11.t1 /// F33D11.t2 /// F42G10.t1 /// K01A12.t1 /// K01A12.t3 /// M57.t1 /// T01C1.t1 /// T06H11.t2 /// T06H11.t3	---	---
181711_at	1.28279	0.025049	ZK546.4	WBGene00022761 /// ZK546.4	status:Partially_confirmed /// hypothetical protein
174295_at	1.28275	0.23171	T22G5.5	sptl-3 /// WBGene00011932	Serine Palmitoyl Transferase famiLy /// locus:sptl-3
190101_s_at	1.28256	0.006287	R151.5	dpy-31	DumPY : shorter than wild-type
173148_s_at	1.28172	0.00724	R12H7.2	asp-4 /// WBGene00000217	ASpartyl Protease /// locus:asp-4
173494_s_at	1.28122	0.086209	T20F5.4	T20F5.4 /// WBGene00020626	hypothetical protein /// status:Confirmed
187529_s_at	1.28065	0.19362	ZK1307.3 /// ZK1307.4	WBGene00014246 /// WBGene00014247 /// ZK1307.3 /// ZK1307.4	status:Confirmed /// status:Confirmed /// hypothetical protein /// hypothetical protein
176547_at	1.28062	0.035511	Y71G12B.3	WBGene00022143 /// Y71G12B.3	status:Partially_confirmed /// hypothetical protein
181618_at	1.28044	0.084596	ZK418.2	ZK418.2	hypothetical protein
187216_s_at	1.28025	0.38618	D1044.2	D1044.2	hypothetical protein
193024_at	1.27967	0.078207	C15H9.1	nnt-1 /// WBGene00003778	Nicotinamide Nucleotide Transhydrogenase /// locus:nnt-1
181888_at	1.27912	0.096585	T05C1.3	T05C1.3 /// WBGene00020250	hypothetical protein /// status:Partially_confirmed
178108_at	1.2782	0.056502	T27E7.1	T27E7.1 /// WBGene00012087	hypothetical protein /// status:Confirmed
182929_s_at	1.27794	0.2938	ZK154.6	ZK154.6	hypothetical protein
183410_s_at	1.27763	0.042051	D2062.4 /// D2062.5	D2062.4 /// D2062.5 /// WBGene00017057	hypothetical protein /// hypothetical protein /// status:Partially_confirmed
177650_at	1.27746	0.14266	W04G3.8	lpr-3 /// WBGene00012261	LiPocalin-Related protein /// locus:lpr-3
188862_s_at	1.27741	0.074128	C56E6.5	abch-1 /// WBGene00016973	ABC transporter, class H /// locus:abch-1
176461_s_at	1.27717	0.075386	Y59H11AM.2 /// Y59H11AM.3	WBGene00022006 /// WBGene00022007 /// Y59H11AM.2 /// Y59H11AM.3	status:Partially_confirmed /// status:Predicted /// hypothetical protein /// hypothetical protein
187972_at	1.27717	0.084861	C03C11.2	fog-3 /// WBGene00001483	Feminization Of Germline /// locus:fog-3
184984_s_at	1.27709	0.03831	K08D9.4 /// Y73C8B.1	K08D9.4 /// WBGene00019525 /// WBGene00022258 /// Y73C8B.1	hypothetical protein /// status:Partially_confirmed /// status:Partially_confirmed /// hypothetical protein
187309_at	1.27673	0.090108	ZK1128.3	WBGene00014229 /// ZK1128.3	status:Partially_confirmed /// hypothetical protein
192931_at	1.27663	0.049827	C01G12.8	C01G12.8 /// WBGene00007248	hypothetical protein /// locus:catp-4
193221_s_at	1.27637	0.066033	C16C2.3	ocrl-1	OCRL (Lowe's oculocerebrorenal syndrome protein) homolog
182906_at	1.276	0.03846	F29B9.7	F29B9.7 /// WBGene00017922	hypothetical protein /// status:Confirmed
180678_at	1.27589	0.4	F08G12.8	F08G12.8 /// WBGene00008589	hypothetical protein /// status:Confirmed
183930_at	1.27564	0.082835	C17C3.9	C17C3.9 /// WBGene00015892	hypothetical protein /// status:Confirmed
181243_at	1.27551	0.015251	C38C3.3	C38C3.3 /// WBGene00016512	hypothetical protein /// status:Partially_confirmed
184302_s_at	1.27532	0.1227	Y73F8A.12 /// Y73F8A.14	WBGene00013521 /// WBGene00013523 /// Y73F8A.12 /// Y73F8A.14	status:Partially_confirmed /// status:Partially_confirmed /// hypothetical protein /// hypothetical protein
194058_s_at	1.2752	0.0364	C12D8.10	akt-1	AKT kinase family
176696_at	1.27483	0.27989	Y66A7A.2	WBGene00013422 /// Y66A7A.2	status:Partially_confirmed /// hypothetical protein
179498_at	1.27478	0.10906	C06H5.2	fbxa-157 /// WBGene00007393	F-box A protein /// locus:fbxa-157
185193_at	1.27446	0.10297	Y50E8A.12	WBGene00013055 /// Y50E8A.12	status:Partially_confirmed /// hypothetical protein
184344_s_at	1.27411	0.079931	Y57G7A.6	WBGene00021969 /// Y57G7A.6	status:Partially_confirmed /// hypothetical protein
180954_at	1.27382	0.049206	C45G7.5	cdh-10 /// WBGene00000402	CaDHerin family /// locus:cdh-10
190358_at	1.27358	0.065393	R04B5.5	R04B5.5 /// WBGene00011003	hypothetical protein /// sorbitol dehydrogenase
177715_s_at	1.27334	0.21869	ZC13.3	WBGene00022504 /// ZC13.3	status:Partially_confirmed /// hypothetical protein
175328_at	1.2733	0.37862	F59D12.1	F59D12.1 /// WBGene00010329	hypothetical protein /// G-protein coupled receptor (gastrin/cholecystokinin)
174796_at	1.27306	0.090367	F32H2.5	fasn-1 /// WBGene00009342	Fatty Acid SyNthase /// locus:fasn-1
178523_at	1.2729	0.001738	M02B1.4	M02B1.4 /// WBGene00010829	hypothetical protein /// status:Partially_confirmed
192920_s_at	1.27265	0.25974	F54D1.4	nhr-7 /// WBGene00003606	Nuclear Hormone Receptor family /// locus:nhr-7
180594_at	1.2726	0.026635	F54C1.8	F54C1.8 /// WBGene00018792	hypothetical protein /// status:Partially_confirmed
189037_at	1.27248	0.019552	T21E8.3	pgp-8 /// WBGene00004002	P-GlycoProtein related /// locus:pgp-8
172030_x_at	1.27238	0.056257	Y47H9C.6	csp-3 /// WBGene00000821	CaSPase /// locus:csp-3
188663_at	1.27185	0.043168	F19H6.2	glb-13 /// WBGene00008957	GLoBin /// locus:glb-13
191867_at	1.27147	0.037193	T05C12.3	T05C12.3 /// WBGene00011467	hypothetical protein /// 2,4-dienoyl-CoA reductase
190100_at	1.2713	0.020415	R151.5	dpy-31	DumPY : shorter than wild-type
182441_s_at	1.27102	0.066564	H12D21.2 /// ZC412.9	H12D21.2 /// WBGene00010378 /// WBGene00013890 /// ZC412.9	hypothetical protein /// status:Predicted /// status:Predicted /// hypothetical protein
172289_x_at	1.27008	0.083659	W03D8.3	W03D8.3 /// WBGene00020986	hypothetical protein /// status:Partially_confirmed
172144_x_at	1.26971	0.009524	F14H12.4	cst-1	Caenorhabditis STE20-like kinase
181151_at	1.26948	0.097976	C26B9.2	C26B9.2 /// WBGene00016132	hypothetical protein /// status:Partially_confirmed
176188_at	1.26944	0.14437	Y71D11A.1	cdh-12 /// WBGene00022103	CaDHerin family /// locus:cdh-12
188370_s_at	1.26941	0.49655	C08B6.4	chitinase	hypothetical protein
187142_at	1.26936	0.01561	ZK637.12	WBGene00014029 /// ZK637.12	status:Partially_confirmed /// hypothetical protein
191306_s_at	1.26921	0.004079	B0395.3	B0395.3 /// WBGene00007175	hypothetical protein /// choline O-acetyltransferase
183742_at	1.26891	0.009456	F40H6.1	F40H6.1 /// WBGene00018253	hypothetical protein /// status:Confirmed
189209_at	1.26869	0.077211	B0218.5	B0218.5 /// WBGene00015049	hypothetical protein /// ser/thr kinase
191627_at	1.26867	0.002442	F44D12.1	F44D12.1 /// WBGene00009678	hypothetical protein /// Tight junction protein like
186716_at	1.26835	0.03153	ZK637.4	WBGene00014024 /// ZK637.4	status:Confirmed /// hypothetical protein
174610_at	1.26784	0.065901	F39C12.3	tsp-14	TetraSPanin family
189185_at	1.26768	0.14394	C05E4.14	srh-2	Serpentine Receptor, class H
182764_at	1.26749	0.015415	Y54E2A.9	WBGene00013194 /// Y54E2A.9	status:Confirmed /// hypothetical protein
191296_at	1.2673	0.04434	C33A12.15	ttr-9 /// WBGene00007888	TransThyretin-Related family domain /// locus:ttr-9
177006_s_at	1.26724	0.005331	Y54G2A.29	WBGene00021893 /// Y54G2A.29	status:Partially_confirmed /// hypothetical protein
181193_at	1.26687	0.038407	T21H3.4	cutl-22 /// WBGene00020663	CUTiclin-Like /// locus:cutl-22
183407_at	1.26651	0.29877	F40H3.3	F40H3.3 /// WBGene00018251	hypothetical protein /// status:Partially_confirmed
173472_s_at	1.26644	0.000483	Y57A10C.6	WBGene00013284 /// Y57A10C.6	locus:daf-22 /// hypothetical protein
189949_at	1.26638	0.032725	T20D3.7	vps-26	related to yeast Vacuolar Protein Sorting factor
192502_at	1.26587	0.064896	F09F3.9	cpt-5 /// WBGene00008629	Carnitine Palmitoyl Transferase /// locus:cpt-5
189044_s_at	1.2649	0.033066	T05A7.6	T05A7.6 /// WBGene00020223	hypothetical protein /// casein kinase
191530_at	1.26484	0.022755	ZK849.5	WBGene00014103 /// ZK849.5	Putative membrane protein /// hypothetical protein
179391_at	1.26476	0.08374	ZK265.3	WBGene00013956 /// ZK265.3	status:Confirmed /// hypothetical protein
187477_s_at	1.26402	0.24596	F19F10.11	F19F10.11	hypothetical protein
177410_at	1.26359	0.068872	C01A2.2	C01A2.2	hypothetical protein
190178_s_at	1.2634	0.041612	F14D12.5	sulp-2 /// WBGene00017464	SULfate Permease family /// locus:sulp-2
188043_at	1.26337	0.035174	F44B9.1	dpf-6	Dipeptidyl Peptidase Four (IV) family
173006_s_at	1.26227	0.13255	F42C5.9	F42C5.9 /// WBGene00018349	hypothetical protein /// status:Confirmed
174947_s_at	1.26175	0.069404	W03F11.3	dct-9 /// WBGene00021006	DAF-16/FOXO Controlled, germline Tumor affecting /// locus:dct-9
192242_at	1.26083	0.002361	F32H2.6	F32H2.6 /// WBGene00009343	hypothetical protein /// fatty acid synthase (N-terminus)
193830_at	1.26059	0.035248	W08D2.8	kin-21 /// WBGene00002204	protein KINase /// locus:kin-21
174509_s_at	1.26049	0.022892	Y17G7B.10	Y17G7B.10	hypothetical protein
187086_at	1.26008	0.065579	Y57G11C.31	WBGene00013321 /// Y57G11C.31	status:Confirmed /// hypothetical protein
184531_s_at	1.25984	0.24724	W10G11.1	W10G11.1 /// WBGene00021134	hypothetical protein /// status:Partially_confirmed
192199_at	1.25973	0.070702	F11E6.8	F11E6.8	hypothetical protein
188400_s_at	1.25952	0.066245	C34F6.2 /// C34F6.3	col-178 /// col-179 /// WBGene00000751 /// WBGene00000752	COLlagen /// COLlagen /// locus:col-178 /// locus:col-179
189384_s_at	1.25919	0.03514	Y73B6A.1	WBGene00022228 /// Y73B6A.1	protein kinase /// hypothetical protein
178803_at	1.25908	0.034247	K06B4.15	K06B4.15 /// WBGene00077450	hypothetical protein /// status:Confirmed
172201_x_at	1.2587	0.032768	ZC376.8	WBGene00013879 /// ZC376.8	status:Confirmed /// hypothetical protein
193022_s_at	1.25863	0.020336	Y45F10B.8 /// Y45F10B.9	WBGene00012872 /// WBGene00012873 /// Y45F10B.8 /// Y45F10B.9	Zinc finger, C3HC4 type (RING finger) /// Zinc finger, C3HC4 type (RING finger) /// hypothetical protein /// hypothetical protein
175948_s_at	1.25849	0.033247	D2007.5	atg-13 /// WBGene00017045	AuTophaGy (yeast Atg homolog) /// locus:atg-13
192107_s_at	1.25757	0.014493	D2023.2	pyc-1 /// WBGene00004258	PYruvate Carboxylase /// locus:pyc-1
175616_at	1.25749	0.17518	F54E7.3	par-3	abnormal embryonic PARtitioning of cytoplasm
177515_at	1.25714	0.13578	K04G2.7	K04G2.7	hypothetical protein
186029_at	1.25698	0.057641	T28C12.3	fbxa-202 /// WBGene00020890	F-box A protein /// locus:fbxa-202
193746_s_at	1.25594	0.19587	F44F4.6 /// F44F4.7	beta-1,6-N-acetylglucosaminyltransferase /// WBGene00001626	hypothetical protein /// locus:gly-1
177351_at	1.25556	0.16192	R102.3	R102.3 /// WBGene00011290	hypothetical protein /// status:Partially_confirmed
183657_at	1.25553	0.020464	F26F4.8	F26F4.8 /// WBGene00005011	hypothetical protein /// status:Confirmed
187143_s_at	1.25516	0.098844	ZK637.12 /// ZK637.15	WBGene00014029 /// WBGene00014032 /// ZK637.12 /// ZK637.15	status:Partially_confirmed /// status:Predicted /// hypothetical protein /// hypothetical protein
180357_at	1.25502	0.001245	B0034.5	B0034.5 /// WBGene00015005	hypothetical protein /// status:Partially_confirmed
181737_at	1.25486	0.079173	F41G3.4	fis-1 /// WBGene00001424	S. cerevisiae FIS1-related /// locus:fis-1
177505_at	1.2546	0.3621	T06G6.6	T06G6.6	hypothetical protein
177906_s_at	1.25416	0.07338	F14F7.4	F14F7.4 /// WBGene00008811	hypothetical protein /// status:Partially_confirmed
176853_at	1.25415	0.013906	Y40B10A.5	WBGene00021490 /// Y40B10A.5	status:Partially_confirmed /// hypothetical protein
182930_at	1.254	0.011512	W03D2.1	pqn-75	Prion-like-(Q/N-rich)-domain-bearing protein
183648_s_at	1.25373	0.009184	K08F8.5	K08F8.5	hypothetical protein
174023_at	1.25336	0.11965	ZC410.1	nhr-11	Nuclear Hormone Receptor family
184031_at	1.25336	0.080298	F36A4.2	F36A4.2 /// WBGene00018081	hypothetical protein /// status:Confirmed
177706_at	1.25322	0.023965	F58D5.7	F58D5.7 /// WBGene00010246	hypothetical protein /// status:Confirmed
190834_at	1.25314	0.1827	C05E11.4	amt-1 /// WBGene00000133	AMmonium Transporter homolog /// locus:amt-1
189194_at	1.25312	0.04564	F27E5.3	F27E5.3 /// WBGene00009193	hypothetical protein /// homeobox domain
183344_at	1.25289	0.38076	R09B5.5	pqn-54 /// WBGene00004139	Prion-like-(Q/N-rich)-domain-bearing protein /// locus:pqn-54
179510_at	1.25285	0.30387	F58H1.2	F58H1.2 /// WBGene00010285	hypothetical protein /// status:Partially_confirmed
176200_at	1.25277	0.08284	Y69A2AR.9	WBGene00022080 /// Y69A2AR.9	status:Partially_confirmed /// hypothetical protein
171743_x_at	1.25219	0.065901	K03B4.7	cpg-8	Chondroitin ProteoGlycan
187203_at	1.25219	0.019561	C06G4.4	C06G4.4 /// WBGene00015558	hypothetical protein /// status:Confirmed
182200_at	1.25206	0.057975	C05C12.5	C05C12.5 /// WBGene00007337	hypothetical protein /// status:Confirmed
187367_at	1.25201	0.040416	ZK1098.9	WBGene00014225 /// ZK1098.9	status:Partially_confirmed /// hypothetical protein
193353_s_at	1.25182	0.31629	F26D2.10	F26D2.10 /// WBGene00009149	hypothetical protein /// Ank repeat, BRCA1 C Terminus (BRCT) domain
192174_at	1.25152	0.003367	F43G9.6	fer-1	FERtilization defective (abnormal sperm)
191197_s_at	1.25095	0.1107	Y44A6D.5	WBGene00012855 /// Y44A6D.5	Aminotransferase class IV /// hypothetical protein
175972_at	1.25093	0.19708	E01A2.1	E01A2.1	hypothetical protein
180345_s_at	1.25093	0.00724	K07H8.9	K07H8.9 /// WBGene00019509	hypothetical protein /// status:Confirmed
175560_at	1.25091	0.000519	---	F59E11.7	Hypothetical protein (F59E11.7)
194187_x_at	1.25056	0.15003	W01F3.3	mlt-11	MoLTing defective
185185_at	1.25051	0.15919	F59E11.7	F59E11.7	hypothetical protein
172220_x_at	1.25039	0.13349	C37A5.2 /// C37A5.4	fipr-23 /// WBGene00007989 /// WBGene00007990	FIP (Fungus-Induced Protein) Related /// locus:fipr-22 /// locus:fipr-23
178992_at	1.25029	0.29281	ZC116.5	---	---
176407_at	1.25023	0.022206	F28A10.1	F28A10.1 /// WBGene00017869	hypothetical protein /// status:Partially_confirmed
177495_at	1.24995	0.18872	C01F6.2	C01F6.2 /// WBGene00007222	hypothetical protein /// status:Confirmed
183780_at	1.24981	0.010668	F01G10.5	F01G10.5 /// WBGene00008508	hypothetical protein /// status:Partially_confirmed
190399_at	1.24933	0.16882	Y40C5A.2	ocr-4 /// WBGene00003841	Osm-9 and Capsaicin receptor-Related /// locus:ocr-4
178674_at	1.24926	0.1219	Y6B3B.9	WBGene00012393 /// Y6B3B.9	status:Confirmed /// hypothetical protein
187572_at	1.24925	0.04929	ZK353.4	WBGene00022700 /// ZK353.4	status:Partially_confirmed /// hypothetical protein
186876_at	1.24922	0.083025	C14A4.3	C14A4.3 /// WBGene00007556	hypothetical protein /// status:Partially_confirmed
178316_at	1.24917	0.032772	C29F7.2	C29F7.2 /// WBGene00007811	hypothetical protein /// status:Confirmed
191908_s_at	1.24913	0.039514	F20H11.4	F20H11.4 /// WBGene00017647	hypothetical protein /// protein-tyrosine phosphatase
193545_s_at	1.24908	0.020101	F57B7.4	mig-17 /// WBGene00003248	abnormal cell MIGration /// locus:mig-17
176687_at	1.24837	0.10817	C45B2.3	C45B2.3 /// WBGene00016660	hypothetical protein /// status:Partially_confirmed
178120_s_at	1.24772	0.070468	C13C4.4	C13C4.4 /// WBGene00007548	hypothetical protein /// status:Confirmed
188234_s_at	1.24721	0.15383	Y46G5A.30	snf-5 /// WBGene00004904	Sodium:Neurotransmitter symporter Family /// locus:snf-5
184624_s_at	1.24705	0.12326	C25H3.10	C25H3.10	hypothetical protein
182857_at	1.24702	0.14107	W03B1.8	oac-52 /// WBGene00020977	O-ACyltransferase homolog /// locus:oac-52
192279_at	1.24694	0.21454	T24D8.1	lgc-40 /// WBGene00020767	Ligand-Gated ion Channel /// locus:lgc-40
193885_at	1.24657	0.23861	B0393.5	B0393.5 /// WBGene00007170	hypothetical protein /// EGF-like aspartic acid and asparagine hydroxylation sites
186752_s_at	1.24631	0.099148	Y32H12A.4	WBGene00021312 /// Y32H12A.4	status:Confirmed /// hypothetical protein
190150_at	1.24608	0.33787	C27A12.3	tag-146 /// WBGene00006492	Temporarily Assigned Gene name /// locus:tag-146
189261_at	1.24605	0.39774	F21A3.2	F21A3.2	hypothetical protein
180433_at	1.24605	0.036414	K07F5.12	K07F5.12 /// WBGene00010637	hypothetical protein /// status:Partially_confirmed
189394_at	1.24604	0.096502	K07C6.5	cyp-35A5 /// WBGene00019473	CYtochrome P450 family /// locus:cyp-35A5
190039_at	1.246	0.4411	C29G2.5	srt-58 /// WBGene00016233	Serpentine Receptor, class T /// locus:srt-58
180895_at	1.24571	0.15797	K10G6.2	dos-2 /// WBGene00019640	Delta and OSM-11-like /// locus:dos-2
183826_at	1.2457	0.088967	F01G10.9	F01G10.9 /// WBGene00008511	hypothetical protein /// status:Partially_confirmed
186959_at	1.24539	0.29436	T07A5.1	T07A5.1 /// WBGene00011554	hypothetical protein /// status:Partially_confirmed
174540_s_at	1.24532	0.040289	F47B3.2 /// F47B3.7	F47B3.2 /// F47B3.7 /// WBGene00018526 /// WBGene00018531	hypothetical protein /// hypothetical protein /// status:Partially_confirmed /// status:Partially_confirmed
188525_at	1.2439	0.044475	F42G9.2	cyn-6 /// WBGene00000882	CYclophyliN /// locus:cyn-6
194223_x_at	1.24366	0.00557	C03G5.12 /// C03G5.13 /// C03G5.9	nspc-2 /// nspc-5 /// nspc-6 /// WBGene00044337 /// WBGene00044340 /// WBGene00044357	Nematode Specific Peptide family, group C /// Nematode Specific Peptide family, group C /// Nematode Specific Peptide family, group C /// locus:nspc-2 /// locus:nspc-5 /// locus:nspc-6
189926_at	1.24361	0.012687	T07D10.3	T07D10.3 /// WBGene00011583	hypothetical protein /// zinc finger protein
191764_at	1.24345	0.058421	C33H5.16	C33H5.16 /// WBGene00016382	hypothetical protein /// protein-tyrosine phophatase
189597_s_at	1.24337	0.051121	F59F4.1	F59F4.1 /// WBGene00010336	hypothetical protein /// acyl-CoA oxidase I
177098_at	1.24333	0.16839	---	---	---
185329_s_at	1.24333	0.22693	T05A12.3	T05A12.3 /// WBGene00020234	hypothetical protein /// status:Confirmed
190254_at	1.24312	0.039231	C55A6.5	sdz-8 /// WBGene00008334	SKN-1 Dependent Zygotic transcript /// locus:sdz-8
174393_at	1.2431	0.066993	H40L08.2	---	---
183234_s_at	1.24299	0.27808	ZC449.2	WBGene00022612 /// ZC449.2	status:Confirmed /// hypothetical protein
184562_at	1.24219	6.8e-05	C18A11.2	C18A11.2 /// WBGene00015948	hypothetical protein /// status:Partially_confirmed
191418_at	1.24172	0.14891	ZC443.6	ugt-16 /// WBGene00013901	UDP-GlucuronosylTransferase /// locus:ugt-16
183154_at	1.24153	0.039097	Y12A6A.1	WBGene00012439 /// Y12A6A.1	status:Confirmed /// hypothetical protein
182923_at	1.24152	0.20228	F56D2.3	F56D2.3 /// WBGene00018965	hypothetical protein /// status:Partially_confirmed
192253_s_at	1.24148	0.22493	R09E10.3	R09E10.3 /// WBGene00011173	hypothetical protein /// locus:acs-18
190737_at	1.24143	0.11461	F09C12.8	F09C12.8 /// WBGene00017279	hypothetical protein /// status:Confirmed
193518_s_at	1.24139	0.15747	R11G10.1	avr-15	altered AVeRmectin sensitivity
184555_at	1.24082	0.076068	T20D4.12	T20D4.12 /// WBGene00020618	hypothetical protein /// status:Predicted
179822_at	1.24054	0.39258	W04E12.5	W04E12.5 /// WBGene00012250	hypothetical protein /// status:Partially_confirmed
179758_at	1.23988	0.043029	K02D7.5	K02D7.5 /// WBGene00019300	hypothetical protein /// status:Confirmed
193579_at	1.23988	0.064475	Y43C5B.2	WBGene00012785 /// Y43C5B.2	Src homology domain 2, tyrosine-protein kinase /// hypothetical protein
181317_at	1.23938	0.14548	C17F4.2	C17F4.2 /// WBGene00015910	hypothetical protein /// status:Partially_confirmed
177528_at	1.2391	0.12378	F15D3.6	F15D3.6 /// WBGene00008856	hypothetical protein /// status:Confirmed
180855_s_at	1.23885	0.07736	C52B9.7	paf-2	PAF-acetylhydrolase
190013_at	1.23861	0.11147	T21D12.2	dpy-9 /// WBGene00001071	DumPY : shorter than wild-type /// locus:dpy-9
172411_x_at	1.23828	0.3809	T24A6.1	T24A6.1 /// WBGene00020744	hypothetical protein /// status:Predicted
184837_at	1.23741	0.059216	Y113G7B.4	ftr-1 /// WBGene00013756	Fog Two (fog-2) Related /// locus:ftr-1
179788_s_at	1.2373	0.056708	T22B3.2	T22B3.2	hypothetical protein
172482_x_at	1.2373	0.025404	Y53F4A.2	WBGene00013148 /// Y53F4A.2	status:Partially_confirmed /// hypothetical protein
184811_at	1.23684	0.11092	T27A10.6	T27A10.6 /// WBGene00020846	hypothetical protein /// status:Confirmed
180393_at	1.23671	0.046958	C09H10.9	C09H10.9 /// WBGene00007503	hypothetical protein /// status:Partially_confirmed
174849_at	1.23664	0.24148	F58G11.2	F58G11.2 /// WBGene00010280	hypothetical protein /// ATP-dependent RNA helicase like
184019_at	1.2365	0.071831	C01F1.3	C01F1.3	hypothetical protein
193656_s_at	1.23623	0.18377	C50F2.6	fkb-5	FK506-Binding protein family
193319_at	1.2361	0.22022	C44H4.2	sym-5 /// WBGene00006370	SYnthetic lethal with Mec /// locus:sym-5
182843_at	1.23596	0.034596	Y44A6C.1	WBGene00012850 /// Y44A6C.1	status:Partially_confirmed /// hypothetical protein
175484_s_at	1.23589	0.20652	C28G1.3	sec-15 /// WBGene00016188	yeast SEC homolog /// locus:sec-15
176419_at	1.23572	0.082306	Y71G12B.27	WBGene00022162 /// Y71G12B.27	status:Partially_confirmed /// hypothetical protein
182078_at	1.23566	0.049526	T10E9.8	T10E9.8 /// WBGene00020418	hypothetical protein /// status:Partially_confirmed
194119_at	1.23559	0.056836	H13N06.4	H13N06.4	hypothetical protein
193364_at	1.23552	0.31936	F54E4.2	F54E4.2 /// WBGene00010058	hypothetical protein /// 7 transmembrane receptor (rhodopsin family)
186521_at	1.23529	0.14701	F21C10.10	F21C10.10 /// WBGene00017659	hypothetical protein /// status:Confirmed
189149_at	1.23506	0.015861	F26A1.3	F26A1.3 /// WBGene00017802	hypothetical protein /// Protein kinase
184928_at	1.23506	0.10261	C32B5.14	fbxc-18 /// WBGene00016307	F-box C protein /// locus:fbxc-18
187274_at	1.23423	0.026659	C03C10.4	C03C10.4 /// WBGene00007270	hypothetical protein /// status:Confirmed
194086_at	1.23422	0.13763	W01F3.3	mlt-11	MoLTing defective
181844_at	1.2336	0.2777	Y45F3A.4	WBGene00012861 /// Y45F3A.4	status:Confirmed /// hypothetical protein
178526_at	1.23327	0.048573	T24F1.4	T24F1.4 /// WBGene00011996	hypothetical protein /// status:Predicted
172824_x_at	1.23321	0.044248	T10C6.11	his-4 /// WBGene00001878	HIStone /// locus:his-4
186943_at	1.23269	0.011688	Y113G7B.24	WBGene00013768 /// Y113G7B.24	status:Partially_confirmed /// hypothetical protein
191120_at	1.23266	0.019281	F55A11.11	F55A11.11 /// WBGene00010082	hypothetical protein /// status:Confirmed
175384_at	1.2319	0.18412	R03C1.3	cog-1	Connection Of Gonad defective
184714_s_at	1.23183	0.13072	Y53G8B.2	WBGene00021818 /// Y53G8B.2	status:Confirmed /// hypothetical protein
191229_at	1.23139	0.10157	F48G7.11	nhr-190 /// WBGene00018622	Nuclear Hormone Receptor family /// locus:nhr-190
190682_at	1.23136	0.11369	F10D2.2	ugt-39	UDP-GlucuronosylTransferase
180973_at	1.23128	0.10784	F49F1.6	F49F1.6 /// WBGene00018646	hypothetical protein /// status:Confirmed
179668_at	1.23115	0.12926	T04B2.7	T04B2.7 /// WBGene00011425	hypothetical protein /// status:Partially_confirmed
179247_at	1.23096	0.38104	F23A7.5	F23A7.5 /// WBGene00009070	hypothetical protein /// status:Partially_confirmed
176158_at	1.23032	0.016618	F09G8.2	tag-198 /// WBGene00007056	Temporarily Assigned Gene name /// locus:crn-7
178513_at	1.23031	0.041961	C38D4.7	C38D4.7 /// WBGene00008007	hypothetical protein /// status:Confirmed
173529_at	1.2297	0.12355	C36A4.4	C36A4.4 /// WBGene00007965	hypothetical protein /// status:Confirmed
189723_s_at	1.22939	0.16474	EGAP7.1	dpy-3 /// WBGene00001065	DumPY : shorter than wild-type /// locus:dpy-3
174107_at	1.22932	0.44495	C53D5.1	C53D5.1	hypothetical protein
180485_s_at	1.22872	0.052655	C45B2.7	ptr-4 /// WBGene00004219	PaTched Related family /// locus:ptr-4
185220_s_at	1.22871	0.15622	D2096.11 /// M116.5	D2096.11 /// M116.5 /// WBGene00017078 /// WBGene00019792	hypothetical protein /// hypothetical protein /// status:Partially_confirmed /// status:Partially_confirmed
176860_at	1.22835	0.15735	F36D3.1	F36D3.1 /// WBGene00009469	hypothetical protein /// status:Confirmed
189818_at	1.22825	0.060241	K08F8.1	K08F8.1	hypothetical protein
177227_at	1.22816	0.068862	M88.3	M88.3 /// WBGene00010906	hypothetical protein /// status:Partially_confirmed
192704_at	1.22809	0.015712	C05D2.3	C05D2.3 /// WBGene00015467	hypothetical protein /// aromatic-L-amino-acid decarboxylase
173775_at	1.22808	0.085291	D1037.4	rab-8 /// WBGene00004272	RAB family /// locus:rab-8
187400_s_at	1.22803	0.16765	F32A5.7	lsm-4 /// WBGene00003078	LSM Sm-like protein /// locus:lsm-4
182361_s_at	1.22801	0.001606	C05D9.7	C05D9.7 /// WBGene00015474	hypothetical protein /// status:Confirmed
182253_at	1.22781	0.1808	Y80D3A.5	cyp-42A1 /// WBGene00013585	CYtochrome P450 family /// locus:cyp-42A1
181993_at	1.22777	0.097288	T10E9.6	T10E9.6 /// WBGene00020416	hypothetical protein /// status:Partially_confirmed
190745_at	1.22772	0.028457	C05C12.1	C05C12.1 /// WBGene00007335	hypothetical protein /// serine/threonine kinase
174438_at	1.22769	0.027899	ZK593.6	lgg-2 /// WBGene00002981	LC3, GABARAP and GATE-16 family /// locus:lgg-2
190814_s_at	1.22735	0.10387	C50F4.10	C50F4.10 /// WBGene00008235	hypothetical protein /// serine/threonine kinase
188112_at	1.22714	0.10473	F49E2.4	glb-17 /// WBGene00009887	GLoBin /// locus:glb-17
191943_at	1.2261	0.10005	C14C10.1	C14C10.1 /// WBGene00007584	hypothetical protein /// mitochondrial carrier protein
178685_at	1.22604	0.001072	D2085.7	D2085.7 /// WBGene00008432	hypothetical protein /// status:Confirmed
174830_at	1.22571	0.076486	T03G11.1	pqn-62 /// WBGene00004145	Prion-like-(Q/N-rich)-domain-bearing protein /// locus:pqn-62
184800_at	1.22557	0.21001	K12D9.14	K12D9.14 /// WBGene00077758	hypothetical protein /// status:Predicted
181630_at	1.22546	0.064728	Y37D8A.5	WBGene00012547 /// Y37D8A.5	status:Partially_confirmed /// hypothetical protein
186662_at	1.22544	0.057301	Y105C5B.17	WBGene00013656 /// Y105C5B.17	status:Partially_confirmed /// hypothetical protein
192715_s_at	1.22528	0.007435	T25B9.2 /// Y69E1A.4	T25B9.2 /// WBGene00012008 /// WBGene00013476 /// Y69E1A.4	hypothetical protein /// serine/threonine protein phosphatase /// Ser/Thr protein phosphatase /// hypothetical protein
185599_s_at	1.22515	0.026971	F02C12.5	cyp-13B1	CYtochrome P450 family
184341_at	1.22502	0.064156	C35D10.8	C35D10.8 /// WBGene00016445	hypothetical protein /// status:Partially_confirmed
192851_s_at	1.22469	0.060771	F29F11.6	gsp-1 /// WBGene00001747	yeast Glc Seven-like Phosphatases /// locus:gsp-1
184917_at	1.22454	0.24524	T20D4.17	T20D4.17 /// WBGene00020622	hypothetical protein /// status:Partially_confirmed
194203_x_at	1.22414	0.14538	W04G3.8	lpr-3 /// WBGene00012261	LiPocalin-Related protein /// locus:lpr-3
189564_s_at	1.2241	0.025899	B0238.1	carboxylesterase /// WBGene00015067	hypothetical protein /// carboxylesterase
175111_at	1.22393	0.19193	C07H6.9	C07H6.9 /// WBGene00015582	hypothetical protein /// status:Confirmed
177434_at	1.22392	0.00819	F35E2.3	---	---
176740_at	1.22386	0.059259	M04F3.2 /// Y80D3A.11	M04F3.2 /// WBGene00019768	hypothetical protein /// status:Partially_confirmed
183036_at	1.22383	0.10784	F32B5.6	F32B5.6	hypothetical protein
177424_at	1.22358	0.010071	T01E8.1	T01E8.1 /// WBGene00011331	hypothetical protein /// status:Partially_confirmed
194035_s_at	1.22353	0.018037	T03G6.2	nhr-40	Nuclear Hormone Receptor family
183810_at	1.22344	0.093783	R05A10.8	R05A10.8 /// WBGene00011025	hypothetical protein /// status:Predicted
185835_at	1.22293	0.1437	K08B12.1	K08B12.1 /// WBGene00019520	hypothetical protein /// status:Confirmed
175449_s_at	1.2223	0.13635	Y38E10A.14	WBGene00012592 /// Y38E10A.14	status:Confirmed /// hypothetical protein
193007_s_at	1.22213	0.005259	K08E7.9	pgp-1 /// WBGene00003995	P-GlycoProtein related /// locus:pgp-1
191783_at	1.22194	0.025722	F53C11.3	F53C11.3 /// WBGene00009973	hypothetical protein /// 2,4-dienoyl-CoA reductase
181641_at	1.22158	0.037565	C29F5.7	glb-10 /// WBGene00016215	GLoBin /// locus:glb-10
182489_at	1.22103	0.051889	F53B3.2	F53B3.2 /// WBGene00018741	hypothetical protein /// status:Partially_confirmed
179010_at	1.22084	0.052375	ZK795.2	WBGene00014082 /// ZK795.2	status:Confirmed /// hypothetical protein
175666_s_at	1.22058	0.21961	K04F10.4	bli-4	BLIstered cuticle
185961_at	1.22053	0.054565	Y64G10A.2	WBGene00013412 /// Y64G10A.2	status:Partially_confirmed /// hypothetical protein
173820_s_at	1.22046	0.004334	K07C5.5	ceeh-2 /// WBGene00010628	Caenorhabditis EpoxidE Hydrolase /// locus:ceeh-2
189719_at	1.22017	0.008042	W03C9.3	rab-7 /// WBGene00004271	RAB family /// locus:rab-7
181136_s_at	1.22012	0.088358	F52B11.3	noah-2 /// WBGene00009926	NOmpA Homolog (Drosophila nompA: no mechanoreceptor potential A) /// locus:noah-2
175217_at	1.21991	0.003881	K10D2.2	pup-2 /// WBGene00019628	Poly(U) Polymerase /// locus:pup-2
183608_at	1.21878	0.12065	F44A2.3	F44A2.3 /// WBGene00018403	hypothetical protein /// status:Partially_confirmed
185803_at	1.21867	0.07477	C28C12.4	C28C12.4 /// WBGene00016180	hypothetical protein /// status:Confirmed
185354_at	1.21865	0.10779	Y106G6G.3	dlc-6 /// WBGene00013712	Dynein Light Chain /// locus:dlc-6
193012_at	1.21861	0.016239	C27B7.6	C27B7.6 /// WBGene00007763	hypothetical protein /// serine/threonine protein phosphatase
190459_at	1.21847	0.067592	ZK1128.5	tag-246 /// WBGene00044072	Temporarily Assigned Gene name /// locus:tag-246
191647_at	1.21813	0.096747	C31B8.13	srh-247 /// WBGene00005453	Serpentine Receptor, class H /// locus:srh-247
180651_at	1.2181	0.081379	C03A7.6	srx-39 /// WBGene00005930	Serpentine Receptor, class X /// locus:srx-39
177869_at	1.21801	0.044349	T11G6.7	T11G6.7 /// WBGene00011721	hypothetical protein /// status:Partially_confirmed
172628_x_at	1.21798	0.23266	Y38E10A.16	WBGene00012594 /// Y38E10A.16	locus:nspe-5 /// hypothetical protein
186605_s_at	1.21783	0.001199	Y17G7B.10	Y17G7B.10	hypothetical protein
175006_at	1.21779	0.10988	C26D10.5	eff-1	Epithelial Fusion Failure
193370_s_at	1.21771	0.11467	F39H11.2	tlf-1	TBP-Like Factor
191291_at	1.21742	0.00838	C03C10.2	C03C10.2 /// WBGene00007269	hypothetical protein /// serine/threonine kinase
190979_at	1.21725	0.099777	F37B1.2	gst-12 /// WBGene00001760	Glutathione S-Transferase /// locus:gst-12
180761_at	1.21708	0.00817	F42A9.3	F42A9.3 /// WBGene00018332	hypothetical protein /// status:Confirmed
193248_at	1.21699	0.26095	F29F11.4	twk-12 /// WBGene00006667	TWiK family of potassium channels /// locus:twk-12
191606_at	1.21635	0.47176	C01F6.6	tag-60	Temporarily Assigned Gene name
174699_at	1.21631	0.071232	---	---	---
186122_at	1.21613	0.5	R06B10.2	R06B10.2 /// WBGene00019913	hypothetical protein /// status:Partially_confirmed
191899_at	1.21591	0.00838	M04G7.2	M04G7.2 /// WBGene00019773	hypothetical protein /// protein-tyrosine phosphatase
179164_at	1.21591	0.076241	C06G8.1	C06G8.1 /// WBGene00007384	hypothetical protein /// status:Confirmed
179046_at	1.21582	0.016457	F46A9.1	F46A9.1 /// WBGene00009754	hypothetical protein /// status:Confirmed
181747_at	1.21563	0.27157	T21B4.12	srx-118 /// WBGene00006009	Serpentine Receptor, class X /// locus:srx-118
178034_s_at	1.21513	0.30105	K08C9.1	K08C9.1 /// WBGene00010650	hypothetical protein /// status:Confirmed
174275_at	1.21513	0.11444	K08B12.2	dmd-7	DM (Doublesex/MAB-3) Domain family
189952_at	1.21504	0.22592	R08B4.1	grd-1	GRounDhog (hedgehog-like family)
175874_at	1.21491	0.060606	ZK105.3	WBGene00022654 /// ZK105.3	status:Partially_confirmed /// hypothetical protein
187906_at	1.21479	0.10515	F31F6.5	daf-6 /// WBGene00000902	abnormal DAuer Formation /// locus:daf-6
AFFX-Ce_catalase_M_s_at	1.2146	0.019945	---	---	---
181501_at	1.21454	0.067221	W07A12.6	oac-54 /// WBGene00012323	O-ACyltransferase homolog /// locus:oac-54
193104_at	1.21454	0.14853	T24D8.5	nlp-2 /// WBGene00003740	Neuropeptide-Like Protein /// locus:nlp-2
187669_at	1.21446	0.1931	K12C11.2	smo-1 /// WBGene00004888	SUMO (ubiquitin-related) homolog /// locus:smo-1
175569_at	1.2143	0.024683	Y66D12A.20	spe-6 /// WBGene00004960	defective SPErmatogenesis /// locus:spe-6
186502_at	1.21429	0.14517	Y38H6C.16	WBGene00012628 /// Y38H6C.16	status:Confirmed /// hypothetical protein
187999_at	1.21382	0.038018	K08H10.1	lea-1 /// WBGene00002263	plant Late Embryo Abundant (LEA) related /// locus:lea-1
180129_at	1.2136	0.21737	T06A4.2	mps-3 /// WBGene00020282	MiRP K channel accessory Subunit /// locus:mps-3
177089_at	1.21355	0.33949	Y55F3BR.5	madf-1 /// WBGene00021942	MADF domain transcription factor /// locus:madf-1
182752_s_at	1.2135	0.044656	Y43F8C.7	WBGene00012829 /// Y43F8C.7	status:Confirmed /// hypothetical protein
175158_s_at	1.21335	0.009372	T12A7.6	T12A7.6 /// WBGene00011727	hypothetical protein /// status:Partially_confirmed
190587_at	1.21307	0.046148	F59G1.2	tsp-18 /// WBGene00006644	TetraSPanin family /// locus:tsp-18
188371_at	1.21304	0.44834	C08H9.4	chitinase	hypothetical protein
178944_at	1.21303	0.17068	F45D3.2	F45D3.2 /// WBGene00009722	hypothetical protein /// status:Partially_confirmed
189107_at	1.21293	0.12151	B0511.4	tag-344 /// WBGene00015230	Temporarily Assigned Gene name /// locus:tag-344
191232_at	1.2122	0.16284	C33G8.11	nhr-107 /// WBGene00003697	Nuclear Hormone Receptor family /// locus:nhr-107
191712_s_at	1.21188	0.075301	C05E4.9	gei-7	GEX Interacting protein
179251_at	1.21155	0.014384	T28C6.5	T28C6.5 /// WBGene00012120	hypothetical protein /// status:Partially_confirmed
175025_at	1.21126	0.16369	T14B4.7	dpy-10	DumPY : shorter than wild-type
191649_at	1.21108	0.025336	AH10.1	AH10.1 /// WBGene00007082	hypothetical protein /// locus:acs-10
187450_at	1.21104	0.022381	cTel55X.1	cTel55X.1	hypothetical protein
182653_at	1.21077	0.47728	R07E4.3	R07E4.3 /// WBGene00019937	hypothetical protein /// status:Confirmed
174870_at	1.21048	0.13182	Y32F6A.3	pap-1 /// WBGene00012528	Poly-A Polymerase /// locus:pap-1
184507_at	1.21018	0.026802	C34F11.2	C34F11.2 /// WBGene00016414	hypothetical protein /// status:Confirmed
178327_s_at	1.21018	0.060595	R07E3.5	acl-5	ACyLtransferase-like
178202_at	1.21016	0.19655	F46B3.1	F46B3.1 /// WBGene00009756	hypothetical protein /// status:Confirmed
186419_at	1.20991	0.038772	T09E11.11	---	---
181667_s_at	1.20983	0.13066	F58A6.5	F58A6.5 /// WBGene00019024	hypothetical protein /// status:Confirmed
179699_at	1.20983	0.002729	R13F6.5	R13F6.5 /// WBGene00020066	hypothetical protein /// status:Partially_confirmed
AFFX-Ce_catalase_3_s_at	1.2098	0.018062	---	---	---
189634_at	1.20978	0.022229	F19B6.4	WBGene00008950 /// wht-5	locus:wht-5 /// WHiTe (Drosophila) related ABC transporte
172453_x_at	1.20962	0.07928	Y39B6A.30	WBGene00012689 /// Y39B6A.30	status:Partially_confirmed /// hypothetical protein
183752_at	1.20948	0.025576	T12A2.1	T12A2.1 /// WBGene00020436	hypothetical protein /// status:Partially_confirmed
185158_s_at	1.20895	0.028931	C33C12.4	C33C12.4 /// WBGene00016336	hypothetical protein /// status:Confirmed
188448_at	1.20887	0.20161	D1069.2	cpn-2 /// WBGene00000778	CalPoNin /// locus:cpn-2
192138_at	1.20883	0.079699	B0207.7	B0207.7 /// WBGene00015030	hypothetical protein /// serine/threonine-protein kinase
188377_at	1.20823	0.019958	T21D12.7	T21D12.7 /// WBGene00020648	hypothetical protein /// protease inhibitor
173292_at	1.20816	0.46512	MTCE.31	---	---
188183_at	1.20806	0.16006	T08G11.2	T08G11.2 /// WBGene00044684	hypothetical protein /// status:Partially_confirmed
188790_at	1.20798	0.034371	F34H10.3	F34H10.3 /// WBGene00009380	hypothetical protein /// protein S10
178073_s_at	1.2078	0.025722	F28H7.6	F28H7.6 /// WBGene00009239	hypothetical protein /// status:Partially_confirmed
187982_at	1.20769	0.030496	F26D2.2	syp-1 /// WBGene00006375	SYnaPsis in meiosis abnormal /// locus:syp-1
177643_at	1.2076	0.22911	T26C5.2	T26C5.2 /// WBGene00012032	hypothetical protein /// status:Partially_confirmed
193712_s_at	1.20759	0.17598	C14F11.6	C14F11.6 /// WBGene00015781	hypothetical protein /// DTDP-4-dehydrorhamnose 3,5-epimerase (RFBC gene)
181248_s_at	1.20756	0.21322	F16F9.2	dpy-6 /// WBGene00001068	DumPY : shorter than wild-type /// locus:dpy-6
186012_s_at	1.20754	0.1582	F57H12.6	F57H12.6 /// WBGene00019021	hypothetical protein /// status:Confirmed
188178_s_at	1.20751	0.17048	Y46G5A.25	snf-4	Sodium:Neurotransmitter symporter Family
187765_at	1.2075	0.1663	C25E10.12	C25E10.12 /// WBGene00016101	hypothetical protein /// status:Partially_confirmed
185627_at	1.20744	0.12598	C24D10.1	C24D10.1 /// WBGene00016053	hypothetical protein /// status:Partially_confirmed
183889_s_at	1.20692	0.11634	D1022.7	aka-1	A Kinase Anchor protein
173792_s_at	1.20643	0.34526	C28A5.6	C28A5.6 /// WBGene00007791	hypothetical protein /// serine/threonine kinase
179117_at	1.20639	0.055502	F32B4.2	F32B4.2 /// WBGene00009313	hypothetical protein /// status:Confirmed
180298_s_at	1.20623	0.070327	K02E11.1	ent-3 /// WBGene00010510	Equilibrative Nucleoside Transporter /// locus:ent-3
185076_at	1.20602	0.024238	F52F10.4	oac-32 /// WBGene00018708	O-ACyltransferase homolog /// locus:oac-32
184353_at	1.20597	0.06427	Y51H4A.22	WBGene00013116 /// Y51H4A.22	status:Partially_confirmed /// hypothetical protein
180743_at	1.20577	0.033592	F53B1.6	F53B1.6 /// WBGene00018738	hypothetical protein /// status:Partially_confirmed
186295_at	1.20531	0.17653	F36H12.3	F36H12.3 /// WBGene00018119	hypothetical protein /// status:Partially_confirmed
174244_at	1.20468	0.057504	Y39B6A.31	---	---
189430_at	1.2044	0.019083	C12D5.7	cyp-33A1 /// WBGene00015709	CYtochrome P450 family /// locus:cyp-33A1
192513_at	1.2042	0.020965	K07F5.4	kin-24	protein KINase
174491_at	1.20398	0.074609	F16A11.1	F16A11.1	hypothetical protein
181156_at	1.20371	0.003603	T08A9.8	spp-4 /// WBGene00004989	SaPosin-like Protein family /// locus:spp-4
191900_s_at	1.20351	0.008497	M04G7.2 /// ZK616.7	M04G7.2 /// WBGene00019773 /// WBGene00022777 /// ZK616.7	hypothetical protein /// protein-tyrosine phosphatase /// status:Partially_confirmed /// hypothetical protein
174544_at	1.20348	0.22956	C11E4.6	C11E4.6 /// WBGene00007520	hypothetical protein /// ankyrin repeats
173177_s_at	1.20302	0.035181	F21H7.2	F21H7.2 /// WBGene00009028	hypothetical protein /// status:Partially_confirmed
173990_s_at	1.20298	0.14058	T03E6.7	cpl-1 /// WBGene00000776	CathePsin L family /// locus:cpl-1
176801_s_at	1.20294	0.080753	Y51H7C.9	WBGene00021787 /// Y51H7C.9	status:Partially_confirmed /// hypothetical protein
187825_s_at	1.20279	0.027676	C17C3.1	C17C3.1	hypothetical protein
182718_s_at	1.20274	0.046042	F56B3.6	F56B3.6 /// WBGene00018930	hypothetical protein /// status:Partially_confirmed
188527_s_at	1.20274	0.19033	C42D8.5	acn-1	ACE(angiotensin converting enzyme)-like Non-peptidase
181786_at	1.20273	0.059764	C25H3.15 /// C25H3.16 /// C25H3.6	C25H3.15 /// C25H3.16 /// C25H3.6 /// WBGene00044391 /// WBGene00044392	hypothetical protein /// hypothetical protein /// hypothetical protein /// status:Partially_confirmed /// status:Confirmed
174644_at	1.20268	0.064535	F35G2.1	F35G2.1	hypothetical protein
178111_at	1.20247	0.032147	F59F5.7	F59F5.7 /// WBGene00010345	hypothetical protein /// status:Partially_confirmed
193175_at	1.20235	0.07767	T01B10.4	nhr-14	Nuclear Hormone Receptor family
175211_at	1.20184	0.16641	C13B9.4	pdfr-1	PDF Receptor homolog
173419_at	1.20184	0.041952	---	---	---
192880_at	1.20182	0.020632	C39E6.6	npr-1 /// WBGene00003807	Neuropeptide Receptor family /// locus:npr-1
186269_s_at	1.20163	0.063306	Y71F9B.16	dnj-30 /// WBGene00001048	DNaJ domain (prokaryotic heat shock protein) /// locus:dnj-30
180917_at	1.20087	0.006798	W02D7.4	W02D7.4 /// WBGene00020940	hypothetical protein /// status:Confirmed
188587_s_at	1.20045	0.028414	Y54G11A.13 /// Y54G11A.6	ctl-1 /// ctl-3 /// WBGene00000830 /// WBGene00013220	CaTaLase /// CaTaLase /// locus:ctl-1 /// locus:ctl-3
192478_at	1.20042	0.33323	K11D2.4	K11D2.4	hypothetical protein
172578_x_at	1.20031	0.010408	Y43F8B.2	Y43F8B.2	hypothetical protein
190510_at	1.19969	0.075675	W01B6.2	W01B6.2 /// WBGene00012169	hypothetical protein /// serine/threonine kinase
190233_s_at	1.19965	0.087202	T01G1.1	klp-12	Kinesin-Like Protein
184883_s_at	1.19959	0.065078	F49C12.15	F49C12.15 /// WBGene00009884	hypothetical protein /// status:Partially_confirmed
186784_at	1.19934	0.032209	Y38E10A.19	nhr-235 /// WBGene00012597	Nuclear Hormone Receptor family /// locus:nhr-235
175938_s_at	1.19923	0.10316	C30A5.4 /// R13A5.11	C30A5.4 /// R13A5.11 /// WBGene00016239 /// WBGene00020053	hypothetical protein /// hypothetical protein /// status:Predicted /// Protein phosphatase
181869_at	1.19899	0.021504	C34B2.4	C34B2.4 /// WBGene00016389	hypothetical protein /// status:Partially_confirmed
175982_at	1.19863	0.051382	EGAP5.1	EGAP5.1 /// WBGene00017150	hypothetical protein /// status:Partially_confirmed
186522_s_at	1.19862	0.29284	C17B7.10 /// T28A11.20	C17B7.10 /// T28A11.20 /// WBGene00015884 /// WBGene00020882	hypothetical protein /// hypothetical protein /// status:Partially_confirmed /// status:Partially_confirmed
188653_at	1.19819	0.009913	C44F1.2	attf-1 /// WBGene00008092	AT hook Transcription Factor family /// locus:attf-1
188675_at	1.19803	0.27176	C09G5.3	col-79 /// WBGene00000655	COLlagen /// locus:col-79
185199_s_at	1.19795	0.19602	F07G11.9	F07G11.9 /// WBGene00017233	hypothetical protein /// status:Partially_confirmed
190222_s_at	1.19779	0.084271	T21B4.4	T21B4.4	hypothetical protein
181357_s_at	1.19743	0.034958	T02H6.4 /// T02H6.7	T02H6.4 /// T02H6.7 /// WBGene00020174 /// WBGene00020177	hypothetical protein /// hypothetical protein /// status:Predicted /// status:Partially_confirmed
190446_s_at	1.19732	0.20225	C31H2.2	dpy-8 /// WBGene00001070	DumPY : shorter than wild-type /// locus:dpy-8
177609_at	1.19728	0.25097	C11H1.4	prx-1	PeRoXisome assembly factor
182411_at	1.19716	0.041692	Y37H2A.4	fbxa-107 /// WBGene00012564	F-box A protein /// locus:fbxa-107
189941_at	1.197	0.019506	C06G3.5	C06G3.5	hypothetical protein
187931_s_at	1.19695	0.046264	C27F2.6 /// F17C8.5	C27F2.6 /// twk-6 /// WBGene00006661 /// WBGene00016168	hypothetical protein /// TWiK family of potassium channels /// locus:twk-6 /// status:Partially_confirmed
174979_at	1.1966	0.082741	K10C3.2	K10C3.2 /// WBGene00010730	hypothetical protein /// cAMP-regulated phosphoprotein
176402_at	1.19657	0.014536	Y57E12B.3	WBGene00021963 /// Y57E12B.3	status:Partially_confirmed /// hypothetical protein
189198_s_at	1.19625	0.056606	F43D9.1	F43D9.1 /// WBGene00009653	hypothetical protein /// Band 4.1 domain
189282_at	1.19593	0.022266	C06B3.3	cyp-35C1 /// WBGene00007362	CYtochrome P450 family /// locus:cyp-35C1
186224_at	1.1959	0.2825	Y57G11C.499	WBGene00077762 /// Y57G11C.499	status:Predicted /// hypothetical protein
176029_at	1.19564	0.41524	Y55F3C.10	WBGene00044460 /// Y55F3C.10	status:Predicted /// hypothetical protein
179697_at	1.19532	0.34478	Y75B8A.6	WBGene00013543 /// Y75B8A.6	status:Partially_confirmed /// hypothetical protein
176796_at	1.19495	0.06698	C17G10.3 /// R09E10.1	C17G10.3 /// R09E10.1 /// WBGene00011171 /// WBGene00015917	hypothetical protein /// hypothetical protein /// status:Confirmed /// status:Partially_confirmed
180481_s_at	1.19487	0.33614	D1054.9	D1054.9	hypothetical protein
190303_s_at	1.19448	0.1089	Y66A7A.6	gly-8 /// WBGene00001633	GLYcosylation related /// locus:gly-8
189303_at	1.19437	0.080837	F56F3.4	F56F3.4 /// WBGene00010155	hypothetical protein /// Ubiquitin family
191817_s_at	1.19407	0.05225	F54F12.1	F54F12.1 /// WBGene00010072	hypothetical protein /// tyrosine protein phosphatase
173579_s_at	1.1938	0.16053	W04G3.2	W04G3.2 /// WBGene00012256	hypothetical protein /// status:Confirmed
187919_s_at	1.19374	0.048841	T09B4.7	T09B4.7 /// WBGene00020381	hypothetical protein /// status:Partially_confirmed
184496_s_at	1.19361	0.12646	W07B3.2	gei-4	GEX Interacting protein
178859_at	1.19358	0.011605	R09A8.5	R09A8.5 /// WBGene00011154	hypothetical protein /// status:Partially_confirmed
181972_at	1.19339	0.0314	W05E7.1	grd-3 /// WBGene00001692	GRounDhog (hedgehog-like family) /// locus:grd-3
177325_at	1.19335	0.081558	R57.2	R57.2 /// WBGene00020083	hypothetical protein /// status:Partially_confirmed
174308_at	1.19319	0.030191	ZC449.5	WBGene00022615 /// ZC449.5	status:Partially_confirmed /// hypothetical protein
175722_s_at	1.19317	0.015619	R11G1.4	sax-1	Sensory AXon guidance
178177_at	1.1929	0.19164	F25H5.2	F25H5.2 /// WBGene00009125	hypothetical protein /// status:Partially_confirmed
186817_at	1.19236	0.064199	Y116F11B.2	WBGene00013820 /// Y116F11B.2	status:Partially_confirmed /// hypothetical protein
180329_at	1.19218	0.1525	R12E2.5	inx-16 /// WBGene00002138	INneXin /// locus:inx-16
172343_x_at	1.19217	0.13565	B0213.6	nlp-31 /// WBGene00003769	Neuropeptide-Like Protein /// locus:nlp-31
175204_at	1.19208	0.23498	ZK829.3	WBGene00014094 /// ZK829.3	status:Partially_confirmed /// hypothetical protein
187614_at	1.19192	0.016442	C05D10.3	WBGene00015479 /// wht-1	locus:wht-1 /// WHiTe (Drosophila) related ABC transporte
177726_at	1.1919	0.09047	K01G5.9	K01G5.9 /// WBGene00010480	hypothetical protein /// status:Confirmed
188690_at	1.19181	0.050721	C04F12.3	ikb-1 /// WBGene00002069	I Kappa B homolog /// locus:ikb-1
183292_at	1.19169	0.093901	W09D10.5	W09D10.5 /// WBGene00012363	hypothetical protein /// status:Partially_confirmed
177370_s_at	1.19153	0.003602	Y6G8.2	Y6G8.2	hypothetical protein
177362_at	1.19147	0.002354	R102.10	R102.10 /// WBGene00011297	hypothetical protein /// status:Confirmed
172719_x_at	1.19048	0.032227	ZK1225.6	ssp-31 /// WBGene00006048	Sperm-Specific family, class P /// locus:ssp-31
186488_at	1.19015	0.007752	T15H9.4	T15H9.4 /// WBGene00011789	hypothetical protein /// status:Partially_confirmed
172465_x_at	1.19011	0.21994	---	---	---
177877_at	1.18978	0.074538	F35E2.5	F35E2.5 /// WBGene00009412	hypothetical protein /// status:Partially_confirmed
192308_s_at	1.1896	0.040167	T07F12.4	T07F12.4 /// WBGene00020324	hypothetical protein /// Serine/Threonine protein kinase
194057_at	1.18959	0.01259	F08A8.1	F08A8.1	hypothetical protein
183301_s_at	1.18937	0.086595	F35C5.12	F35C5.12 /// WBGene00009400	hypothetical protein /// status:Confirmed
185813_at	1.1892	0.30118	F58E1.11	fbxc-21 /// WBGene00019042	F-box C protein /// locus:fbxc-21
181790_at	1.18905	0.018684	F56F4.3	F56F4.3 /// WBGene00018980	hypothetical protein /// status:Partially_confirmed
182338_at	1.18857	0.063851	T05E7.1	T05E7.1 /// WBGene00020258	hypothetical protein /// status:Partially_confirmed
187867_at	1.18847	0.02079	F46G10.3	sir-2.3 /// WBGene00004802	yeast SIR related /// locus:sir-2.3
184637_at	1.18844	0.014384	Y47G6A.7	Y47G6A.7	hypothetical protein
173769_s_at	1.18834	0.23212	M176.8	---	---
177662_at	1.18832	0.039048	ZC443.4	WBGene00013899 /// ZC443.4	status:Confirmed /// hypothetical protein
182693_s_at	1.18827	0.04124	T04A11.2 /// T04A11.5	T04A11.2 /// T04A11.5 /// WBGene00011417 /// WBGene00011420	hypothetical protein /// hypothetical protein /// status:Predicted /// status:Predicted
189457_at	1.18774	0.022355	B0213.15	cyp-34A9	CYtochrome P450 family
192213_s_at	1.18773	0.10275	Y57G11A.1	tag-273	Temporarily Assigned Gene name
184981_at	1.1873	0.36528	F16G10.5	F16G10.5 /// WBGene00017520	hypothetical protein /// status:Partially_confirmed
187627_at	1.18717	0.085474	F46F11.3	tag-83 /// WBGene00006456	Temporarily Assigned Gene name /// locus:tag-83
189512_at	1.18712	0.20911	C03G6.15	cyp-35A2 /// WBGene00015400	CYtochrome P450 family /// locus:cyp-35A2
191833_s_at	1.18711	0.010836	K08F4.3	K08F4.3 /// WBGene00010678	hypothetical protein /// translocon-associated protein
173172_s_at	1.18689	0.11508	M28.1	cutl-9 /// WBGene00010893	CUTiclin-Like /// locus:cutl-9
189041_s_at	1.18634	0.059448	T21E8.1 /// T21E8.2	pgp-6 /// pgp-7 /// WBGene00004001	P-GlycoProtein related /// P-GlycoProtein related /// locus:pgp-7
174201_s_at	1.18622	0.097641	Y119C1B.5	WBGene00022471 /// Y119C1B.5	status:Partially_confirmed /// hypothetical protein
172901_x_at	1.18618	0.077919	T27E4.3 /// T27E4.9	hsp-16.48 /// hsp-16.49 /// WBGene00002019 /// WBGene00002020	Heat Shock Protein /// Heat Shock Protein /// locus:hsp-16.48 /// locus:hsp-16.49
174655_at	1.18604	0.23604	Y59H11AR.2	Y59H11AR.2	hypothetical protein
176434_s_at	1.18588	0.11797	Y105E8B.9	WBGene00013693 /// Y105E8B.9	status:Partially_confirmed /// hypothetical protein
179752_at	1.18557	0.033431	F17A9.1	fbxa-178 /// WBGene00017533	F-box A protein /// locus:fbxa-178
191680_at	1.18545	0.26591	Y40D12A.3	srh-40 /// WBGene00005263	Serpentine Receptor, class H /// locus:srh-40
174970_s_at	1.1854	0.07636	F35H12.2	tbc-11	TBC (Tre-2/Bub2/Cdc16) domain family
190851_at	1.18535	0.12632	F54D8.3	alh-1	ALdehyde deHydrogenase
176943_s_at	1.18528	0.20889	---	---	---
190339_at	1.18519	0.45262	F14B8.1	nhx-4	Na/H eXchanger
184128_s_at	1.18501	0.007752	Y45F3A.1	WBGene00012859 /// Y45F3A.1	status:Confirmed /// hypothetical protein
179706_at	1.1849	0.15347	F23C8.1	F23C8.1 /// WBGene00017731	hypothetical protein /// status:Partially_confirmed
178204_at	1.18479	0.10284	T23F6.2	T23F6.2 /// WBGene00011950	hypothetical protein /// status:Partially_confirmed
182178_at	1.18456	0.006064	D1005.2	D1005.2 /// WBGene00016996	hypothetical protein /// status:Confirmed
178837_at	1.18453	0.25705	K01C8.8	clec-142 /// WBGene00010460	C-type LECtin /// locus:clec-142
184996_at	1.18412	0.020975	F41C3.11	F41C3.11 /// WBGene00018275	hypothetical protein /// status:Confirmed
171825_at	1.18366	0.1108	---	R11F4.1	Hypothetical protein (R11F4.1)
173063_at	1.18354	0.48235	K07C11.9	cogc-6 /// WBGene00019481	Conserved Oligomeric Golgi (COG) Component /// locus:cogc-6
182356_at	1.18346	0.015451	T06A1.4	glb-25 /// WBGene00020279	GLoBin /// locus:glb-25
177278_at	1.18337	0.12198	ZK6.1	nhr-278 /// WBGene00022636	Nuclear Hormone Receptor family /// locus:nhr-278
190426_at	1.18316	0.057088	W04A4.4	W04A4.4 /// WBGene00012233	hypothetical protein /// calpain thiol protease
184766_at	1.18276	0.16486	Y9C9A.10	str-155 /// WBGene00006201	Seven TM Receptor /// locus:str-155
184939_at	1.18269	0.46304	F56E10.3	F56E10.3 /// WBGene00018977	hypothetical protein /// status:Partially_confirmed
188061_s_at	1.18259	0.28797	F52E4.6	WBGene00006948 /// wrt-2	locus:wrt-2 /// WaRThog (hedgehog-like family)
192672_s_at	1.18252	0.044116	F43D9.4	sip-1 /// WBGene00004798	Stress Induced Protein /// locus:sip-1
182052_at	1.18252	0.45225	F13B9.6	cutl-29 /// WBGene00017421	CUTiclin-Like /// locus:cutl-29
186430_at	1.18243	0.40781	B0207.11	B0207.11 /// WBGene00015034	hypothetical protein /// status:Partially_confirmed
180528_at	1.18221	0.004688	C08G5.2	fbxc-48 /// WBGene00015615	F-box C protein /// locus:fbxc-48
175945_at	1.18215	0.015859	Y57A10A.1 /// Y73B3B.2	set-28 /// WBGene00013246 /// WBGene00022224	SET (trithorax/polycomb) domain containing /// status:Partially_confirmed /// locus:set-28
192901_s_at	1.18204	0.006784	C18B12.4	C18B12.4 /// WBGene00007666	hypothetical protein /// Zinc finger, C3HC4 type (RING finger)
179569_at	1.18198	0.11421	F55C9.5	F55C9.5 /// WBGene00010102	hypothetical protein /// status:Confirmed
173238_s_at	1.18195	0.063129	K11D12.4	cpt-4 /// WBGene00019644	Carnitine Palmitoyl Transferase /// locus:cpt-4
176016_at	1.1819	0.3024	M02H5.5	nhr-203 /// WBGene00019743	Nuclear Hormone Receptor family /// locus:nhr-203
185088_at	1.18174	0.003184	F11G11.4	F11G11.4 /// WBGene00017384	hypothetical protein /// status:Confirmed
181609_at	1.18139	0.062607	T05C12.8	T05C12.8 /// WBGene00011471	hypothetical protein /// status:Partially_confirmed
175739_s_at	1.18113	0.41214	JC8.10	unc-26	UNCoordinated
186530_at	1.18101	0.18384	Y116F11A.3	WBGene00013817 /// Y116F11A.3	status:Partially_confirmed /// hypothetical protein
187236_at	1.18098	0.28075	Y116F11B.13	WBGene00013828 /// Y116F11B.13	status:Partially_confirmed /// hypothetical protein
172066_x_at	1.18069	0.053017	C06E1.4	glr-1 /// WBGene00001612	GLutamate Receptor family (AMPA) /// locus:glr-1
172200_x_at	1.18049	0.1256	C28D4.5	C28D4.5 /// WBGene00007793	hypothetical protein /// status:Partially_confirmed
188350_at	1.18046	0.091847	B0024.1	col-149 /// WBGene00000722	COLlagen /// locus:col-149
184815_at	1.18035	0.26716	F28E10.4	F28E10.4 /// WBGene00017902	hypothetical protein /// status:Partially_confirmed
179976_at	1.18035	0.37444	Y68A4A.7	srh-113 /// WBGene00005332	Serpentine Receptor, class H /// locus:srh-113
179643_at	1.18022	0.27934	Y6E2A.6	srh-140 /// WBGene00005357	Serpentine Receptor, class H /// locus:srh-140
193691_at	1.18004	0.28687	F26H9.8	F26H9.8 /// WBGene00009178	hypothetical protein /// UDP-glucose:glycoprotein glucosyltransferase like
171802_s_at	1.18003	0.39437	Y75B8A.24	WBGene00013557 /// Y75B8A.24	Phosphoinositide 3-kinase family, accessory domain (PIK domain) ; Phosphatidylinositol 3- and 4-kinases /// hypothetical protein
189236_s_at	1.18002	0.008527	W03A3.2	polq-1 /// WBGene00020964	POLQ (DNA polymerase theta) homolog /// locus:polq-1
175808_s_at	1.18001	0.062518	C12D8.10	akt-1	AKT kinase family
178006_at	1.17985	0.27581	F25D1.3	F25D1.3 /// WBGene00009108	hypothetical protein /// status:Confirmed
184586_s_at	1.17976	0.08197	T09B4.10	chn-1 /// WBGene00000500	C-term of Hsp70-iNteracting protein (CHIP family) /// locus:chn-1
191562_at	1.17937	0.5	C25F6.2	dlg-1	Drosophila Discs Large homolog
177718_at	1.17931	0.23423	F36G9.3	F36G9.3 /// WBGene00009485	hypothetical protein /// status:Partially_confirmed
192616_at	1.1791	0.04561	W06F12.3	W06F12.3 /// WBGene00012307	hypothetical protein /// serine/threonine kinase
173096_at	1.17898	0.056187	K08D12.6	K08D12.6 /// WBGene00019540	hypothetical protein /// status:Confirmed
178940_at	1.17881	0.37444	F15A2.5	efn-3 /// WBGene00001164	Eph(F)riN /// locus:efn-3
188441_at	1.17875	0.045593	F21F8.4	protease /// WBGene00017678	hypothetical protein /// protease
191421_at	1.17866	0.05414	C54F6.10	str-31 /// WBGene00006097	Seven TM Receptor /// locus:str-31
189017_at	1.1786	0.02504	F30F8.2	glutaminase /// WBGene00009271	hypothetical protein /// glutaminase
175676_at	1.17842	0.43701	F54B11.3	unc-84	UNCoordinated
184347_at	1.17837	0.004114	F22H10.6	F22H10.6 /// WBGene00017730	hypothetical protein /// status:Partially_confirmed
182495_at	1.17827	0.059979	Y37H2A.5	fbxa-210 /// WBGene00012565	F-box A protein /// locus:fbxa-210
181766_at	1.17808	0.4409	ZK1025.4	ZK1025.4	hypothetical protein
188854_s_at	1.17804	0.001068	Y49E10.4	Thioredoxin /// WBGene00013030	hypothetical protein /// Thioredoxin
179421_at	1.1779	0.48826	T10H4.4	T10H4.4 /// WBGene00011697	hypothetical protein /// status:Predicted
176398_at	1.17789	0.084265	Y71G12B.10	WBGene00022150 /// Y71G12B.10	status:Confirmed /// hypothetical protein
189390_at	1.17769	0.26109	B0304.3	cyp-23A1 /// WBGene00015135	CYtochrome P450 family /// locus:cyp-23A1
178138_at	1.17765	0.30684	F38B7.2	F38B7.2	hypothetical protein
181290_at	1.17755	0.10444	F22F7.2	F22F7.2 /// WBGene00017720	hypothetical protein /// status:Partially_confirmed
190019_at	1.17729	0.046793	F22E12.2	chw-1 /// WBGene00009059	CHp/Wrch Rho-like protein homolog /// locus:chw-1
190493_at	1.17711	0.39253	F10F2.8	clec-153 /// WBGene00008660	C-type LECtin /// locus:clec-153
187369_s_at	1.17695	0.16492	C32D5.3	C32D5.3 /// WBGene00016311	hypothetical protein /// status:Partially_confirmed
171865_x_at	1.17682	0.37828	---	---	---
173313_s_at	1.17673	0.22659	C01F1.1	C01F1.1 /// WBGene00015296	hypothetical protein /// dna binding protein
188103_s_at	1.17649	0.49184	C11D2.6	nca-1	Novel Channel type/putative Nematode CAlcium channel
176324_at	1.17649	0.048113	Y22D7AL.9	WBGene00021247 /// Y22D7AL.9	status:Partially_confirmed /// hypothetical protein
189405_at	1.17642	0.26762	F14H3.10	cyp-35D1 /// WBGene00008829	CYtochrome P450 family /// locus:cyp-35D1
178372_at	1.1761	0.088482	ZK829.3	WBGene00014094 /// ZK829.3	status:Partially_confirmed /// hypothetical protein
172286_x_at	1.17607	0.27245	W09C3.8	W09C3.8 /// WBGene00021115	hypothetical protein /// status:Partially_confirmed
193239_at	1.17589	0.006288	C41C4.3	C41C4.3 /// WBGene00008051	hypothetical protein /// Leucine Rich Repeat (2 copies) (2 domains)
174483_at	1.17585	0.061062	---	---	---
176005_at	1.17577	0.011939	Y41D4A.5	WBGene00021507 /// Y41D4A.5	status:Confirmed /// hypothetical protein
176670_at	1.17574	0.00925	F44E2.10	F44E2.10 /// WBGene00018423	hypothetical protein /// status:Partially_confirmed
179279_at	1.17565	0.004111	T03F7.3	srh-46 /// WBGene00005269	Serpentine Receptor, class H /// locus:srh-46
179312_at	1.17564	0.40648	F17A2.8	srd-44 /// WBGene00005122	Serpentine Receptor, class D (delta) /// locus:srd-44
175866_s_at	1.1756	0.001709	Y69A2AR.32	Y69A2AR.32	hypothetical protein
177532_at	1.17522	0.24753	F22B5.4	F22B5.4 /// WBGene00009042	hypothetical protein /// status:Confirmed
184244_at	1.17522	0.00663	Y32B12B.2	WBGene00012522 /// Y32B12B.2	status:Partially_confirmed /// hypothetical protein
181397_at	1.17494	0.16844	K09C6.6	K09C6.6 /// WBGene00019560	hypothetical protein /// status:Partially_confirmed
173876_s_at	1.17458	0.017209	C17G10.8	dhs-6 /// WBGene00000970	DeHydrogenases, Short chain /// locus:dhs-6
179093_at	1.17447	0.069485	T16G1.4	T16G1.4 /// WBGene00011798	hypothetical protein /// status:Partially_confirmed
191322_at	1.17438	0.071232	C15H11.2	gnrr-2 /// WBGene00007614	human GoNadotropin-Releasing hormone Receptor (GnRHR) related /// locus:gnrr-2
178857_at	1.17422	0.048841	T05A1.5	T05A1.5	hypothetical protein
178221_at	1.17415	0.16935	F21C3.4	rde-2	RNAi DEfective
189801_s_at	1.17378	0.11875	C50B8.1	C50B8.1 /// WBGene00008224	hypothetical protein /// RNA binding protein
178799_at	1.1736	0.000186	F14D7.10 /// F14D7.7	F14D7.7 /// WBGene00008794 /// WBGene00008797	hypothetical protein /// status:Partially_confirmed /// status:Predicted
191882_at	1.17341	0.28568	F47C10.6	ugt-32 /// WBGene00018543	UDP-GlucuronosylTransferase /// locus:ugt-32
185136_at	1.1734	0.33131	Y45F10A.7	Y45F10A.7	hypothetical protein
174871_at	1.1731	0.036271	F41E6.13	atg-18	AuTophaGy (yeast Atg homolog)
184891_at	1.17304	0.14302	C39D10.5	C39D10.5 /// WBGene00016532	hypothetical protein /// status:Confirmed
189548_s_at	1.17284	0.12253	T04A11.11 /// ZC239.1	nhr-88	Clone yk667b12 nuclear receptor NHR-88
190330_s_at	1.17267	0.007241	F25E2.3	F25E2.3 /// WBGene00017781	hypothetical protein /// acyl-CoA thioesterase
174993_at	1.17251	0.061068	T14G11.1	T14G11.1 /// WBGene00020510	hypothetical protein /// status:Partially_confirmed
187110_at	1.17245	0.071131	Y105C5A.25	---	---
189067_s_at	1.17241	0.046181	T19B4.1	monooxygenase /// WBGene00020556	hypothetical protein /// monooxygenase
178563_at	1.17231	0.17088	T16G1.6	T16G1.6 /// WBGene00011800	hypothetical protein /// status:Confirmed
191756_s_at	1.17211	0.31599	R10D12.1	R10D12.1 /// WBGene00011185	hypothetical protein /// sodium/phosphate transporter
182209_s_at	1.171	0.032162	T05E7.5	T05E7.5 /// WBGene00020261	hypothetical protein /// status:Partially_confirmed
173425_at	1.17085	0.19348	F46E10.9	dpy-11 /// WBGene00001073	DumPY : shorter than wild-type /// locus:dpy-11
183380_at	1.17073	0.44345	F10E7.3	F10E7.3 /// WBGene00017345	hypothetical protein /// status:Predicted
190553_at	1.17065	0.006213	F01G10.7	F01G10.7 /// WBGene00008510	hypothetical protein /// triacylglycerol lipase
175530_s_at	1.17064	0.083207	Y41D4A.5	WBGene00021507 /// Y41D4A.5	status:Confirmed /// hypothetical protein
192680_at	1.17061	0.029467	C11H1.4	prx-1	PeRoXisome assembly factor
174666_at	1.17035	0.16887	K10B2.5	ani-2 /// WBGene00019608	ANIllin (actin binding protein) /// locus:ani-2
171828_x_at	1.17009	0.010204	W01A8.1	mdt-28	MeDiaTor
175035_at	1.17003	0.077716	H19M22.3	protease	hypothetical protein
182370_at	1.16981	0.28376	K03C7.3	K03C7.3 /// WBGene00019359	hypothetical protein /// status:Predicted
172440_x_at	1.16978	0.35499	F46F5.6	F46F5.6 /// WBGene00018497	hypothetical protein /// status:Confirmed
190002_at	1.1697	0.13756	C33C12.8	glucosylceramidase /// WBGene00016340	hypothetical protein /// glucosylceramidase
193477_s_at	1.16966	0.10554	E01G6.1	E01G6.1 /// WBGene00008449	hypothetical protein /// pancreatic trypsin inhibitor (kunitz) protein
188679_s_at	1.16951	0.026766	F52E1.10	vha-18 /// WBGene00018698	Vacuolar H ATPase /// locus:vha-18
175975_at	1.16946	0.095938	M02H5.3	nhr-201 /// WBGene00019741	Nuclear Hormone Receptor family /// locus:nhr-201
188917_s_at	1.16935	0.061739	F26H11.2	nurf-1	NURF (nucleosome remodeling factor) complex homolog
177950_s_at	1.16902	0.019013	W01A8.1	mdt-28	MeDiaTor
176885_at	1.16874	0.038797	T27F7.2	shc-2	SHC (Src Homology domain C-terminal) adaptor homolog
185074_at	1.16874	0.042519	F28A12.2	grl-12 /// WBGene00001721	GRound-Like (grd related) /// locus:grl-12
174704_at	1.16836	0.20492	F56H1.5	F56H1.5 /// WBGene00018995	hypothetical protein /// status:Partially_confirmed
190060_at	1.16802	0.47635	B0546.1	mai-2 /// WBGene00015248	Mitochondrial ATPase Inhibitor family /// locus:mai-2
181078_at	1.16787	0.16492	K04F1.6	K04F1.6 /// WBGene00019385	hypothetical protein /// status:Predicted
181265_at	1.16785	0.14185	R12E2.2	R12E2.2 /// WBGene00020031	hypothetical protein /// status:Confirmed
188568_at	1.16766	0.32488	C02G6.2	peptidase /// WBGene00015360	hypothetical protein /// peptidase
177318_at	1.16755	0.014906	M70.1	M70.1 /// WBGene00019783	hypothetical protein /// status:Partially_confirmed
189981_at	1.16755	0.22391	K02D7.2	K02D7.2 /// WBGene00019299	hypothetical protein /// zinc finger protein
192573_at	1.16742	0.12776	C15C8.2	cky-1	CKY homolog
185845_at	1.16741	0.15087	Y24F12A.1	WBGene00012496 /// Y24F12A.1	status:Partially_confirmed /// hypothetical protein
184885_at	1.1673	0.4824	W10G11.2	W10G11.2 /// WBGene00021135	hypothetical protein /// status:Confirmed
172880_x_at	1.16715	0.092207	C55C3.4	C55C3.4 /// WBGene00016954	hypothetical protein /// tyrosine-protein kinase
191602_s_at	1.16693	0.17314	Y11D7A.14	WBGene00012437 /// Y11D7A.14	Myosin head (motor domain) /// hypothetical protein
175243_at	1.16692	0.012475	T21H3.3	cmd-1 /// WBGene00000552	CalModulin /// locus:cmd-1
184135_s_at	1.16689	0.11753	F49E8.1	F49E8.1 /// WBGene00018635	hypothetical protein /// status:Confirmed
173183_s_at	1.16684	0.076965	T08B2.9	frs-1	phenylalanyl (F) tRNA Synthetase
190397_s_at	1.1668	0.10608	W02B12.7	klp-17 /// WBGene00002227	Kinesin-Like Protein /// locus:klp-17
178264_at	1.1666	0.008107	F01D5.8	F01D5.8 /// WBGene00008498	hypothetical protein /// status:Confirmed
178991_s_at	1.16659	0.16488	F21G4.6	F21G4.6 /// WBGene00009027	hypothetical protein /// status:Partially_confirmed
183228_at	1.16631	0.0057	C17C3.5	C17C3.5 /// WBGene00015890	hypothetical protein /// status:Partially_confirmed
184868_at	1.16628	0.066145	F12A10.1 /// F12A10.9	F12A10.1 /// F12A10.9 /// WBGene00017390 /// WBGene00077704	hypothetical protein /// hypothetical protein /// status:Confirmed /// status:Partially_confirmed
185429_at	1.16618	0.40572	C25E10.7	C25E10.7 /// WBGene00016096	hypothetical protein /// status:Partially_confirmed
183514_s_at	1.1661	0.17497	F47G6.3	F47G6.3 /// WBGene00018580	hypothetical protein /// status:Partially_confirmed
181159_s_at	1.16606	0.45767	F15E6.9	F15E6.9 /// WBGene00017489	hypothetical protein /// status:Partially_confirmed
181986_at	1.16598	0.1127	R12B2.3	R12B2.3 /// WBGene00020019	hypothetical protein /// status:Confirmed
186023_s_at	1.16596	0.067062	C44B12.5	C44B12.5 /// WBGene00016638	hypothetical protein /// status:Partially_confirmed
189810_at	1.16588	0.091368	ZK1320.4	cyp-13A10 /// WBGene00014254	CYtochrome P450 family /// locus:cyp-13A10
187363_at	1.16587	0.44598	B0034.4	B0034.4 /// WBGene00015004	hypothetical protein /// status:Partially_confirmed
174891_s_at	1.16584	0.26543	F08F1.7	tag-123 /// WBGene00006472	Temporarily Assigned Gene name /// locus:tag-123
189578_at	1.16573	0.2581	T10B9.2	cyp-13A5 /// WBGene00011672	CYtochrome P450 family /// locus:cyp-13A5
186745_s_at	1.1656	0.13389	Y38E10A.17	WBGene00012595 /// Y38E10A.17	status:Partially_confirmed /// hypothetical protein
192909_at	1.16529	0.017121	D2030.2	D2030.2	hypothetical protein
192483_at	1.1648	0.11963	Y43F4A.1	Y43F4A.1	hypothetical protein
182387_at	1.16476	0.10054	Y37D8A.3	WBGene00012545 /// Y37D8A.3	status:Confirmed /// hypothetical protein
176176_s_at	1.16473	0.11149	Y119C1B.1	WBGene00022467 /// Y119C1B.1	status:Partially_confirmed /// hypothetical protein
176061_at	1.16442	0.036118	ZK686.4	WBGene00022794 /// ZK686.4	status:Confirmed /// hypothetical protein
181573_at	1.16397	0.029316	K05F1.8	K05F1.8 /// WBGene00019409	hypothetical protein /// status:Confirmed
191355_at	1.16381	0.03846	C07G3.6	str-225 /// WBGene00006256	Seven TM Receptor /// locus:str-225
186305_at	1.16374	0.19364	H04M03.1	H04M03.1 /// WBGene00019151	hypothetical protein /// status:Partially_confirmed
192710_s_at	1.16373	0.18798	Y42A5A.1	WBGene00012776 /// Y42A5A.1	Zinc-binding metalloprotease domain /// hypothetical protein
173442_at	1.16365	0.28695	T02C12.1	hum-5 /// WBGene00002038	Heavy chain, Unconventional Myosin /// locus:hum-5
191489_s_at	1.16364	0.10057	ZK524.2	unc-13	UNCoordinated
176665_s_at	1.16353	0.39057	Y71H2AM.19	WBGene00002244 /// Y71H2AM.19	locus:laf-1 /// hypothetical protein
179795_s_at	1.16349	0.030176	C04C3.5	dyf-3	abnormal DYe Filling
191455_s_at	1.16341	0.076939	C34G6.4	pgp-2 /// WBGene00003996	P-GlycoProtein related /// locus:pgp-2
189965_at	1.16315	0.089627	T01G6.5	nhr-211 /// WBGene00020152	Nuclear Hormone Receptor family /// locus:nhr-211
173568_at	1.16312	0.16341	C27A12.6	C27A12.6 /// WBGene00016156	hypothetical protein /// status:Partially_confirmed
174627_at	1.16279	0.003374	F47A4.5	F47A4.5 /// WBGene00009801	hypothetical protein /// patatin domain and ankyrin-like domain
185336_s_at	1.16278	0.36221	F10D2.10	F10D2.10 /// WBGene00017335	hypothetical protein /// status:Confirmed
193974_s_at	1.1627	0.074121	C34F6.1	C34F6.1 /// WBGene00007938	hypothetical protein /// Kunitz/Bovine pancreatic trypsin inhibitor domain (8 domains)
185981_s_at	1.16231	0.10263	F37A8.2 /// Y45F10B.2	F37A8.2 /// WBGene00009502	hypothetical protein /// status:Partially_confirmed
191743_at	1.1623	0.1307	H06O01.3	ctg-1 /// WBGene00010370	CRAL/TRIO and GOLD domain containing /// locus:ctg-1
175303_at	1.16221	0.024018	C07D10.2	bath-44	BTB and MATH domain containing
186865_at	1.16211	0.36907	R07B1.5	R07B1.5 /// WBGene00011077	hypothetical protein /// status:Partially_confirmed
173773_s_at	1.16185	0.1013	C16D9.2	rol-3	ROLler: helically twisted, animals roll when moving
189587_s_at	1.16171	0.071956	W03F9.4	acetyltransferase /// WBGene00021002	hypothetical protein /// acetyltransferase
191634_at	1.16113	0.18735	Y40H4A.2	WBGene00012741 /// Y40H4A.2	Ser/Thr protein phosphatase /// hypothetical protein
185305_at	1.16109	0.029562	Y54H5A.3	tag-262 /// WBGene00021901	Temporarily Assigned Gene name /// locus:tag-262
179302_at	1.16097	0.025987	F22B8.7	F22B8.7 /// WBGene00009049	hypothetical protein /// status:Confirmed
186994_at	1.16087	0.15239	Y53G8AR.3	ral-1 /// WBGene00021811	RAL (Ras-related GTPase) homolog /// locus:ral-1
191957_at	1.16081	0.009902	C05C8.7	C05C8.7 /// WBGene00015464	hypothetical protein /// mannose-6-phosphate isomerase
172031_x_at	1.1607	0.2868	T01D1.2	etr-1	ELAV-Type RNA binding protein family
190434_s_at	1.16052	0.21457	F33C8.3	tsp-8 /// WBGene00006634	TetraSPanin family /// locus:tsp-8
191535_at	1.16046	0.095292	T28F4.3	T28F4.3 /// WBGene00012138	hypothetical protein /// protein-tyrosine phosphatase
188050_at	1.16035	0.032378	F47B8.11	sss-2 /// WBGene00006057	Sperm-Specific family, class S /// locus:sss-2
185628_at	1.16024	0.018253	F21D12.3	F21D12.3 /// WBGene00017663	hypothetical protein /// status:Partially_confirmed
184980_at	1.16022	0.11132	F56C11.5	F56C11.5	hypothetical protein
190400_at	1.16004	0.029949	F11A3.1	F11A3.1 /// WBGene00008669	hypothetical protein /// locus:acs-14
192552_at	1.16001	0.021505	F42F12.2	WBGene00006979 /// zig-2	locus:zig-2 /// 2 (Zwei) IG-domain protein
180130_at	1.15981	0.19506	B0334.10	B0334.10 /// WBGene00007148	hypothetical protein /// status:Partially_confirmed
190984_at	1.15975	0.151	C49A1.2	C49A1.2 /// WBGene00008185	hypothetical protein /// Putative membrane protein
172193_at	1.1595	0.008889	T12D8.5	T12D8.5 /// WBGene00011733	hypothetical protein /// status:Confirmed
189406_at	1.1594	0.19983	C07E3.6	C07E3.6 /// WBGene00007417	hypothetical protein /// status:Confirmed
183658_at	1.15938	0.2618	C50F7.3	C50F7.3 /// WBGene00016843	hypothetical protein /// status:Partially_confirmed
184291_s_at	1.15895	0.069711	T24C12.3	T24C12.3 /// WBGene00020765	hypothetical protein /// status:Partially_confirmed
AFFX-BioC-3_at	1.15869	0.44996	---	---	---
181617_at	1.15865	0.10583	T08B1.5	fbxa-201 /// WBGene00020342	F-box A protein /// locus:fbxa-201
179545_at	1.15862	0.065199	C14A6.12 /// C14A6.5	C14A6.12 /// C14A6.5 /// WBGene00007569 /// WBGene00050955	hypothetical protein /// hypothetical protein /// status:Predicted /// status:Predicted
174759_s_at	1.15857	0.48481	F44A2.1	tag-153	Temporarily Assigned Gene name
179894_at	1.15845	0.034542	F47B10.9	F47B10.9 /// WBGene00009820	hypothetical protein /// status:Confirmed
187960_at	1.15843	0.2363	K07F5.11	ssq-1 /// WBGene00006050	Sperm-Specific family, class Q /// locus:ssq-1
179358_at	1.15836	0.19246	F40D4.1	srh-174 /// WBGene00005390	Serpentine Receptor, class H /// locus:srh-174
187165_at	1.15831	0.015914	C28C12.11	C28C12.11	hypothetical protein
187937_s_at	1.15821	0.16176	F46B6.12	F46B6.12 /// WBGene00009776	hypothetical protein /// status:Confirmed
183820_at	1.15818	0.058841	F32B5.4	F32B5.4 /// WBGene00017978	hypothetical protein /// status:Confirmed
173263_s_at	1.15795	0.006764	K11H3.1	gpdh-2	Glycerol-3-Phosphate DeHydrogenase
175325_at	1.15778	0.11407	T28B4.1	T28B4.1	hypothetical protein
180790_at	1.15772	0.26348	F45E4.4	tag-199 /// WBGene00007061	Temporarily Assigned Gene name /// locus:tag-199
184108_s_at	1.1577	0.007766	ZK1225.4	WBGene00014238 /// ZK1225.4	status:Partially_confirmed /// hypothetical protein
186123_at	1.1575	0.20226	K08B12.3	K08B12.3 /// WBGene00019522	hypothetical protein /// status:Partially_confirmed
190170_s_at	1.15737	0.031009	W09D12.1	W09D12.1 /// WBGene00012364	hypothetical protein /// zinc metalloprotease
183736_at	1.15715	0.04659	B0511.3	fbxa-125 /// WBGene00015229	F-box A protein /// locus:fbxa-125
178266_at	1.15715	0.17767	C07E3.8	C07E3.8 /// WBGene00007418	hypothetical protein /// status:Confirmed
189628_at	1.1571	0.018543	R01E6.3	cah-4	Carbonic AnHydrase
189341_s_at	1.15708	0.18048	ZC376.3	carboxylesterase /// WBGene00013875	hypothetical protein /// carboxylesterase
172340_x_at	1.15685	0.28906	C35B1.3	C35B1.3 /// WBGene00016433	hypothetical protein /// status:Confirmed
178466_at	1.15643	0.13472	C25G4.8	C25G4.8 /// WBGene00007735	hypothetical protein /// status:Partially_confirmed
174745_at	1.15634	0.019436	ZK1067.6	sym-2 /// WBGene00006367	SYnthetic lethal with Mec /// locus:sym-2
185028_at	1.15628	0.45958	W04H10.1	W04H10.1 /// WBGene00021030	hypothetical protein /// status:Partially_confirmed
187842_s_at	1.1562	0.005223	F43E2.12	---	---
179837_s_at	1.15606	0.034954	ZK112.7	cdh-3 /// WBGene00000395	CaDHerin family /// locus:cdh-3
186099_at	1.156	0.034706	Y41G9A.2	WBGene00021526 /// Y41G9A.2	status:Partially_confirmed /// hypothetical protein
172491_x_at	1.15593	0.087152	---	---	---
180988_at	1.15559	0.12592	Y43F8A.1	WBGene00012808 /// Y43F8A.1	status:Predicted /// hypothetical protein
193581_at	1.15554	0.097773	F26C11.2	unc-4 /// WBGene00006744	UNCoordinated /// locus:unc-4
176595_at	1.15554	0.11548	Y97E10AR.2	Y97E10AR.2	hypothetical protein
194068_s_at	1.15554	0.084313	T23G11.6	T23G11.6	hypothetical protein
187550_at	1.15514	0.37516	R07B7.12	R07B7.12	hypothetical protein
183005_at	1.15507	0.12463	F32B5.2	F32B5.2 /// WBGene00017976	hypothetical protein /// status:Partially_confirmed
184316_at	1.15492	0.007908	F15E11.4	F15E11.4 /// WBGene00017493	hypothetical protein /// status:Partially_confirmed
188877_at	1.15485	0.017209	T04A8.3	clec-155	C-type LECtin
176257_at	1.15471	0.004046	Y22D7AR.2	WBGene00021256 /// Y22D7AR.2	status:Partially_confirmed /// hypothetical protein
180197_at	1.15463	0.36945	F07E5.1	fbxb-6 /// WBGene00017207	F-box B protein /// locus:fbxb-6
179513_at	1.15439	0.084263	ZK550.2	WBGene00013996 /// ZK550.2	status:Partially_confirmed /// hypothetical protein
171838_x_at	1.15435	0.21704	B0334.8	age-1 /// WBGene00000090	AGEing alteration /// locus:age-1
189573_s_at	1.15426	0.19139	H19N07.1	H19N07.1 /// WBGene00010405	hypothetical protein /// elongation factor
188789_at	1.15414	0.000122	C30H6.8	Thioredoxins /// WBGene00007825	hypothetical protein /// Thioredoxins
187618_at	1.15414	0.074805	Y46G5A.31	gsy-1 /// WBGene00001793	Glycogen SYnthase /// locus:gsy-1
191104_at	1.1541	0.006516	C02C2.3	cup-4 /// WBGene00000845	Coelomocyte UPtake defective /// locus:cup-4
185760_s_at	1.15409	0.19313	W03G1.2 /// Y52D5A.1	W03G1.2 /// WBGene00021010 /// WBGene00021792 /// Y52D5A.1	hypothetical protein /// status:Partially_confirmed /// status:Partially_confirmed /// hypothetical protein
181965_at	1.15396	0.008973	C03H5.2	C03H5.2 /// WBGene00015404	hypothetical protein /// status:Confirmed
173620_s_at	1.15395	0.22382	C03A7.11	ugt-51 /// WBGene00015369	UDP-GlucuronosylTransferase /// locus:ugt-51
183666_at	1.15393	0.28961	C52D10.13	col-138 /// WBGene00000711	COLlagen /// locus:col-138
176447_at	1.15387	0.36046	---	---	---
173339_at	1.15382	0.10535	---	---	---
186794_s_at	1.15362	0.11588	Y46G5A.22	Y46G5A.22	hypothetical protein
177734_at	1.15338	0.10678	R10E9.3	R10E9.3	hypothetical protein
183224_at	1.15317	0.12959	F43C9.3	F43C9.3 /// WBGene00018377	hypothetical protein /// status:Partially_confirmed
180041_at	1.15313	0.029011	Y49A3A.4	WBGene00013027 /// Y49A3A.4	status:Partially_confirmed /// hypothetical protein
173952_at	1.15287	0.041007	ZK858.6	ZK858.6	hypothetical protein
AFFX-r2-Ec-bioD-3_at	1.15276	0.10783	---	---	---
174992_at	1.15267	0.42368	ZC123.3	WBGene00022518 /// ZC123.3	zinc finger protein /// hypothetical protein
190498_at	1.15257	0.1342	F10F2.6	clec-152	C-type LECtin
175741_s_at	1.15245	0.17496	H39E23.1	par-1	abnormal embryonic PARtitioning of cytoplasm
193929_s_at	1.15216	0.040872	D2089.5	gbh-1 /// WBGene00001522	Gamma Butyrobetaine Hydroxylase /// locus:gbh-1
175908_at	1.15203	0.1832	Y67D8A.3	WBGene00022060 /// Y67D8A.3	status:Confirmed /// hypothetical protein
191772_at	1.15199	0.002717	C02F5.7 /// C30A5.2	C02F5.7 /// rfs-1 /// WBGene00004342	hypothetical protein /// Rad-51 (Fifty one) like, Short /// locus:rfs-1
174617_at	1.15196	0.064199	---	---	---
182586_at	1.15194	0.037594	T13C5.3	T13C5.3 /// WBGene00020484	hypothetical protein /// status:Confirmed
191667_at	1.15185	0.013	Y48A6B.9	WBGene00012970 /// Y48A6B.9	Zinc-binding dehydrogenases /// hypothetical protein
187247_at	1.15176	0.17664	F59B10.5	F59B10.5 /// WBGene00010321	hypothetical protein /// status:Confirmed
181709_at	1.15176	0.057155	C29F5.2	sdz-3 /// WBGene00016211	SKN-1 Dependent Zygotic transcript /// locus:sdz-3
188835_at	1.15139	0.020639	F22B8.5	str-7 /// WBGene00006075	Seven TM Receptor /// locus:str-7
191864_s_at	1.15122	0.045286	D2092.1	D2092.1	hypothetical protein
182884_at	1.15116	0.004436	C09F12.2	C09F12.2 /// WBGene00007482	hypothetical protein /// status:Confirmed
182151_at	1.15105	0.17858	F29D10.1	F29D10.1 /// WBGene00009250	hypothetical protein /// status:Partially_confirmed
186824_at	1.151	0.4126	Y113G7A.10	spe-19 /// WBGene00013747	defective SPErmatogenesis /// locus:spe-19
186758_at	1.15085	0.37057	Y39A3CR.5	WBGene00021445 /// Y39A3CR.5	status:Confirmed /// hypothetical protein
174102_at	1.15061	0.083525	---	---	---
188221_at	1.15026	0.082181	F47G6.4	spe-15 /// WBGene00004969	defective SPErmatogenesis /// locus:spe-15
176884_at	1.15025	0.078268	ZK616.1	WBGene00022771 /// ZK616.1	status:Partially_confirmed /// hypothetical protein
188268_at	1.15002	0.33067	C06A8.4	skr-17 /// WBGene00004823	SKp1 Related (ubiquitin ligase complex component) /// locus:skr-17
193339_s_at	1.14984	0.038911	R05H5.4	R05H5.4 /// WBGene00011039	hypothetical protein /// tyrosine-protein kinase (FES/FPS subfamily)
189788_at	1.14975	0.02681	F46H6.2	dgk-2	DiacylGlycerol Kinase
189912_at	1.14975	0.003346	ZK354.8	WBGene00022709 /// ZK354.8	protein phosphatase /// hypothetical protein
174234_at	1.1495	0.09238	---	Y32B12C.1	Hypothetical protein (Y32B12C.1)
177462_at	1.14907	0.090564	T19C4.1	T19C4.1 /// WBGene00011838	hypothetical protein /// status:Partially_confirmed
184728_at	1.14902	0.15506	F45E12.1	scpl-2 /// WBGene00018474	SCP(Small C-terminal domain Phosphatase)-Like phosphatase /// locus:scpl-2
191812_s_at	1.14898	0.001942	VF11C1L.1	ppk-3 /// WBGene00004089	PIP Kinase /// locus:ppk-3
179835_at	1.14879	0.069826	F47B10.4	F47B10.4 /// WBGene00009815	hypothetical protein /// status:Predicted
173423_at	1.14877	0.21348	K11E8.1	unc-43	UNCoordinated
193444_at	1.14869	0.017289	T26E4.14	srsx-38 /// WBGene00012054	Serpentine Receptor, class SX /// locus:srsx-38
191368_s_at	1.14864	0.15342	T10G3.5	eea-1	EEA1 (Early Endosome Antigen, Rab effector) homolog
175903_s_at	1.14848	0.019871	F54A3.6 /// Y73B3A.20	F54A3.6 /// WBGene00018785 /// WBGene00022221 /// Y73B3A.20	hypothetical protein /// status:Partially_confirmed /// status:Confirmed /// hypothetical protein
171847_s_at	1.14843	0.18529	W01F3.3	mlt-11	MoLTing defective
194088_at	1.14837	0.048933	ZC247.3	lin-11 /// WBGene00003000	abnormal cell LINeage /// locus:lin-11
175189_at	1.14819	0.11837	C43C3.3	dyf-8 /// WBGene00001124	abnormal DYe Filling /// locus:dyf-8
186214_at	1.14814	0.24675	Y41G9A.5	Y41G9A.5	hypothetical protein
175970_at	1.14793	0.32985	Y105E8A.19	WBGene00013677 /// Y105E8A.19	status:Confirmed /// hypothetical protein
174388_at	1.14785	0.14983	F47B7.2	F47B7.2	hypothetical protein
191521_s_at	1.14777	0.001978	F26A3.4	F26A3.4 /// WBGene00009142	hypothetical protein /// protein-tyrosine phosphatase
174157_at	1.14757	0.090267	K10G6.3	sea-2 /// WBGene00004751	Signal Element on Autosome /// locus:sea-2
193859_at	1.14754	0.070085	ZK617.3	spe-17 /// WBGene00004971	defective SPErmatogenesis /// locus:spe-17
183317_at	1.14752	0.40377	R09B5.1	fbxa-195 /// WBGene00019976	F-box A protein /// locus:fbxa-195
182073_s_at	1.14746	0.20723	H16D19.3 /// T07D10.3	H16D19.3 /// T07D10.3 /// WBGene00010401 /// WBGene00011583	hypothetical protein /// hypothetical protein /// status:Predicted /// zinc finger protein
179094_s_at	1.14719	0.099998	T16G1.4	T16G1.4 /// WBGene00011798	hypothetical protein /// status:Partially_confirmed
189448_s_at	1.14713	0.022329	F59A7.7 /// F59A7.9	F59A7.7 /// F59A7.9 /// WBGene00019094 /// WBGene00019096	hypothetical protein /// hypothetical protein /// status:Predicted /// cysteine sythase
185567_at	1.14709	0.089462	B0344.2	WBGene00006955 /// wrt-9	locus:wrt-9 /// WaRThog (hedgehog-like family)
179734_at	1.14693	0.036711	F19C7.6	F19C7.6 /// WBGene00017596	hypothetical protein /// status:Partially_confirmed
178071_at	1.14688	0.030496	F56D5.2	F56D5.2 /// WBGene00010147	hypothetical protein /// status:Partially_confirmed
183173_at	1.14665	0.11265	R09H10.2	R09H10.2 /// WBGene00011180	hypothetical protein /// status:Partially_confirmed
185201_s_at	1.14648	0.045818	Y116A8C.4	WBGene00013785 /// Y116A8C.4	status:Partially_confirmed /// hypothetical protein
186304_at	1.14633	0.015522	F18F11.1	F18F11.1 /// WBGene00017574	hypothetical protein /// status:Confirmed
184718_at	1.14603	0.044947	F26F12.2	F26F12.2 /// WBGene00017833	hypothetical protein /// status:Confirmed
182368_at	1.14599	0.18503	C30G4.2	C30G4.2 /// WBGene00016268	hypothetical protein /// status:Partially_confirmed
193723_s_at	1.14528	0.009338	R03E9.1	mdl-1 /// WBGene00003163	MAD-Like /// locus:mdl-1
181306_at	1.14513	0.1047	C41G6.11	sri-24 /// WBGene00005536	Serpentine Receptor, class I /// locus:sri-24
191800_at	1.14492	0.14704	F01E11.1	ugt-57 /// WBGene00017154	UDP-GlucuronosylTransferase /// locus:ugt-57
174331_at	1.14492	0.089796	C41G11.3	rgs-6 /// WBGene00004349	Regulator of G protein Signaling /// locus:rgs-6
172557_x_at	1.1449	0.12667	---	---	---
173293_at	1.1446	0.11762	---	---	---
174254_at	1.14454	0.02433	M03F4.6	M03F4.6 /// WBGene00019759	hypothetical protein /// status:Confirmed
177147_at	1.14446	0.034328	AC3.10	spe-10 /// WBGene00004964	defective SPErmatogenesis /// locus:spe-10
185653_at	1.14442	0.11493	C37H5.11	cwp-2 /// WBGene00000860	Coexpressed With Polycystins /// locus:cwp-2
174040_s_at	1.14433	0.033549	F49E8.5	dif-1 /// WBGene00000996	DIFferentiation abnormal /// locus:dif-1
191604_at	1.14419	0.24957	W03D2.10	str-122 /// WBGene00006173	Seven TM Receptor /// locus:str-122
176746_s_at	1.14418	0.017205	R05D3.9	R05D3.9 /// WBGene00019882	hypothetical protein /// status:Partially_confirmed
193038_at	1.14406	0.020327	T15B12.2	T15B12.2 /// WBGene00020531	hypothetical protein /// Protein kinase/Aldehyde dehydrogenase
185244_at	1.14406	0.22136	Y51A2D.12	srg-34 /// WBGene00005191	Serpentine Receptor, class G (gamma) /// locus:srg-34
175769_s_at	1.144	0.22397	Y48E1B.13	csp-1	CaSPase
192353_at	1.14397	0.002796	ZK892.2	nlt-1 /// WBGene00003773	Non-specific Lipid Transfer protein /// locus:nlt-1
191466_at	1.14378	0.10417	C35A5.2	ugt-33 /// WBGene00007946	UDP-GlucuronosylTransferase /// locus:ugt-33
188154_s_at	1.14342	0.4603	F56A11.1	gex-2 /// WBGene00001579	Gut on EXterior /// locus:gex-2
193599_at	1.14333	0.24419	F28D1.4	thn-3 /// WBGene00009214	THaumatiN family /// locus:thn-3
176117_at	1.14308	0.23128	T01B6.1	T01B6.1 /// WBGene00020134	hypothetical protein /// status:Partially_confirmed
173271_s_at	1.14308	0.25337	C44H4.2	sym-5 /// WBGene00006370	SYnthetic lethal with Mec /// locus:sym-5
188515_s_at	1.14307	0.047422	R151.7	R151.7	hypothetical protein
192976_at	1.14301	0.023629	C06A1.3	C06A1.3 /// WBGene00007354	hypothetical protein /// serine/threonine protein phosphatase
176967_at	1.14296	0.08832	Y48G9A.3	WBGene00021697 /// Y48G9A.3	locus:gcn-1 /// hypothetical protein
177211_at	1.14265	0.045997	Y45G12B.2	Y45G12B.2	hypothetical protein
185977_s_at	1.14258	0.028668	C02B10.2	C02B10.2 /// WBGene00015327	hypothetical protein /// status:Confirmed
173939_at	1.1423	0.32737	F09B9.3	erd-2 /// WBGene00001331	ERD (yeast endoplasmic reticulum retention defective) related /// locus:erd-2
185495_at	1.14214	0.012847	C25E10.4	C25E10.4 /// WBGene00016094	hypothetical protein /// status:Partially_confirmed
192743_s_at	1.14177	0.10194	C10H11.9	let-502 /// WBGene00002694	LEThal /// locus:let-502
180432_at	1.14174	0.15803	Y48A6C.4	WBGene00012977 /// Y48A6C.4	status:Partially_confirmed /// hypothetical protein
192829_at	1.14164	0.011703	F23B12.1	F23B12.1 /// WBGene00009079	hypothetical protein /// serine/threonine protein phosphatase
190715_at	1.14164	0.1338	T21G5.1	T21G5.1 /// WBGene00020659	hypothetical protein /// tyrosine-protein kinase
AFFX-r2-Ec-bioB-3_at	1.14161	0.19285	---	---	---
184983_at	1.14156	0.004405	Y73C8B.1	WBGene00022258 /// Y73C8B.1	status:Partially_confirmed /// hypothetical protein
174616_at	1.14153	0.23865	---	---	---
194087_s_at	1.14153	0.045095	W09C5.5	dkf-1 /// WBGene00012352	D Kinase Family /// locus:dkf-1
191711_at	1.14137	0.18691	F36H1.3	F36H1.3 /// WBGene00009492	hypothetical protein /// protein-tyrosine phosphatase
193539_at	1.14128	0.23599	B0024.12	gna-1 /// WBGene00001646	Glucosamine phosphate N-Acetyl transferase /// locus:gna-1
174133_at	1.14121	0.12837	Y18H1A.1	WBGene00021207 /// Y18H1A.1	status:Confirmed /// hypothetical protein
181052_at	1.14093	0.050229	F26G1.4	ttm-2 /// WBGene00017840	Toxin-regulated Target of p38MAPK /// locus:ttm-2
185711_at	1.14091	0.016296	T15B7.14	T15B7.14 /// WBGene00020526	hypothetical protein /// status:Partially_confirmed
174504_at	1.14063	0.489	F28B3.1	F28B3.1 /// WBGene00017882	hypothetical protein /// status:Partially_confirmed
181979_at	1.14054	0.023697	C47D12.2	C47D12.2 /// WBGene00008136	hypothetical protein /// status:Confirmed
184222_s_at	1.14045	0.15194	W03F11.3	dct-9 /// WBGene00021006	DAF-16/FOXO Controlled, germline Tumor affecting /// locus:dct-9
181912_at	1.14043	0.37074	F58H10.1	F58H10.1 /// WBGene00010291	hypothetical protein /// status:Confirmed
179147_at	1.14036	0.48962	T22C1.5	T22C1.5 /// WBGene00011916	hypothetical protein /// status:Partially_confirmed
194130_s_at	1.14034	0.16656	C01H6.5	nhr-23	Nuclear Hormone Receptor family
181692_at	1.14023	0.1106	F44F4.10	F44F4.10 /// WBGene00009705	hypothetical protein /// status:Partially_confirmed
189790_s_at	1.14018	0.10394	T10H10.1	hum-6 /// WBGene00002039	Heavy chain, Unconventional Myosin /// locus:hum-6
177188_at	1.14009	0.013598	Y73B6BL.26	lgc-10 /// WBGene00022247	Ligand-Gated ion Channel /// locus:lgc-10
179317_at	1.14008	0.32567	F18E2.4	srt-43 /// WBGene00008937	Serpentine Receptor, class T /// locus:srt-43
186543_s_at	1.13995	0.19877	T27C5.5 /// Y102A5C.31	srh-131 /// srh-132 /// WBGene00005348 /// WBGene00005349	Serpentine Receptor, class H /// Serpentine Receptor, class H /// locus:srh-131 /// locus:srh-132
188386_at	1.13976	0.21657	W01A8.3	cutl-6 /// WBGene00012165	CUTiclin-Like /// locus:cutl-6
177979_s_at	1.13955	0.11876	C36E8.3	pxd-1 /// WBGene00007982	PleXin Domain containing /// locus:pxd-1
175360_at	1.13951	0.090636	T26C11.5	ceh-41 /// WBGene00000462	Homeobox /// locus:ceh-41
184691_at	1.13938	0.40599	Y39A3B.3	WBGene00021438 /// Y39A3B.3	status:Predicted /// hypothetical protein
184504_s_at	1.13935	0.057064	Y73C8B.3	WBGene00022260 /// Y73C8B.3	status:Confirmed /// hypothetical protein
180032_at	1.13928	0.093162	D2092.4	D2092.4 /// WBGene00017065	hypothetical protein /// status:Confirmed
177889_at	1.1392	0.27891	D1086.10	D1086.10	hypothetical protein
174769_at	1.13918	0.46978	F18C5.10	F18C5.10 /// WBGene00017563	hypothetical protein /// status:Confirmed
182688_at	1.1388	0.053377	Y39A1A.2	WBGene00012642 /// Y39A1A.2	status:Partially_confirmed /// hypothetical protein
177050_at	1.13816	0.33064	Y42H9AR.4	WBGene00021539 /// Y42H9AR.4	status:Partially_confirmed /// hypothetical protein
187091_at	1.13794	0.075967	Y105C5B.18	WBGene00013657 /// Y105C5B.18	status:Confirmed /// hypothetical protein
182254_s_at	1.13791	0.006488	T05C1.4	T05C1.4	hypothetical protein
184568_at	1.13779	0.44517	Y48G10A.2	WBGene00013019 /// Y48G10A.2	status:Partially_confirmed /// hypothetical protein
173186_s_at	1.13769	0.15144	Y38F1A.2	WBGene00012606 /// Y38F1A.2	Zinc finger, C3HC4 type (RING finger) /// hypothetical protein
183336_at	1.13768	0.42368	F59B1.7	srx-41 /// WBGene00005932	Serpentine Receptor, class X /// locus:srx-41
189703_at	1.13753	0.17869	T04H1.2	T04H1.2 /// WBGene00011449	hypothetical protein /// GTP-binding protein
176918_at	1.13751	0.14154	M7.8	M7.8 /// WBGene00010884	hypothetical protein /// status:Partially_confirmed
188007_at	1.13736	0.00258	F54D7.4	WBGene00006984 /// zig-7	locus:zig-7 /// 2 (Zwei) IG-domain protein
182096_at	1.13734	0.092316	C01G8.4	dnj-4 /// WBGene00001022	DNaJ domain (prokaryotic heat shock protein) /// locus:dnj-4
176266_s_at	1.13712	0.056253	Y71H2AM.11	WBGene00022176 /// Y71H2AM.11	status:Partially_confirmed /// hypothetical protein
173319_s_at	1.13691	0.16729	T19D12.6	T19D12.6 /// WBGene00020581	hypothetical protein /// laminin repeats; EGF-like repeats
182320_at	1.13673	0.31987	F18G5.2	pes-8 /// WBGene00003981	Patterned Expression Site /// locus:pes-8
173542_at	1.13657	0.044469	F47D12.9	F47D12.9	hypothetical protein
193726_at	1.1364	0.004842	T13F2.1	fat-4 /// WBGene00001396	FATty acid desaturase /// locus:fat-4
182846_s_at	1.13634	0.035432	M01H9.3	M01H9.3	hypothetical protein
177939_at	1.13628	0.11287	T05F1.5	T05F1.5 /// WBGene00011491	hypothetical protein /// status:Confirmed
186237_at	1.13619	0.071595	C08F11.14	---	---
180058_s_at	1.13607	0.001063	C16H3.3	C16H3.3	hypothetical protein
181905_at	1.13587	0.11999	C48C5.3	C48C5.3 /// WBGene00016748	hypothetical protein /// status:Partially_confirmed
193478_s_at	1.13573	0.12264	C56G7.1	mlc-4 /// WBGene00003372	Myosin Light Chain /// locus:mlc-4
183945_at	1.13571	0.18776	C25H3.11	C25H3.11 /// WBGene00016120	hypothetical protein /// status:Partially_confirmed
173066_at	1.13546	0.34333	C25G4.10 /// T04A11.3	fibronectin /// WBGene00011418	hypothetical protein /// fibronectin
184327_at	1.13544	0.23442	Y73F8A.31	---	---
175098_s_at	1.13532	0.10051	C56C10.11	C56C10.11 /// WBGene00016967	hypothetical protein /// DNAJ protein
174086_s_at	1.13518	0.43258	T21D12.9	T21D12.9	hypothetical protein
178296_at	1.13507	0.4082	F54B3.2	F54B3.2 /// WBGene00010014	hypothetical protein /// status:Partially_confirmed
176439_at	1.13499	0.061451	F54H12.8	F54H12.8 /// WBGene00045247	hypothetical protein /// status:Partially_confirmed
191230_at	1.13491	0.29627	F09G2.7	srh-83 /// WBGene00005304	Serpentine Receptor, class H /// locus:srh-83
182080_at	1.13483	0.026785	T22F7.5	T22F7.5 /// WBGene00020704	hypothetical protein /// status:Partially_confirmed
178654_s_at	1.13474	0.017099	W04A8.4	W04A8.4 /// WBGene00012239	hypothetical protein /// status:Confirmed
178660_at	1.13468	0.072333	C47E8.1	C47E8.1 /// WBGene00008141	hypothetical protein /// status:Partially_confirmed
178970_at	1.13451	0.34178	T02E1.2	T02E1.2 /// WBGene00011375	hypothetical protein /// status:Confirmed
189072_at	1.13448	0.077919	M01D7.4	tag-96 /// WBGene00006461	Temporarily Assigned Gene name /// locus:tag-96
184749_at	1.13412	0.048763	F35F11.2	F35F11.2 /// WBGene00018065	hypothetical protein /// status:Partially_confirmed
184306_at	1.13409	0.047733	Y51H4A.15	Y51H4A.15	hypothetical protein
191082_at	1.13408	0.069477	F26E4.12	F26E4.12 /// WBGene00009165	hypothetical protein /// glutathione peroxidase
180238_at	1.13404	0.014403	C09E7.5	C09E7.5 /// WBGene00015639	hypothetical protein /// status:Partially_confirmed
193897_at	1.13394	0.35345	R12G8.1	R12G8.1 /// WBGene00011254	hypothetical protein /// Phorbol esters / diacylglycerol binding domain (2 domains)
188839_at	1.13379	0.066254	F12A10.4	Neprilysin /// WBGene00017393	hypothetical protein /// Neprilysin
180080_at	1.13368	0.014403	W05F2.7	W05F2.7 /// WBGene00021039	hypothetical protein /// status:Partially_confirmed
193964_at	1.13366	0.17826	T25B9.4	T25B9.4 /// WBGene00012010	hypothetical protein /// Src homology domain 2, protein tyrosine kinase (ABL subfamily)
178912_at	1.13362	0.1505	F35G2.5	F35G2.5	hypothetical protein
192535_s_at	1.13358	0.11359	T19D12.6	T19D12.6 /// WBGene00020581	hypothetical protein /// laminin repeats; EGF-like repeats
182795_at	1.13339	0.084696	K08H10.9	K08H10.9 /// WBGene00010699	hypothetical protein /// status:Confirmed
185236_at	1.1331	0.14993	Y113G7B.1	fbxa-116	F-box A protein
185742_at	1.1331	0.20225	Y46H3B.1	clec-205 /// WBGene00021602	C-type LECtin /// locus:clec-205
177316_at	1.13296	0.028944	R52.1	sdz-28 /// WBGene00020073	SKN-1 Dependent Zygotic transcript /// locus:sdz-28
177496_at	1.13267	0.5	D1086.1	D1086.1 /// WBGene00008388	hypothetical protein /// status:Confirmed
172231_x_at	1.13251	0.060762	C25D7.14 /// C25D7.2	---	---
172606_x_at	1.1324	0.019037	Y59E9AL.6	WBGene00021996 /// Y59E9AL.6	status:Confirmed /// hypothetical protein
193058_at	1.13232	0.092953	C29E6.1	let-653	LEThal
172987_s_at	1.13227	0.47091	Y22D7AL.7	WBGene00021246 /// Y22D7AL.7	status:Partially_confirmed /// hypothetical protein
186810_at	1.13227	0.45538	F43D9.2	rab-33 /// WBGene00004283	RAB family /// locus:rab-33
185641_at	1.13215	0.1318	Y17G9A.4	WBGene00021197 /// Y17G9A.4	status:Partially_confirmed /// hypothetical protein
172827_x_at	1.13201	0.007066	---	---	---
188140_at	1.13196	0.35785	AH6.11	sra-7 /// WBGene00005033	Serpentine Receptor, class A (alpha) /// locus:sra-7
181533_at	1.13186	0.25646	F07C4.9	clec-46 /// WBGene00017202	C-type LECtin /// locus:clec-46
178326_at	1.13179	0.33063	Y60A9.1	WBGene00013368 /// Y60A9.1	status:Predicted /// hypothetical protein
192694_s_at	1.13168	0.03495	R08A2.2 /// R08C7.8	R08A2.2 /// R08C7.8 /// WBGene00011133 /// WBGene00019951	hypothetical protein /// hypothetical protein /// serine/threonine protein phosphatase /// serine/threonine protein phosphatase
181923_at	1.13159	0.16623	AH6.2	sfxn-1.1 /// WBGene00007080	SideroFleXiN (mitochondrial iron transporter) /// locus:sfxn-1.1
177633_at	1.13158	0.13533	C33D3.4	C33D3.4 /// WBGene00007895	hypothetical protein /// status:Predicted
187837_at	1.13154	0.001248	F26D12.1	fkh-7	ForKHead transcription factor family
175703_s_at	1.13137	0.21223	F56D1.4	clr-1	CLeaR
189800_s_at	1.13137	0.11492	K08E5.3	mua-3	MUscle Attachment abnormal
175936_at	1.13135	0.30903	---	---	---
187140_s_at	1.13132	0.31994	C09B9.3	C09B9.3 /// WBGene00015628	hypothetical protein /// status:Partially_confirmed
178649_s_at	1.13131	0.18503	F41D3.11 /// F41D3.7	F41D3.11 /// F41D3.7 /// WBGene00009612 /// WBGene00009616	hypothetical protein /// hypothetical protein /// status:Predicted /// status:Predicted
187868_s_at	1.13121	0.25097	C06E1.4	glr-1 /// WBGene00001612	GLutamate Receptor family (AMPA) /// locus:glr-1
183709_at	1.13113	0.083596	T23G11.7	T23G11.7	hypothetical protein
182238_s_at	1.13089	0.3213	Y59A8A.1	csn-1 /// WBGene00000813	COP-9 SigNalosome subunit /// locus:csn-1
183615_at	1.13083	0.19334	W02D3.4	W02D3.4 /// WBGene00020933	hypothetical protein /// status:Partially_confirmed
177062_at	1.13056	0.15288	F32A6.3 /// Y34B4A.11	vps-41 /// WBGene00045435 /// Y34B4A.11	related to yeast Vacuolar Protein Sorting factor /// status:Confirmed /// hypothetical protein
182714_at	1.13048	0.44975	F37C4.7	F37C4.7 /// WBGene00018147	hypothetical protein /// status:Predicted
185015_at	1.13019	0.33452	C33E10.2	fbxa-120 /// WBGene00016346	F-box A protein /// locus:fbxa-120
174429_at	1.1301	0.3785	Y69A2AR.16	WBGene00022087 /// Y69A2AR.16	status:Partially_confirmed /// hypothetical protein
187680_s_at	1.13003	0.040922	F56A8.7	unc-64	UNCoordinated
189660_at	1.1299	0.084931	F59D6.3	F59D6.3 /// WBGene00019105	hypothetical protein /// aspartyl protease
187124_s_at	1.12974	0.23417	K01A2.11	cbn-1	Calcium BiNding protein homolog
180457_at	1.12955	0.064636	K04A8.6	dre-1 /// WBGene00001089	Daf-12, REdundant with /// locus:dre-1
185972_at	1.1294	0.2839	H42K12.3	H42K12.3 /// WBGene00019272	hypothetical protein /// status:Confirmed
182793_at	1.12935	0.21029	C11G10.1	C11G10.1 /// WBGene00007525	hypothetical protein /// status:Confirmed
189061_at	1.12932	0.32783	F26A1.4	F26A1.4 /// WBGene00017803	hypothetical protein /// Casein kinase
179635_at	1.12925	0.001394	F07A5.4	F07A5.4 /// WBGene00008543	hypothetical protein /// status:Partially_confirmed
177870_at	1.12924	0.35093	C02F4.4	C02F4.4 /// WBGene00007264	hypothetical protein /// status:Confirmed
186414_s_at	1.12917	0.14365	F45E12.5	F45E12.5	hypothetical protein
191494_s_at	1.12913	0.04627	ZK1320.9	WBGene00014258 /// ZK1320.9	acetate utilisation protein /// hypothetical protein
189238_at	1.12913	0.14502	W03F8.2	W03F8.2 /// WBGene00020992	hypothetical protein /// protein kinase
172825_x_at	1.12909	0.017505	F45F2.2	his-39 /// WBGene00001913	HIStone /// locus:his-39
187301_s_at	1.12906	0.16017	Y116F11B.14 /// Y71G12B.22	WBGene00013829 /// WBGene00022157 /// Y116F11B.14 /// Y71G12B.22	status:Partially_confirmed /// status:Confirmed /// hypothetical protein /// hypothetical protein
181526_at	1.129	0.099201	Y43F8A.2	WBGene00012809 /// Y43F8A.2	status:Confirmed /// hypothetical protein
182803_at	1.12891	0.086034	F27C1.3	F27C1.3 /// WBGene00017853	hypothetical protein /// status:Confirmed
189969_at	1.12872	0.051748	T26E3.9	sra-25 /// WBGene00005051	Serpentine Receptor, class A (alpha) /// locus:sra-25
177399_at	1.12871	0.061227	C11H1.7	C11H1.7 /// WBGene00007531	hypothetical protein /// status:Partially_confirmed
189340_at	1.12869	0.23463	EEED8.5	mog-5 /// WBGene00003393	Masculinisation Of Germline /// locus:mog-5
171894_x_at	1.12863	0.30451	T08H4.1	rhgf-2 /// WBGene00006476	RHo Guanine nucleotide exchange Factor /// locus:rhgf-2
187361_s_at	1.12859	0.004082	F32A5.6	prx-13 /// WBGene00004198	PeRoXisome assembly factor /// locus:prx-13
190816_at	1.12825	0.12927	B0222.4	tag-38 /// WBGene00006418	Temporarily Assigned Gene name /// locus:tag-38
187343_at	1.12824	0.13878	C01C4.2	C01C4.2 /// WBGene00015292	hypothetical protein /// status:Partially_confirmed
186140_at	1.12821	0.35256	B0432.11	B0432.11 /// WBGene00015192	hypothetical protein /// status:Partially_confirmed
182658_at	1.12817	0.02398	T04H1.10	---	---
175448_at	1.12815	0.067592	Y57G11C.36	WBGene00013325 /// Y57G11C.36	status:Confirmed /// hypothetical protein
186422_at	1.12808	0.3709	F59H6.12	btb-4 /// WBGene00019142	BTB (Broad/complex/Tramtrack/Bric a brac) domain protein /// locus:btb-4
184823_at	1.12799	0.13653	C01B10.4	C01B10.4 /// WBGene00015279	hypothetical protein /// status:Partially_confirmed
177892_at	1.12781	0.5	F46B3.8	F46B3.8 /// WBGene00009761	hypothetical protein /// status:Predicted
176243_at	1.12771	0.38725	Y105E8B.8	ero-1	Endoplasmic Reticulum Oxidase
188926_s_at	1.12767	0.063623	Y49E10.20	WBGene00013039 /// Y49E10.20	CD36 family /// hypothetical protein
176775_at	1.12744	0.25994	K02G10.3	K02G10.3 /// WBGene00019345	hypothetical protein /// status:Confirmed
191256_at	1.12743	0.41564	D1065.5	srh-211 /// WBGene00005421	Serpentine Receptor, class H /// locus:srh-211
182529_at	1.12734	0.000908	C31E10.5	C31E10.5 /// WBGene00007846	hypothetical protein /// status:Partially_confirmed
172949_s_at	1.12727	0.086595	C56C10.13	dnj-8	DNaJ domain (prokaryotic heat shock protein)
179166_s_at	1.1272	0.11694	R148.5	R148.5	hypothetical protein
180337_at	1.12714	0.34487	Y54E5A.2	WBGene00013198 /// Y54E5A.2	status:Partially_confirmed /// hypothetical protein
194214_x_at	1.1271	0.063286	T06E4.1	hcp-2 /// WBGene00001830	HoloCentric chromosome binding Protein /// locus:hcp-2
178646_at	1.12704	0.032265	F33E2.4	F33E2.4 /// WBGene00009360	hypothetical protein /// status:Confirmed
175368_at	1.127	0.10998	F17E5.2	F17E5.2 /// WBGene00008924	hypothetical protein /// ADP/ATP carrier protein
176322_at	1.12698	0.36214	---	---	---
190586_at	1.12696	0.29134	K04E7.3	nas-33 /// WBGene00003551	Nematode AStacin protease /// locus:nas-33
188011_at	1.12691	0.44534	Y47G6A.21	WBGene00021646 /// Y47G6A.21	status:Confirmed /// hypothetical protein
192345_s_at	1.12665	0.21331	F32H5.1	F32H5.1 /// WBGene00009347	hypothetical protein /// cathepsin B like cysteine protease
172366_x_at	1.12661	0.5	C17B7.9	C17B7.9 /// WBGene00015883	hypothetical protein /// status:Predicted
184955_at	1.12651	0.42668	F35F10.7	F35F10.7 /// WBGene00018057	hypothetical protein /// status:Partially_confirmed
182697_s_at	1.12645	0.062267	F53C11.5	F53C11.5	hypothetical protein
189381_at	1.12642	0.26474	T27A8.1	carboxypeptidase /// WBGene00012073	hypothetical protein /// carboxypeptidase
178216_at	1.12633	0.12016	F38H4.5	F38H4.5 /// WBGene00009549	hypothetical protein /// status:Partially_confirmed
173554_at	1.12626	0.23669	Y79H2A.6	arx-3 /// WBGene00000201	ARp2/3 compleX component /// locus:arx-3
185206_s_at	1.12613	0.41618	Y55D9A.2	Y55D9A.2	hypothetical protein
186985_at	1.12612	0.28716	F59C6.8	F59C6.8 /// WBGene00010327	hypothetical protein /// status:Partially_confirmed
193988_at	1.12609	0.16956	D2085.4	D2085.4 /// WBGene00008429	hypothetical protein /// similarity with a human hypothetical protein (PIR Acc. No. A38919)
185123_at	1.12595	0.16249	F36F12.5	clec-207 /// WBGene00018096	C-type LECtin /// locus:clec-207
189555_at	1.12595	0.42668	C17E4.6	C17E4.6 /// WBGene00007645	hypothetical protein /// YL-1 protein like
171769_x_at	1.12589	0.14188	F23F12.12	F23F12.12 /// WBGene00017756	hypothetical protein /// status:Confirmed
172019_x_at	1.12585	0.38095	ZK637.7	lin-9	abnormal cell LINeage
190253_at	1.12566	0.000738	C33G8.10	nhr-162 /// WBGene00016367	Nuclear Hormone Receptor family /// locus:nhr-162
176564_at	1.12564	0.1388	Y71G12B.6	WBGene00022146 /// Y71G12B.6	status:Confirmed /// hypothetical protein
191921_s_at	1.12563	0.011274	F35H8.6	ugt-58 /// WBGene00009450	UDP-GlucuronosylTransferase /// locus:ugt-58
192388_at	1.12552	0.074749	K08C7.1	K08C7.1 /// WBGene00010646	hypothetical protein /// sodium/phosphate transport protein
182574_at	1.12549	0.2309	Y54E5B.2	WBGene00013204 /// Y54E5B.2	status:Partially_confirmed /// hypothetical protein
173099_at	1.12533	0.33962	Y37F4.5	WBGene00021386 /// Y37F4.5	status:Partially_confirmed /// hypothetical protein
175254_at	1.12527	0.10752	C05D10.3	WBGene00015479 /// wht-1	locus:wht-1 /// WHiTe (Drosophila) related ABC transporte
178592_at	1.12516	0.25054	K06B4.3	K06B4.3 /// WBGene00010598	hypothetical protein /// status:Predicted
181945_s_at	1.12511	0.15007	F39E9.12	btb-18 /// WBGene00018201	BTB (Broad/complex/Tramtrack/Bric a brac) domain protein /// locus:btb-18
173502_s_at	1.12504	0.062722	C03E10.4	gly-20 /// WBGene00001645	GLYcosylation related /// locus:gly-20
186041_at	1.12501	0.060919	T25G12.3	T25G12.3 /// WBGene00020811	hypothetical protein /// status:Partially_confirmed
181592_s_at	1.12495	0.065901	C26E6.5	fsn-1 /// WBGene00001499	F-box SyNaptic Protein /// locus:fsn-1
175968_at	1.12493	0.22222	Y5H2B.1	WBGene00021164 /// Y5H2B.1	status:Partially_confirmed /// hypothetical protein
182876_s_at	1.12472	0.013809	T19B10.6	T19B10.6 /// WBGene00011834	hypothetical protein /// status:Confirmed
182812_at	1.12465	0.26119	F22F4.1	F22F4.1 /// WBGene00017716	hypothetical protein /// status:Confirmed
182210_at	1.12463	0.10815	K03H1.12	K03H1.12 /// WBGene00010547	hypothetical protein /// status:Confirmed
189057_at	1.1246	0.39703	F26G5.2	str-208 /// WBGene00006241	Seven TM Receptor /// locus:str-208
179600_at	1.12441	0.35851	C38C6.3	C38C6.3 /// WBGene00007996	hypothetical protein /// status:Confirmed
192134_at	1.12441	0.001245	T05A10.4 /// T05A10.5	T05A10.4 /// WBGene00011461	hypothetical protein /// SCP-like extracellular Proteins
173113_at	1.1242	0.01086	T21H3.3	cmd-1 /// WBGene00000552	CalModulin /// locus:cmd-1
192557_s_at	1.12418	0.026809	T01C3.10	nmr-2 /// WBGene00003775	NMDA class glutamate receptor /// locus:nmr-2
183781_at	1.12406	0.25129	C47E12.9	C47E12.9 /// WBGene00008152	hypothetical protein /// status:Partially_confirmed
185342_at	1.12403	0.26668	C24H12.8	C24H12.8 /// WBGene00016077	hypothetical protein /// status:Partially_confirmed
192634_at	1.12402	0.062337	ZC410.1	nhr-11	Nuclear Hormone Receptor family
187071_at	1.12359	0.036414	F59B2.5	F59B2.5	hypothetical protein
190819_s_at	1.1235	0.23469	T25G12.5	acdh-7 /// WBGene00020812	Acyl CoA DeHydrogenase /// locus:acdh-7
172416_x_at	1.12343	0.39348	B0391.10	B0391.10 /// WBGene00007165	hypothetical protein /// status:Confirmed
190527_at	1.12331	0.24858	---	H36L18.1 /// WBGene00010423	hypothetical protein /// matrix metalloprotease
186545_s_at	1.12331	0.048981	Y55F3AM.9	WBGene00021926 /// Y55F3AM.9	status:Confirmed /// hypothetical protein
172236_x_at	1.12321	0.009838	T24F1.5	T24F1.5 /// WBGene00011997	hypothetical protein /// status:Confirmed
181556_at	1.1232	0.25062	W03G1.8	W03G1.8 /// WBGene00021013	hypothetical protein /// status:Predicted
189428_at	1.12298	0.01876	F02E11.1	WBGene00017179 /// wht-4	locus:wht-4 /// WHiTe (Drosophila) related ABC transporte
187984_at	1.12295	0.11333	F39B2.2	uev-1 /// WBGene00006730	Ubiquitin E2 (conjugating enzyme) variant /// locus:uev-1
187118_s_at	1.12288	0.017263	F52E1.13	F52E1.13	hypothetical protein
192467_at	1.12282	0.035395	T01H10.1	lgc-13 /// WBGene00011354	Ligand-Gated ion Channel /// locus:lgc-13
172858_x_at	1.12278	0.46304	C53C11.4	C53C11.4 /// WBGene00016901	hypothetical protein /// S. muris microneme antigen
182481_at	1.12273	0.40592	F35D2.1	F35D2.1 /// WBGene00018039	hypothetical protein /// status:Partially_confirmed
192866_at	1.12271	0.069477	F20D6.6	F20D6.6 /// WBGene00017636	hypothetical protein /// serine/threoninie protein phophatase
193170_at	1.12248	0.27989	B0024.6	gcy-6 /// WBGene00001533	Guanylyl CYclase /// locus:gcy-6
177085_at	1.12242	0.24199	Y55F3BR.2	WBGene00021939 /// Y55F3BR.2	status:Partially_confirmed /// hypothetical protein
173266_at	1.12199	0.26872	Y54E10A.3	WBGene00021826 /// Y54E10A.3	thioredoxin-like protein /// hypothetical protein
185214_at	1.12195	0.024957	Y45F10A.3	WBGene00012866 /// Y45F10A.3	status:Confirmed /// hypothetical protein
193329_at	1.12194	0.032667	F41E6.6	tag-196 /// WBGene00007055	Temporarily Assigned Gene name /// locus:tag-196
174951_at	1.12193	0.058722	C34D10.2	C34D10.2 /// WBGene00016407	hypothetical protein /// Cys(3)His finger protein (D. melanogaster)
183689_at	1.12183	0.27647	C54F6.3	C54F6.3 /// WBGene00016921	hypothetical protein /// status:Confirmed
182999_at	1.12179	0.077674	W06H8.2	W06H8.2 /// WBGene00021066	hypothetical protein /// status:Partially_confirmed
173848_s_at	1.12177	0.095855	C56C10.10	C56C10.10 /// WBGene00016966	hypothetical protein /// TPR domain
181712_at	1.1217	0.12414	C04G2.10	C04G2.10	hypothetical protein
182281_at	1.12164	0.20304	C12D8.12	str-182 /// WBGene00006226	Seven TM Receptor /// locus:str-182
194075_s_at	1.12164	0.014648	ZK328.1	cyk-3	CYtoKinesis defect
175280_at	1.12151	7.3e-05	ZC247.3	lin-11 /// WBGene00003000	abnormal cell LINeage /// locus:lin-11
191265_at	1.12142	0.22963	W02H5.6	srh-271 /// WBGene00005477	Serpentine Receptor, class H /// locus:srh-271
174136_s_at	1.12125	0.039821	K10D2.2	pup-2 /// WBGene00019628	Poly(U) Polymerase /// locus:pup-2
177962_at	1.12121	0.15927	K04G2.4	K04G2.4 /// WBGene00010563	hypothetical protein /// status:Confirmed
188715_at	1.12115	0.18597	Y45F3A.2	rab-30 /// WBGene00004282	RAB family /// locus:rab-30
178189_at	1.12101	0.37635	F28C6.5	F28C6.5 /// WBGene00009205	hypothetical protein /// status:Confirmed
193340_at	1.12094	0.19623	B0025.1	vps-34	related to yeast Vacuolar Protein Sorting factor
177964_at	1.12088	0.085385	F37A8.1	F37A8.1 /// WBGene00009501	hypothetical protein /// status:Partially_confirmed
180914_at	1.12077	0.02581	C33A12.2	nlp-35 /// WBGene00007881	Neuropeptide-Like Protein /// locus:nlp-35
187486_at	1.12071	0.37625	F40H6.4	tbx-11 /// WBGene00006547	T BoX family /// locus:tbx-11
181694_at	1.12068	0.27373	F48D6.4	F48D6.4	hypothetical protein
189300_at	1.12061	0.17749	T02B5.1	carboxylesterase /// WBGene00011362	hypothetical protein /// carboxylesterase
190910_at	1.12058	0.17894	E02H1.1	E02H1.1 /// WBGene00008455	hypothetical protein /// rRNA methyltransferase
174743_s_at	1.12053	0.39868	ZK1248.10	tbc-2 /// WBGene00022880	TBC (Tre-2/Bub2/Cdc16) domain family /// locus:tbc-2
173095_at	1.12052	0.4281	T23B12.4	T23B12.4 /// WBGene00020719	hypothetical protein /// status:Partially_confirmed
183220_at	1.12043	0.44936	C53A3.1	C53A3.1 /// WBGene00016891	hypothetical protein /// status:Partially_confirmed
181816_s_at	1.12035	0.024651	C18E9.10	C18E9.10 /// WBGene00007690	hypothetical protein /// status:Partially_confirmed
174607_at	1.12032	0.008527	Y75B7AL.1	glb-33 /// WBGene00022284	GLoBin /// locus:glb-33
177521_at	1.1203	0.41925	F58E6.6	F58E6.6 /// WBGene00010255	hypothetical protein /// status:Partially_confirmed
176864_at	1.11995	0.081763	Y5H2A.1	WBGene00021162 /// Y5H2A.1	status:Partially_confirmed /// hypothetical protein
180931_at	1.11957	0.32894	F44D12.6	F44D12.6 /// WBGene00009683	hypothetical protein /// status:Partially_confirmed
190545_at	1.11952	0.092137	C04G6.1	mpk-2	MAP Kinase
192450_at	1.11949	0.22871	F56D1.6	cex-1 /// WBGene00023407	CalEXcitin /// locus:cex-1
172042_x_at	1.11948	0.16928	T06E4.3	atl-1	ATM(ataxia telangectasia mutated)-Like
181548_at	1.11936	0.41658	T07H3.5	clec-20 /// WBGene00020328	C-type LECtin /// locus:clec-20
183159_at	1.11929	0.34167	F09F9.2	F09F9.2 /// WBGene00017307	hypothetical protein /// status:Confirmed
187988_at	1.11927	0.45155	T20C4.1	srj-9 /// WBGene00005597	Serpentine Receptor, class J /// locus:srj-9
190123_at	1.11921	0.21182	C51E3.3	srsx-28 /// WBGene00008249	Serpentine Receptor, class SX /// locus:srsx-28
193529_at	1.11917	0.012973	F55C5.2	F55C5.2 /// WBGene00010092	hypothetical protein /// glycerophosphoryldiester phophodiesterase like
174804_at	1.11912	0.20253	T07D3.7	alg-2	Argonaute (plant)-Like Gene
192508_s_at	1.11902	0.041392	C01C4.3	C01C4.3	hypothetical protein
181069_at	1.11902	0.24403	T03G6.1	T03G6.1 /// WBGene00020194	hypothetical protein /// status:Confirmed
187283_at	1.11896	0.052189	Y110A2AL.7	WBGene00022444 /// Y110A2AL.7	status:Partially_confirmed /// hypothetical protein
192206_at	1.1187	0.19458	F53B1.8	F53B1.8 /// WBGene00018739	hypothetical protein /// zinc-finger DNA-binding protein
186349_at	1.11867	0.36396	Y51H7C.1	WBGene00021779 /// Y51H7C.1	status:Partially_confirmed /// hypothetical protein
190672_s_at	1.1186	0.11736	E02A10.3	E02A10.3 /// WBGene00008453	hypothetical protein /// calmodulin-like protein
174591_at	1.11859	0.19044	ZK593.5	dnc-1 /// WBGene00001017	DyNactin Complex component /// locus:dnc-1
181164_at	1.11859	0.022548	C37H5.3	C37H5.3	hypothetical protein
190999_at	1.11851	0.070251	T20B3.1	T20B3.1 /// WBGene00011850	hypothetical protein /// Carnitate acyltransferase
178656_at	1.11848	0.098575	F36D1.6	F36D1.6 /// WBGene00009465	hypothetical protein /// status:Partially_confirmed
188327_at	1.1184	0.003002	ZK84.6	ins-6 /// WBGene00002089	INSulin related /// locus:ins-6
176569_s_at	1.11834	0.424	Y97E10AR.4	WBGene00022399 /// Y97E10AR.4	status:Partially_confirmed /// hypothetical protein
174564_at	1.11827	0.4056	---	---	---
176979_at	1.11814	0.43248	Y48G1C.4	WBGene00021677 /// Y48G1C.4	locus:pgs-1 /// hypothetical protein
176881_at	1.11812	0.28604	Y43B11AL.3	---	---
180415_s_at	1.11808	0.22296	B0379.7	B0379.7 /// WBGene00007159	hypothetical protein /// status:Confirmed
193483_at	1.11792	0.033061	C29E6.5	nhr-43 /// WBGene00003633	Nuclear Hormone Receptor family /// locus:nhr-43
192282_at	1.1178	0.18042	R11G11.2	nhr-58	Nuclear Hormone Receptor family
190812_at	1.1177	0.10815	F09C6.9	nhr-116 /// WBGene00003706	Nuclear Hormone Receptor family /// locus:nhr-116
183451_at	1.11766	0.44907	C49C3.13	clec-198 /// WBGene00008203	C-type LECtin /// locus:clec-198
171834_x_at	1.11762	0.41044	ZC8.6	WBGene00022501 /// ZC8.6	status:Partially_confirmed /// hypothetical protein
182483_s_at	1.11761	0.034972	T20F7.1	T20F7.1 /// WBGene00020630	hypothetical protein /// status:Partially_confirmed
192697_at	1.11753	0.18454	C44C10.5	C44C10.5 /// WBGene00008086	hypothetical protein /// chromosome segregation protein like
180769_at	1.11747	0.16604	Y41E3.12	srt-47 /// WBGene00012770	Serpentine Receptor, class T /// locus:srt-47
172631_x_at	1.11726	0.039261	Y25C1A.7	Y25C1A.7	hypothetical protein
177288_s_at	1.11722	0.057404	BE10.1	BE10.1 /// WBGene00007209	hypothetical protein /// status:Partially_confirmed
172155_x_at	1.1172	0.12181	F30A10.7 /// K02F6.1	K02F6.1 /// WBGene00019335	hypothetical protein /// status:Predicted
175991_s_at	1.11719	0.14526	ZK686.3	WBGene00022793 /// ZK686.3	status:Confirmed /// hypothetical protein
187962_at	1.11717	0.013899	K02E2.4	ins-35 /// WBGene00002118	INSulin related /// locus:ins-35
176876_at	1.11716	0.082308	CC8.2	CC8.2	hypothetical protein
185034_s_at	1.11708	0.015072	T23B12.6	T23B12.6 /// WBGene00020721	hypothetical protein /// status:Confirmed
177960_at	1.11691	0.40377	C47F8.4	C47F8.4 /// WBGene00008160	hypothetical protein /// locus:glct-4
182436_at	1.11681	0.17118	H19J13.1	otpl-8 /// WBGene00010403	OToPetrin-Like /// locus:otpl-8
174520_s_at	1.11676	0.048587	F57F5.2	gcy-33 /// WBGene00001553	Guanylyl CYclase /// locus:gcy-33
181015_at	1.11652	0.11429	C45G7.5	cdh-10 /// WBGene00000402	CaDHerin family /// locus:cdh-10
184651_at	1.11644	0.48544	Y47D9A.3	WBGene00021630 /// Y47D9A.3	status:Partially_confirmed /// hypothetical protein
178077_at	1.11642	0.17104	F57F5.3	F57F5.3 /// WBGene00010205	hypothetical protein /// status:Partially_confirmed
173736_at	1.11641	0.054623	Y11D7A.12	flh-1	FLYWCH zinc finger transcription factor homolog
179829_at	1.1164	0.086552	Y51A2B.5	WBGene00013069 /// Y51A2B.5	status:Partially_confirmed /// hypothetical protein
180172_at	1.1164	0.066458	R04E5.8	R04E5.8	hypothetical protein
176888_at	1.11638	0.07029	Y73E7A.4	cpx-1 /// WBGene00022271	ComPleXin (synaptic protein) homolog /// locus:cpx-1
186942_s_at	1.11634	0.001579	C41C4.7	ctns-1	CysTiNoSin (lysosomal protein) homolog
171778_x_at	1.1163	0.091893	Y39G8B.1	Y39G8B.1	hypothetical protein
193167_s_at	1.1163	0.032167	F52C9.8	pqe-1	PolyQ (poly glutamine tract) toxicity Enhancer
194038_s_at	1.1163	0.030916	C44B7.9	pmp-2 /// WBGene00004059	Peroxisomal Membrane Protein related /// locus:pmp-2
190915_at	1.11629	0.033506	C29H12.1	rrt-2 /// WBGene00004680	aRginyl aa-tRNA syntheTase /// locus:rrt-2
178087_s_at	1.11611	0.078012	F58B3.2 /// F58B3.3	lys-5 /// lys-6 /// WBGene00003094 /// WBGene00003095	LYSozyme /// LYSozyme /// locus:lys-5 /// locus:lys-6
189747_at	1.1161	0.076873	F14E5.1	F14E5.1 /// WBGene00008799	hypothetical protein /// glucose transporter
180948_at	1.11608	0.38353	F52E1.5	F52E1.5 /// WBGene00018694	hypothetical protein /// status:Partially_confirmed
188507_s_at	1.11604	0.034724	F54E7.7	rcn-1 /// WBGene00004321	Regulator of CalciNeurin /// locus:rcn-1
186549_at	1.11584	0.3461	ZK632.9	WBGene00014016 /// ZK632.9	status:Confirmed /// hypothetical protein
180645_at	1.11578	0.38104	K06H6.5	K06H6.5 /// WBGene00019453	hypothetical protein /// status:Partially_confirmed
191767_at	1.11573	0.39305	F55H12.5	F55H12.5 /// WBGene00010136	hypothetical protein /// status:Confirmed
183519_at	1.11573	0.41782	F25B4.4	F25B4.4 /// WBGene00017767	hypothetical protein /// status:Confirmed
190351_at	1.11562	0.14019	Y75B8A.9	gly-11	GLYcosylation related
174767_at	1.11562	0.14747	K07G5.1	crml-1 /// WBGene00010641	CARMIL (Capping, ARp2/3, Myosin I Linker protein) homolog /// locus:crml-1
174599_at	1.1156	0.067567	R11A8.7	R11A8.7	hypothetical protein
180852_at	1.1155	0.29943	F30A10.2	F30A10.2 /// WBGene00009261	hypothetical protein /// status:Confirmed
177403_at	1.11544	0.24782	F58D5.6	F58D5.6 /// WBGene00010245	hypothetical protein /// status:Predicted
188599_s_at	1.11539	0.12148	F45E12.3	cul-4 /// WBGene00000839	CULlin /// locus:cul-4
173484_at	1.11538	0.10135	F53H8.4	sms-2 /// WBGene00004893	SphingoMyelin Synthase /// locus:sms-2
179712_at	1.11523	0.12859	R13F6.1	kbp-1 /// WBGene00020064	KNL (kinetochore null) Binding Protein /// locus:kbp-1
179733_s_at	1.11521	0.24148	K11G9.5	K11G9.5 /// WBGene00019655	hypothetical protein /// status:Partially_confirmed
188865_at	1.11516	0.022639	B0545.4	transposase /// WBGene00015247	hypothetical protein /// transposase
174966_at	1.11513	0.074372	C46F4.2	acs-17 /// WBGene00016716	fatty Acid CoA Synthetase family /// locus:acs-17
190352_s_at	1.11511	0.005341	T08B2.7	T08B2.7	hypothetical protein
186921_s_at	1.11491	0.18761	Y53C10A.13	---	---
173740_s_at	1.11485	0.24127	F41D9.5	sulp-3 /// WBGene00018283	SULfate Permease family /// locus:sulp-3
180555_at	1.11476	0.20225	C48B6.4	C48B6.4 /// WBGene00016742	hypothetical protein /// status:Partially_confirmed
177867_at	1.11466	0.066245	F23B2.7	F23B2.7	hypothetical protein
190483_at	1.11464	0.19487	B0393.2	rbg-3 /// WBGene00007167	RaB GAP related /// locus:rbg-3
189019_at	1.1146	0.043447	C31E10.7	C31E10.7 /// WBGene00007848	hypothetical protein /// cytochrome b5
189741_at	1.1144	0.3056	T23B12.2	T23B12.2 /// WBGene00020717	hypothetical protein /// ribosomal protein
179799_s_at	1.11439	0.052588	F27D9.6	dhs-29 /// WBGene00000992	DeHydrogenases, Short chain /// locus:dhs-29
175115_at	1.11437	0.2593	Y64H9A.2	WBGene00022024 /// Y64H9A.2	status:Confirmed /// hypothetical protein
178289_at	1.11428	0.15701	F55C5.1	F55C5.1 /// WBGene00010091	hypothetical protein /// status:Confirmed
179607_at	1.11384	0.5	C18E9.9	C18E9.9 /// WBGene00007689	hypothetical protein /// status:Confirmed
173870_s_at	1.11382	0.02173	F57B9.8	F57B9.8 /// WBGene00018999	hypothetical protein /// putative protein tyrosine kinase
190892_at	1.11376	0.13834	E02H1.4	pme-2 /// WBGene00004050	Poly(ADP-ribose) Metabolism Enzyme /// locus:pme-2
189924_at	1.11374	0.28487	Y8A9A.2	thrombospondin-like /// WBGene00021171	hypothetical protein /// thrombospondin-like
181331_s_at	1.11374	0.091026	K09C6.7 /// K09C6.8	K09C6.7 /// K09C6.8 /// WBGene00019561 /// WBGene00019562	hypothetical protein /// hypothetical protein /// status:Confirmed /// status:Partially_confirmed
181669_at	1.11371	0.20787	K02F6.2	K02F6.2 /// WBGene00019336	hypothetical protein /// status:Partially_confirmed
181700_at	1.11364	0.039101	T25B6.5	T25B6.5 /// WBGene00020791	hypothetical protein /// status:Partially_confirmed
183357_at	1.11359	0.026103	Y50E8A.1	WBGene00013046 /// Y50E8A.1	status:Partially_confirmed /// hypothetical protein
185418_at	1.11358	0.017602	Y73B6A.3	WBGene00022230 /// Y73B6A.3	status:Partially_confirmed /// hypothetical protein
175817_at	1.11349	0.011852	F48E3.1	gly-12	GLYcosylation related
186297_s_at	1.11348	0.056647	C08F11.10	C08F11.10 /// WBGene00007457	hypothetical protein /// status:Partially_confirmed
173853_at	1.11345	0.20458	F15A8.5	dop-1	DOPamine receptor
184927_s_at	1.11336	0.34376	Y53C12B.6	cutl-2 /// WBGene00013145	CUTiclin-Like /// locus:cutl-2
187505_at	1.11335	0.020561	B0310.3	B0310.3 /// WBGene00015139	hypothetical protein /// status:Partially_confirmed
185409_at	1.11325	0.1576	Y57A10B.2	WBGene00013274 /// Y57A10B.2	status:Predicted /// hypothetical protein
180429_at	1.11314	0.15055	K10H10.7	K10H10.7 /// WBGene00010763	hypothetical protein /// status:Partially_confirmed
188511_s_at	1.11313	0.40554	C08B6.4 /// C51E3.8	chitinase	hypothetical protein
184076_at	1.11309	0.16598	C01G5.4	C01G5.4 /// WBGene00015306	hypothetical protein /// status:Partially_confirmed
176870_at	1.11304	0.041119	ZK616.8	WBGene00022778 /// ZK616.8	status:Partially_confirmed /// hypothetical protein
193925_at	1.11296	0.4679	F09C6.4	---	---
188710_s_at	1.11289	0.048408	T21H3.3	cmd-1 /// WBGene00000552	CalModulin /// locus:cmd-1
180997_at	1.11287	0.15551	C34D4.3	C34D4.3 /// WBGene00016399	hypothetical protein /// status:Confirmed
191512_at	1.11277	0.13344	T22G5.5	sptl-3 /// WBGene00011932	Serine Palmitoyl Transferase famiLy /// locus:sptl-3
174104_at	1.11269	0.084086	Y71H2AM.12	WBGene00022177 /// Y71H2AM.12	status:Confirmed /// hypothetical protein
183251_s_at	1.11261	0.031031	F31D5.4	F31D5.4 /// WBGene00017947	hypothetical protein /// status:Partially_confirmed
190968_at	1.11252	0.081943	F11D5.7	F11D5.7 /// WBGene00043980	hypothetical protein /// status:Partially_confirmed
186074_at	1.11245	0.052133	R03H10.6	R03H10.6 /// WBGene00019858	hypothetical protein /// status:Confirmed
192196_at	1.11212	0.19665	C25E10.1	nhr-30 /// WBGene00016091	Nuclear Hormone Receptor family /// locus:nhr-30
186384_s_at	1.11209	0.19623	Y43F11A.1 /// Y43F11A.4	WBGene00012841 /// WBGene00012844 /// Y43F11A.1 /// Y43F11A.4	status:Predicted /// status:Predicted /// hypothetical protein /// hypothetical protein
187215_at	1.11206	0.095004	C38C10.3	C38C10.3 /// WBGene00008001	hypothetical protein /// status:Partially_confirmed
187120_at	1.11198	0.48505	R11G11.13	srw-107 /// WBGene00005854	Serpentine Receptor, class W /// locus:srw-107
176795_at	1.11192	0.04267	Y49C4A.3	srbc-37 /// WBGene00021708	Serpentine Receptor, class BC (class B-like) /// locus:srbc-37
192347_s_at	1.11189	0.024444	ZK858.6	ZK858.6	hypothetical protein
171760_x_at	1.11188	0.15514	F56D2.6	F56D2.6	hypothetical protein
181976_at	1.11178	0.054136	Y76A2A.1	tag-164 /// WBGene00006509	Temporarily Assigned Gene name /// locus:tag-164
183066_at	1.11176	0.022929	F13B9.8	fis-2	S. cerevisiae FIS1-related
179210_at	1.11172	0.25246	T05F1.9	T05F1.9 /// WBGene00011494	hypothetical protein /// status:Partially_confirmed
180413_at	1.11167	0.17079	E02H9.6	E02H9.6 /// WBGene00017104	hypothetical protein /// status:Predicted
193202_at	1.11154	0.04465	ZK863.5	srd-4 /// WBGene00005082	Serpentine Receptor, class D (delta) /// locus:srd-4
188748_s_at	1.11152	0.014865	H25P06.1	Hexokinases /// WBGene00010416	hypothetical protein /// Hexokinases
175716_at	1.11141	0.21657	W03C9.4	lin-29	abnormal cell LINeage
184120_at	1.1114	0.31127	K01A11.1	K01A11.1 /// WBGene00010449	hypothetical protein /// status:Partially_confirmed
183647_at	1.11139	0.21608	F13H10.5	F13H10.5 /// WBGene00008776	hypothetical protein /// status:Partially_confirmed
173855_at	1.11139	0.38164	T22B11.5	T22B11.5 /// WBGene00020679	hypothetical protein /// 2-oxoglutarate dehydrogenase
178159_at	1.11129	0.37734	F44F1.5	---	---
191664_s_at	1.11119	0.21846	K07F5.6	K07F5.6 /// WBGene00010634	hypothetical protein /// protein-tyrosine phosphatase
191638_s_at	1.11099	0.034247	C55B7.3 /// F10G8.1	C55B7.3 /// WBGene00016942	hypothetical protein /// protein-tyrosine phosphatase
AFFX-r2-Bs-lys-3_at	1.11095	0.095581	---	---	---
190380_at	1.1109	0.10662	F59E11.10	nhr-195 /// WBGene00019115	Nuclear Hormone Receptor family /// locus:nhr-195
187580_s_at	1.11053	0.11022	K09G1.1	K09G1.1	hypothetical protein
174583_at	1.1105	0.25064	ZK370.4	ZK370.4	hypothetical protein
181505_s_at	1.11037	0.048848	Y37H9A.3	WBGene00012578 /// Y37H9A.3	status:Partially_confirmed /// hypothetical protein
189928_at	1.11028	0.24973	T19A5.5	nhr-219 /// WBGene00020555	Nuclear Hormone Receptor family /// locus:nhr-219
185731_at	1.11026	0.24212	F59E11.6	F59E11.6 /// WBGene00019112	hypothetical protein /// status:Partially_confirmed
190628_at	1.11024	0.031536	F32A5.4	F32A5.4	hypothetical protein
178359_s_at	1.1102	0.11421	T28B8.1	T28B8.1 /// WBGene00012113	hypothetical protein /// status:Confirmed
183150_s_at	1.11017	0.28683	---	---	---
192086_s_at	1.11012	0.14825	Y51A2D.18	WBGene00013083 /// Y51A2D.18	Sugar (and other) transporter /// hypothetical protein
185150_at	1.10996	0.48521	C16A11.2	C16A11.2	hypothetical protein
176004_at	1.10978	0.008431	M02H5.4	nhr-202 /// WBGene00019742	Nuclear Hormone Receptor family /// locus:nhr-202
185797_s_at	1.10967	0.35278	ZK1005.1	pme-5	Poly(ADP-ribose) Metabolism Enzyme
194240_x_at	1.1094	0.06014	Y46G5A.30	snf-5 /// WBGene00004904	Sodium:Neurotransmitter symporter Family /// locus:snf-5
188624_at	1.10933	0.10481	F22B7.10	dpy-19 /// WBGene00001078	DumPY : shorter than wild-type /// locus:dpy-19
172884_x_at	1.10922	0.074905	R08C7.8	R08C7.8 /// WBGene00019951	hypothetical protein /// serine/threonine protein phosphatase
174019_s_at	1.10918	0.21988	Y41D4B.8	nhr-92 /// WBGene00003682	Nuclear Hormone Receptor family /// locus:nhr-92
180968_at	1.10912	0.17576	T04C9.1	T04C9.1	hypothetical protein
186805_s_at	1.10898	0.10882	F19B2.4 /// Y116F11B.4	---	---
178913_at	1.10887	0.017088	C01H6.6	C01H6.6 /// WBGene00007255	hypothetical protein /// status:Partially_confirmed
181182_at	1.10884	0.5	R12E2.8	R12E2.8 /// WBGene00020034	hypothetical protein /// status:Partially_confirmed
189280_at	1.10879	0.017844	F55A12.4	dhs-2	DeHydrogenases, Short chain
192170_s_at	1.10868	0.13453	F48E8.3	F48E8.3 /// WBGene00018610	hypothetical protein /// fumarate reductase flavoprotein
180688_at	1.10863	0.05654	C38C3.7	C38C3.7 /// WBGene00016515	hypothetical protein /// status:Partially_confirmed
180309_s_at	1.10852	0.002068	F49E2.5	F49E2.5	hypothetical protein
183261_at	1.10852	0.26348	H03G16.5	H03G16.5 /// WBGene00010361	hypothetical protein /// status:Partially_confirmed
178237_at	1.10845	0.017088	F19B2.8	srz-16 /// WBGene00008947	Serpentine Receptor, class Z /// locus:srz-16
177057_s_at	1.10832	0.044953	R53.5	R53.5 /// WBGene00011274	hypothetical protein /// status:Partially_confirmed
178555_at	1.10831	0.1092	F13E9.14 /// F13E9.8	F13E9.14 /// F13E9.8 /// WBGene00008757 /// WBGene00045207	hypothetical protein /// hypothetical protein /// status:Predicted /// status:Predicted
172959_s_at	1.10829	0.12316	T07D10.1	T07D10.1 /// WBGene00011581	hypothetical protein /// status:Partially_confirmed
172977_at	1.10825	0.040258	---	Y71A12B.12	Hypothetical protein (Y71A12B.12)
184852_at	1.10812	0.16315	Y116A8A.6	WBGene00013776 /// Y116A8A.6	status:Partially_confirmed /// hypothetical protein
172794_x_at	1.10809	0.23757	F54D1.3	---	---
174674_at	1.10806	0.019406	F49E2.5	F49E2.5	hypothetical protein
177558_at	1.10806	0.49184	F41E7.2	F41E7.2 /// WBGene00009618	hypothetical protein /// status:Partially_confirmed
191363_s_at	1.10801	0.072048	ZK154.7	adm-4 /// WBGene00000075	ADAM (disintegrin plus metalloprotease) family /// locus:adm-4
178599_at	1.108	0.30882	T22G5.7	spp-12 /// WBGene00004997	SaPosin-like Protein family /// locus:spp-12
181715_s_at	1.10787	0.30687	T19B10.2	T19B10.2 /// WBGene00011831	hypothetical protein /// status:Confirmed
184572_at	1.10781	0.033431	Y57A10B.1	WBGene00013273 /// Y57A10B.1	status:Partially_confirmed /// hypothetical protein
184304_at	1.10776	0.30985	Y73F8A.13	Y73F8A.13	hypothetical protein
179337_at	1.10767	0.080831	F26H9.1	prom-1 /// WBGene00009173	PRogression Of Meiosis /// locus:prom-1
177584_s_at	1.10764	0.039101	F37A8.2	F37A8.2 /// WBGene00009502	hypothetical protein /// status:Partially_confirmed
179347_at	1.10734	0.22346	C12D8.9	C12D8.9 /// WBGene00007538	hypothetical protein /// status:Partially_confirmed
190605_at	1.10731	0.079483	F22B3.8	F22B3.8 /// WBGene00009039	hypothetical protein /// tyrosine-protein kinase
180327_at	1.10727	0.02465	F30A10.3	F30A10.3 /// WBGene00009262	hypothetical protein /// status:Confirmed
174058_s_at	1.10726	0.34743	C16C8.19	C16C8.19 /// WBGene00015856	hypothetical protein /// status:Confirmed
173527_at	1.10722	0.29804	C16H3.3	C16H3.3	hypothetical protein
184739_at	1.10719	0.19708	C33C12.5	fbxb-38 /// WBGene00016337	F-box B protein /// locus:fbxb-38
190033_at	1.10719	0.18421	F17B5.10	oac-17 /// WBGene00008906	O-ACyltransferase homolog /// locus:oac-17
172523_x_at	1.1071	0.40107	F40C5.2 /// T24A6.17	F40C5.2 /// T24A6.17 /// WBGene00018229 /// WBGene00020754	hypothetical protein /// hypothetical protein /// status:Predicted /// status:Predicted
AFFX-r2-Bs-phe-5_at	1.10695	0.16032	---	---	---
178782_at	1.10688	0.009902	D1081.6	D1081.6	hypothetical protein
179366_at	1.10683	0.037931	F22D6.2	F22D6.2 /// WBGene00009050	hypothetical protein /// status:Confirmed
193707_s_at	1.10681	0.047089	C16C10.12	WBGene00007631 /// wht-3	locus:wht-3 /// WHiTe (Drosophila) related ABC transporte
194021_s_at	1.1068	0.042189	C55B7.2	gly-2 /// WBGene00001627	GLYcosylation related /// locus:gly-2
175576_s_at	1.10679	0.33154	Y75B7AR.1	WBGene00022287 /// Y75B7AR.1	status:Confirmed /// hypothetical protein
191463_at	1.10679	0.11111	Y51H1A.5	hda-6 /// WBGene00001838	Histone DeAcetylase /// locus:hda-6
192952_at	1.10679	0.18923	F56B6.5	uvt-6	Unidentified Vitellogenin-linked Transcript
180370_at	1.10671	0.022003	K02F3.3	far-8 /// WBGene00001392	Fatty Acid/Retinol binding protein /// locus:far-8
179382_at	1.1067	0.14467	F38C2.4	F38C2.4 /// WBGene00009536	hypothetical protein /// status:Predicted
189808_at	1.10658	0.15806	Y4C6A.2	mgl-3	Metabotropic GLutamate receptor family
177079_at	1.10654	0.26097	Y55F3BR.7	WBGene00021944 /// Y55F3BR.7	status:Predicted /// hypothetical protein
173544_at	1.10649	0.21411	C18B12.6	C18B12.6 /// WBGene00007668	hypothetical protein /// status:Partially_confirmed
176499_at	1.10638	0.002534	Y54F10AM.4	ceh-44	Homeobox
185454_s_at	1.10634	0.33915	F38A5.10 /// F38A5.12 /// F38A5.14 /// F38A5.5 /// F38A5.9	nspb-1 /// nspb-2 /// nspb-3 /// nspb-4 /// nspb-5 /// WBGene00018162 /// WBGene00018166 /// WBGene00018167 /// WBGene00018169 /// WBGene00018170	Nematode Specific Peptide family, group B /// Nematode Specific Peptide family, group B /// Nematode Specific Peptide family, group B /// Nematode Specific Peptide family, group B /// Nematode Specific Peptide family, group B /// locus:nspb-3 /// locus:nspb-5 /// locus:nspb-4 /// locus:nspb-2 /// locus:nspb-1
179956_at	1.10594	0.029278	B0207.9	B0207.9 /// WBGene00015032	hypothetical protein /// status:Confirmed
186962_at	1.1059	0.059319	Y47G6A.18	WBGene00021644 /// Y47G6A.18	status:Partially_confirmed /// hypothetical protein
180923_at	1.10588	0.014865	F44D12.8	F44D12.8 /// WBGene00009685	hypothetical protein /// status:Confirmed
174249_at	1.10584	0.10872	---	---	---
180845_s_at	1.10575	0.019185	R07G3.8	R07G3.8 /// WBGene00019944	hypothetical protein /// status:Confirmed
175411_at	1.10575	0.44593	---	---	---
190824_at	1.10573	0.4301	F16B12.7	F16B12.7 /// WBGene00008883	hypothetical protein /// serine/threonine kinase
187828_at	1.10569	0.009458	C24A11.8	frm-4	FERM domain (protein4.1-ezrin-radixin-moesin) family
179836_at	1.10556	0.1989	K07E8.5	K07E8.5 /// WBGene00019496	hypothetical protein /// status:Partially_confirmed
192648_at	1.10546	0.097499	C18H9.5	C18H9.5 /// WBGene00016003	hypothetical protein /// sodium/phosphate transport protein
192367_at	1.10538	0.059615	M02A10.3	sli-1	Suppressor of LIneage defect
180683_at	1.10535	0.33597	K09C6.5	srbc-13 /// WBGene00019559	Serpentine Receptor, class BC (class B-like) /// locus:srbc-13
182179_s_at	1.1053	0.14222	F45E4.7	F45E4.7	hypothetical protein
182807_at	1.10521	0.047089	C43D7.6 /// ZK262.11	srh-208 /// srh-209 /// WBGene00005418 /// WBGene00005419	Serpentine Receptor, class H /// Serpentine Receptor, class H /// locus:srh-208 /// locus:srh-209
191205_s_at	1.10515	0.33285	C33G8.11	nhr-107 /// WBGene00003697	Nuclear Hormone Receptor family /// locus:nhr-107
184543_s_at	1.10515	0.24121	Y57G7A.5	WBGene00021968 /// Y57G7A.5	status:Partially_confirmed /// hypothetical protein
189366_at	1.10512	0.090409	K07C6.4	cyp-35B1 /// WBGene00019472	CYtochrome P450 family /// locus:cyp-35B1
184851_at	1.105	0.19079	T28A11.4	T28A11.4 /// WBGene00020871	hypothetical protein /// status:Predicted
188621_at	1.10493	0.016164	Y40B1A.2	WBGene00012733 /// Y40B1A.2	WW domain /// hypothetical protein
178395_at	1.10487	0.14767	C07B5.2	C07B5.2 /// WBGene00007407	hypothetical protein /// status:Partially_confirmed
191252_s_at	1.10487	0.035772	R07E4.4	mig-23 /// WBGene00003254	abnormal cell MIGration /// locus:mig-23
173199_at	1.10474	0.052516	Y82E9BR.5	WBGene00022338 /// Y82E9BR.5	status:Partially_confirmed /// hypothetical protein
193938_s_at	1.10472	0.2064	T16H12.5	bath-43	BTB and MATH domain containing
180965_at	1.10466	0.0503	W04B5.1	W04B5.1 /// WBGene00021018	hypothetical protein /// status:Confirmed
172517_x_at	1.10463	0.022477	Y39G8B.1	Y39G8B.1	hypothetical protein
177413_s_at	1.10451	0.41893	F31E8.2	snt-1	SyNapTotagmin
191259_s_at	1.10432	0.06559	Y45F3A.9	WBGene00012864 /// Y45F3A.9	SpoU rRNA Methylase family /// hypothetical protein
188630_at	1.1041	0.014738	C18E9.1	cal-2 /// WBGene00000286	CALmodulin related genes /// locus:cal-2
189642_at	1.104	0.33597	B0238.10	acyltransfersase /// WBGene00015074	hypothetical protein /// acyltransfersase
[truncated: 20,630 more rows]

## Sheet: DAVID UP LET-7 VS LIN-29
Functional Annotation Clustering Tool from DAVID Bioinformatics Resources 6.7 (Huang et al., Nature Protocols 2009;4(1):44-57; Huang et al., NAR 2009;37(1):1-13)
Annotation Cluster 1	Enrichment Score: 10.558542656655504
Category	Term	Count	%	PValue	Genes	List Total	Pop Hits	Pop Total	Fold Enrichment	Bonferroni	Benjamini	FDR
GOTERM_BP_FAT	GO:0006470~protein amino acid dephosphorylation	33	2.83993	1.3072e-11	176863_AT, 191746_AT, 191891_AT, 192761_S_AT, 191865_S_AT, 191638_S_AT, 191899_AT, 177448_AT, 189912_AT, 172859_X_AT, 192023_S_AT, 191763_S_AT, 191913_S_AT, 172380_X_AT, 191766_S_AT, 181933_AT, 191994_AT, 192051_AT, 173344_AT, 193160_S_AT, 172786_X_AT, 177525_S_AT, 176005_AT, 191876_S_AT, 193217_AT, 191985_AT, 186678_S_AT, 174540_S_AT, 191900_S_AT, 184708_S_AT, 193734_AT, 191521_S_AT, 192796_AT, …	519	125	7838	3.98696	1.16994e-08	5.84971e-09	2.03612e-08
GOTERM_MF_FAT	GO:0004725~protein tyrosine phosphatase activity	33	2.83993	1.70339e-11	176863_AT, 191746_AT, 191891_AT, 192761_S_AT, 191865_S_AT, 191638_S_AT, 191899_AT, 177448_AT, 189912_AT, 172859_X_AT, 192023_S_AT, 191763_S_AT, 191913_S_AT, 172380_X_AT, 191766_S_AT, 181933_AT, 191994_AT, 192051_AT, 173344_AT, 193160_S_AT, 172786_X_AT, 177525_S_AT, 176005_AT, 191876_S_AT, 193217_AT, 191985_AT, 186678_S_AT, 174540_S_AT, 191900_S_AT, 184708_S_AT, 193734_AT, 191521_S_AT, 192796_AT, …	487	116	6686	3.90565	7.54603e-09	3.77302e-09	2.41118e-08
GOTERM_BP_FAT	GO:0016311~dephosphorylation	33	2.83993	9.47802e-11	176863_AT, 191746_AT, 191891_AT, 192761_S_AT, 191865_S_AT, 191638_S_AT, 191899_AT, 177448_AT, 189912_AT, 172859_X_AT, 192023_S_AT, 191763_S_AT, 191913_S_AT, 172380_X_AT, 191766_S_AT, 181933_AT, 191994_AT, 192051_AT, 173344_AT, 193160_S_AT, 172786_X_AT, 177525_S_AT, 176005_AT, 191876_S_AT, 193217_AT, 191985_AT, 186678_S_AT, 174540_S_AT, 191900_S_AT, 184708_S_AT, 193734_AT, 191521_S_AT, 192796_AT, …	519	134	7838	3.71918	8.48283e-08	2.82761e-08	1.47632e-07
Annotation Cluster 2	Enrichment Score: 6.213019554121671
Category	Term	Count	%	PValue	Genes	List Total	Pop Hits	Pop Total	Fold Enrichment	Bonferroni	Benjamini	FDR
GOTERM_MF_FAT	GO:0030554~adenyl nucleotide binding	114	9.81067	5.22455e-07	174379_S_AT, 190717_S_AT, 190000_S_AT, 189193_AT, 173163_S_AT, 190156_S_AT, 194087_S_AT, 189191_AT, 194057_AT, 191914_AT, 175227_S_AT, 189719_AT, 193339_S_AT, 194031_AT, 187614_AT, 191580_S_AT, 188118_S_AT, 174169_AT, 192616_AT, 190165_S_AT, 189720_S_AT, 190478_AT, 190745_AT, 192822_S_AT, 172990_AT, 189236_S_AT, 186107_S_AT, 192513_AT, 185198_AT, 188492_S_AT, 191894_AT, 190509_AT, 193707_S_AT, 19…	487	1009	6686	1.55114	0.000231421	4.62885e-05	0.000739542
GOTERM_MF_FAT	GO:0001883~purine nucleoside binding	114	9.81067	5.44966e-07	174379_S_AT, 190717_S_AT, 190000_S_AT, 189193_AT, 173163_S_AT, 190156_S_AT, 194087_S_AT, 189191_AT, 194057_AT, 191914_AT, 175227_S_AT, 189719_AT, 193339_S_AT, 194031_AT, 187614_AT, 191580_S_AT, 188118_S_AT, 174169_AT, 192616_AT, 190165_S_AT, 189720_S_AT, 190478_AT, 190745_AT, 192822_S_AT, 172990_AT, 189236_S_AT, 186107_S_AT, 192513_AT, 185198_AT, 188492_S_AT, 191894_AT, 190509_AT, 193707_S_AT, 19…	487	1010	6686	1.5496	0.000241391	4.02358e-05	0.000771406
GOTERM_MF_FAT	GO:0001882~nucleoside binding	114	9.81067	8.06349e-07	174379_S_AT, 190717_S_AT, 190000_S_AT, 189193_AT, 173163_S_AT, 190156_S_AT, 194087_S_AT, 189191_AT, 194057_AT, 191914_AT, 175227_S_AT, 189719_AT, 193339_S_AT, 194031_AT, 187614_AT, 191580_S_AT, 188118_S_AT, 174169_AT, 192616_AT, 190165_S_AT, 189720_S_AT, 190478_AT, 190745_AT, 192822_S_AT, 172990_AT, 189236_S_AT, 186107_S_AT, 192513_AT, 185198_AT, 188492_S_AT, 191894_AT, 190509_AT, 193707_S_AT, 19…	487	1017	6686	1.53894	0.000357149	4.46506e-05	0.0011414
Annotation Cluster 3	Enrichment Score: 3.2023801337932842
Category	Term	Count	%	PValue	Genes	List Total	Pop Hits	Pop Total	Fold Enrichment	Bonferroni	Benjamini	FDR
INTERPRO	IPR006091:Acyl-CoA oxidase/dehydrogenase, central region	8	0.688468	0.000344426	194057_AT, 173911_S_AT, 194054_S_AT, 185198_AT, 190627_AT, 190156_S_AT, 190484_AT, 190478_AT	844	23	13633	5.61838	0.302315	0.0321964	0.545835
INTERPRO	IPR013764:Acyl-CoA oxidase/dehydrogenase, type1/2, C-terminal	8	0.688468	0.000460523	194057_AT, 173911_S_AT, 194054_S_AT, 185198_AT, 190627_AT, 190156_S_AT, 190484_AT, 190478_AT	844	24	13633	5.38428	0.382056	0.0393193	0.729192
GOTERM_MF_FAT	GO:0003995~acyl-CoA dehydrogenase activity	8	0.688468	0.0015578	194057_AT, 173911_S_AT, 194054_S_AT, 185198_AT, 190627_AT, 190156_S_AT, 190484_AT, 190478_AT	487	25	6686	4.39326	0.498747	0.0376423	2.18264
Annotation Cluster 4	Enrichment Score: 2.3263856991279153
Category	Term	Count	%	PValue	Genes	List Total	Pop Hits	Pop Total	Fold Enrichment	Bonferroni	Benjamini	FDR
GOTERM_MF_FAT	GO:0016291~acyl-CoA thioesterase activity	5	0.430293	0.00406646	183702_AT, 183894_AT, 187825_S_AT, 182120_AT, 190330_S_AT, 173151_S_AT	487	10	6686	6.86448	0.835544	0.0906325	5.60469
GOTERM_BP_FAT	GO:0006637~acyl-CoA metabolic process	5	0.430293	0.00428084	183702_AT, 183894_AT, 187825_S_AT, 182120_AT, 190330_S_AT, 173151_S_AT	519	11	7838	6.8646	0.978497	0.273825	6.46388
GOTERM_MF_FAT	GO:0016289~CoA hydrolase activity	5	0.430293	0.00602696	183702_AT, 183894_AT, 187825_S_AT, 182120_AT, 190330_S_AT, 173151_S_AT	487	11	6686	6.24043	0.931301	0.125323	8.20119
Annotation Cluster 5	Enrichment Score: 2.232818062760809
Category	Term	Count	%	PValue	Genes	List Total	Pop Hits	Pop Total	Fold Enrichment	Bonferroni	Benjamini	FDR
GOTERM_BP_FAT	GO:0009725~response to hormone stimulus	4	0.344234	0.00493641	187680_S_AT, 194014_S_AT, 175210_AT, 194058_S_AT	519	6	7838	10.0681	0.988074	0.271202	7.41853
GOTERM_BP_FAT	GO:0032870~cellular response to hormone stimulus	4	0.344234	0.00493641	187680_S_AT, 194014_S_AT, 175210_AT, 194058_S_AT	519	6	7838	10.0681	0.988074	0.271202	7.41853
GOTERM_BP_FAT	GO:0009719~response to endogenous stimulus	4	0.344234	0.00821719	187680_S_AT, 194014_S_AT, 175210_AT, 194058_S_AT	519	7	7838	8.62978	0.999379	0.388792	12.0606
Annotation Cluster 6	Enrichment Score: 2.1881819143402312
Category	Term	Count	%	PValue	Genes	List Total	Pop Hits	Pop Total	Fold Enrichment	Bonferroni	Benjamini	FDR
GOTERM_BP_FAT	GO:0006635~fatty acid beta-oxidation	5	0.430293	0.00287291	190352_S_AT, 194057_AT, 173911_S_AT, 194054_S_AT, 190156_S_AT	519	10	7838	7.55106	0.923843	0.227015	4.38242
GOTERM_BP_FAT	GO:0009062~fatty acid catabolic process	5	0.430293	0.00287291	190352_S_AT, 194057_AT, 173911_S_AT, 194054_S_AT, 190156_S_AT	519	10	7838	7.55106	0.923843	0.227015	4.38242
GOTERM_BP_FAT	GO:0044242~cellular lipid catabolic process	5	0.430293	0.0330226	190352_S_AT, 194057_AT, 173911_S_AT, 194054_S_AT, 190156_S_AT	519	19	7838	3.97424	1	0.699458	40.7291
Annotation Cluster 7	Enrichment Score: 1.8927112570507132
Category	Term	Count	%	PValue	Genes	List Total	Pop Hits	Pop Total	Fold Enrichment	Bonferroni	Benjamini	FDR
INTERPRO	IPR012258:Acyl-CoA oxidase	4	0.344234	0.00683154	194057_AT, 173911_S_AT, 194054_S_AT, 190156_S_AT	844	7	13633	9.2302	0.999226	0.289024	10.3193
PIR_SUPERFAMILY	PIRSF000168:Acyl-CoA_oxidase	4	0.344234	0.00954735	194057_AT, 173911_S_AT, 194054_S_AT, 190156_S_AT	318	7	4541	8.15993	0.944288	0.618071	12.0375
INTERPRO	IPR002655:Acyl-CoA oxidase, C-terminal	4	0.344234	0.0104318	194057_AT, 173911_S_AT, 194054_S_AT, 190156_S_AT	844	8	13633	8.07642	0.999983	0.366567	15.3474
GOTERM_MF_FAT	GO:0003997~acyl-CoA oxidase activity	4	0.344234	0.0162191	194057_AT, 173911_S_AT, 194054_S_AT, 190156_S_AT	487	8	6686	6.86448	0.999286	0.270178	20.6631
GOTERM_MF_FAT	GO:0016634~oxidoreductase activity, acting on the CH-CH group of donors, oxygen as acceptor	4	0.344234	0.0311644	194057_AT, 173911_S_AT, 194054_S_AT, 190156_S_AT	487	10	6686	5.49158	0.999999	0.416927	36.1196
Annotation Cluster 8	Enrichment Score: 1.7915188021225092
Category	Term	Count	%	PValue	Genes	List Total	Pop Hits	Pop Total	Fold Enrichment	Bonferroni	Benjamini	FDR
SP_PIR_KEYWORDS	hydrogen peroxide	4	0.344234	0.00170468	188587_S_AT, 175657_S_AT, AFFX-CE_CATALASE_3_S_AT, AFFX-CE_CATALASE_5_S_AT, AFFX-CE_CATALASE_M_S_AT, 188687_S_AT	1125	5	19674	13.9904	0.325725	0.0259323	2.16507
GOTERM_BP_FAT	GO:0042744~hydrogen peroxide catabolic process	4	0.344234	0.00493641	188587_S_AT, 175657_S_AT, AFFX-CE_CATALASE_3_S_AT, AFFX-CE_CATALASE_5_S_AT, AFFX-CE_CATALASE_M_S_AT, 188687_S_AT	519	6	7838	10.0681	0.988074	0.271202	7.41853
GOTERM_BP_FAT	GO:0070301~cellular response to hydrogen peroxide	4	0.344234	0.00493641	188587_S_AT, 175657_S_AT, AFFX-CE_CATALASE_3_S_AT, AFFX-CE_CATALASE_5_S_AT, AFFX-CE_CATALASE_M_S_AT, 188687_S_AT	519	6	7838	10.0681	0.988074	0.271202	7.41853
GOTERM_BP_FAT	GO:0042743~hydrogen peroxide metabolic process	4	0.344234	0.00493641	188587_S_AT, 175657_S_AT, AFFX-CE_CATALASE_3_S_AT, AFFX-CE_CATALASE_5_S_AT, AFFX-CE_CATALASE_M_S_AT, 188687_S_AT	519	6	7838	10.0681	0.988074	0.271202	7.41853
GOTERM_BP_FAT	GO:0034614~cellular response to reactive oxygen species	4	0.344234	0.00493641	188587_S_AT, 175657_S_AT, AFFX-CE_CATALASE_3_S_AT, AFFX-CE_CATALASE_5_S_AT, AFFX-CE_CATALASE_M_S_AT, 188687_S_AT	519	6	7838	10.0681	0.988074	0.271202	7.41853
GOTERM_BP_FAT	GO:0034599~cellular response to oxidative stress	4	0.344234	0.00821719	188587_S_AT, 175657_S_AT, AFFX-CE_CATALASE_3_S_AT, AFFX-CE_CATALASE_5_S_AT, AFFX-CE_CATALASE_M_S_AT, 188687_S_AT	519	7	7838	8.62978	0.999379	0.388792	12.0606
GOTERM_BP_FAT	GO:0042542~response to hydrogen peroxide	4	0.344234	0.0125082	188587_S_AT, 175657_S_AT, AFFX-CE_CATALASE_3_S_AT, AFFX-CE_CATALASE_5_S_AT, AFFX-CE_CATALASE_M_S_AT, 188687_S_AT	519	8	7838	7.55106	0.999987	0.505442	17.8037
GOTERM_BP_FAT	GO:0000302~response to reactive oxygen species	4	0.344234	0.0242734	188587_S_AT, 175657_S_AT, AFFX-CE_CATALASE_3_S_AT, AFFX-CE_CATALASE_5_S_AT, AFFX-CE_CATALASE_M_S_AT, 188687_S_AT	519	10	7838	6.04085	1	0.615652	31.8019
GOTERM_BP_FAT	GO:0006800~oxygen and reactive oxygen species metabolic process	4	0.344234	0.040331	188587_S_AT, 175657_S_AT, AFFX-CE_CATALASE_3_S_AT, AFFX-CE_CATALASE_5_S_AT, AFFX-CE_CATALASE_M_S_AT, 188687_S_AT	519	12	7838	5.03404	1	0.719307	47.3353
SP_PIR_KEYWORDS	peroxidase	4	0.344234	0.042187	188587_S_AT, 175657_S_AT, AFFX-CE_CATALASE_3_S_AT, AFFX-CE_CATALASE_5_S_AT, AFFX-CE_CATALASE_M_S_AT, 188687_S_AT	1125	14	19674	4.99657	0.999953	0.33957	42.4766
GOTERM_MF_FAT	GO:0004601~peroxidase activity	4	0.344234	0.271837	188587_S_AT, 175657_S_AT, AFFX-CE_CATALASE_3_S_AT, AFFX-CE_CATALASE_5_S_AT, AFFX-CE_CATALASE_M_S_AT, 188687_S_AT	487	25	6686	2.19663	1	0.949716	98.8785
GOTERM_MF_FAT	GO:0016684~oxidoreductase activity, acting on peroxide as acceptor	4	0.344234	0.271837	188587_S_AT, 175657_S_AT, AFFX-CE_CATALASE_3_S_AT, AFFX-CE_CATALASE_5_S_AT, AFFX-CE_CATALASE_M_S_AT, 188687_S_AT	487	25	6686	2.19663	1	0.949716	98.8785
Annotation Cluster 9	Enrichment Score: 1.7102108605430941
Category	Term	Count	%	PValue	Genes	List Total	Pop Hits	Pop Total	Fold Enrichment	Bonferroni	Benjamini	FDR
INTERPRO	IPR006186:Serine/threonine-specific protein phosphatase and bis(5-nucleosyl)-tetraphosphatase	9	0.774527	0.00973833	192694_S_AT, 192976_AT, 172935_X_AT, 188562_AT, 192715_S_AT, 193012_AT, 188563_S_AT, 191643_AT, 181168_AT, 192693_AT, 192829_AT, 194207_X_AT	844	49	13633	2.96685	0.999964	0.358937	14.3999
SMART	SM00156:PP2Ac	9	0.774527	0.0164554	192694_S_AT, 192976_AT, 172935_X_AT, 188562_AT, 192715_S_AT, 193012_AT, 188563_S_AT, 191643_AT, 181168_AT, 192693_AT, 192829_AT, 194207_X_AT	378	49	5537	2.69048	0.969832	0.442056	18.9245
INTERPRO	IPR004843:Metallophosphoesterase	9	0.774527	0.0461928	192694_S_AT, 192976_AT, 172935_X_AT, 188562_AT, 192715_S_AT, 193012_AT, 188563_S_AT, 191643_AT, 181168_AT, 192693_AT, 192829_AT, 194207_X_AT	844	65	13633	2.23655	1	0.718389	52.8303
Annotation Cluster 10	Enrichment Score: 1.4737148939569222
Category	Term	Count	%	PValue	Genes	List Total	Pop Hits	Pop Total	Fold Enrichment	Bonferroni	Benjamini	FDR
GOTERM_BP_FAT	GO:0006984~ER-nuclear signaling pathway	4	0.344234	0.0242734	188282_AT, 189087_S_AT, 188444_AT, 188973_AT	519	10	7838	6.04085	1	0.615652	31.8019
GOTERM_BP_FAT	GO:0030968~endoplasmic reticulum unfolded protein response	4	0.344234	0.0242734	188282_AT, 189087_S_AT, 188444_AT, 188973_AT	519	10	7838	6.04085	1	0.615652	31.8019
GOTERM_BP_FAT	GO:0034976~response to endoplasmic reticulum stress	4	0.344234	0.0242734	188282_AT, 189087_S_AT, 188444_AT, 188973_AT	519	10	7838	6.04085	1	0.615652	31.8019
GOTERM_BP_FAT	GO:0034620~cellular response to unfolded protein	4	0.344234	0.040331	188282_AT, 189087_S_AT, 188444_AT, 188973_AT	519	12	7838	5.03404	1	0.719307	47.3353
GOTERM_BP_FAT	GO:0051789~response to protein stimulus	4	0.344234	0.0499274	188282_AT, 189087_S_AT, 188444_AT, 188973_AT	519	13	7838	4.64681	1	0.783025	54.9667
GOTERM_BP_FAT	GO:0006986~response to unfolded protein	4	0.344234	0.0499274	188282_AT, 189087_S_AT, 188444_AT, 188973_AT	519	13	7838	4.64681	1	0.783025	54.9667
Annotation Cluster 11	Enrichment Score: 1.4582001283732577
Category	Term	Count	%	PValue	Genes	List Total	Pop Hits	Pop Total	Fold Enrichment	Bonferroni	Benjamini	FDR
INTERPRO	IPR018028:Catalase related subgroup	3	0.258176	0.0109867	188587_S_AT, AFFX-CE_CATALASE_3_S_AT, AFFX-CE_CATALASE_5_S_AT, AFFX-CE_CATALASE_M_S_AT, 188687_S_AT	844	3	13633	16.1528	0.99999	0.369844	16.0985
INTERPRO	IPR010582:Catalase-related immune responsive	3	0.258176	0.0109867	188587_S_AT, AFFX-CE_CATALASE_3_S_AT, AFFX-CE_CATALASE_5_S_AT, AFFX-CE_CATALASE_M_S_AT, 188687_S_AT	844	3	13633	16.1528	0.99999	0.369844	16.0985
INTERPRO	IPR011614:Catalase, N-terminal	3	0.258176	0.0109867	188587_S_AT, AFFX-CE_CATALASE_3_S_AT, AFFX-CE_CATALASE_5_S_AT, AFFX-CE_CATALASE_M_S_AT, 188687_S_AT	844	3	13633	16.1528	0.99999	0.369844	16.0985
INTERPRO	IPR002226:Catalase	3	0.258176	0.0210745	188587_S_AT, AFFX-CE_CATALASE_3_S_AT, AFFX-CE_CATALASE_5_S_AT, AFFX-CE_CATALASE_M_S_AT, 188687_S_AT	844	4	13633	12.1146	1	0.512276	28.7102
GOTERM_MF_FAT	GO:0004096~catalase activity	3	0.258176	0.0455049	188587_S_AT, AFFX-CE_CATALASE_3_S_AT, AFFX-CE_CATALASE_5_S_AT, AFFX-CE_CATALASE_M_S_AT, 188687_S_AT	487	5	6686	8.23737	1	0.534265	48.2759
KEGG_PATHWAY	cel00680:Methane metabolism	3	0.258176	0.101179	188587_S_AT, AFFX-CE_CATALASE_3_S_AT, AFFX-CE_CATALASE_5_S_AT, AFFX-CE_CATALASE_M_S_AT, 188687_S_AT	123	7	1534	5.34495	0.999885	0.726183	68.2617
COG_ONTOLOGY	Inorganic ion transport and metabolism	3	0.258176	0.482045	188587_S_AT, AFFX-CE_CATALASE_3_S_AT, AFFX-CE_CATALASE_5_S_AT, AFFX-CE_CATALASE_M_S_AT, 188687_S_AT	90	20	1118	1.86333	1	0.942199	99.5461
Annotation Cluster 12	Enrichment Score: 1.4186860541493593
Category	Term	Count	%	PValue	Genes	List Total	Pop Hits	Pop Total	Fold Enrichment	Bonferroni	Benjamini	FDR
GOTERM_BP_FAT	GO:0008286~insulin receptor signaling pathway	3	0.258176	0.0381341	187680_S_AT, 194014_S_AT, 194058_S_AT	519	5	7838	9.06127	1	0.724401	45.4258
GOTERM_BP_FAT	GO:0032869~cellular response to insulin stimulus	3	0.258176	0.0381341	187680_S_AT, 194014_S_AT, 194058_S_AT	519	5	7838	9.06127	1	0.724401	45.4258
GOTERM_BP_FAT	GO:0032868~response to insulin stimulus	3	0.258176	0.0381341	187680_S_AT, 194014_S_AT, 194058_S_AT	519	5	7838	9.06127	1	0.724401	45.4258
GOTERM_BP_FAT	GO:0043434~response to peptide hormone stimulus	3	0.258176	0.0381341	187680_S_AT, 194014_S_AT, 194058_S_AT	519	5	7838	9.06127	1	0.724401	45.4258

## Sheet: DAVID DOWN LET-7 VS LIN-29
Functional Annotation Clustering Tool from DAVID Bioinformatics Resources 6.7 (Huang et al., Nature Protocols 2009;4(1):44-57; Huang et al., NAR 2009;37(1):1-13)
Annotation Cluster 1	Enrichment Score: 3.1533972981071066
Category	Term	Count	%	PValue	Genes	List Total	Pop Hits	Pop Total	Fold Enrichment	Bonferroni	Benjamini	FDR
GOTERM_BP_FAT	GO:0002119~nematode larval development	273	11.8696	0.000652851	174375_AT, 191940_AT, 193842_AT, 174895_AT, 193697_S_AT, 180955_S_AT, 194121_S_AT, 191728_AT, 176156_AT, 192630_AT, 179409_AT, 174511_S_AT, 177684_S_AT, 184720_AT, 173068_AT, 190293_AT, 184947_S_AT, 177139_S_AT, AFFX-CE_UBIQUITIN_5_AT, 192348_S_AT, 174373_S_AT, 173724_AT, 172199_X_AT, 194011_AT, 188115_S_AT, 186622_AT, 193121_AT, 190055_S_AT, 171742_X_AT, 173317_S_AT, 192049_AT, 174181_S_AT, 1787…	1029	1760	7838	1.18152	0.581819	0.353331	1.06409
GOTERM_BP_FAT	GO:0002164~larval development	273	11.8696	0.000679876	174375_AT, 191940_AT, 193842_AT, 174895_AT, 193697_S_AT, 180955_S_AT, 194121_S_AT, 191728_AT, 176156_AT, 192630_AT, 179409_AT, 174511_S_AT, 177684_S_AT, 184720_AT, 173068_AT, 190293_AT, 184947_S_AT, 177139_S_AT, AFFX-CE_UBIQUITIN_5_AT, 192348_S_AT, 174373_S_AT, 173724_AT, 172199_X_AT, 194011_AT, 188115_S_AT, 186622_AT, 193121_AT, 190055_S_AT, 171742_X_AT, 173317_S_AT, 192049_AT, 174181_S_AT, 1787…	1029	1761	7838	1.18085	0.596647	0.261141	1.10791
GOTERM_BP_FAT	GO:0009791~post-embryonic development	275	11.9565	0.000780845	174375_AT, 191940_AT, 193842_AT, 174895_AT, 193697_S_AT, 180955_S_AT, 194121_S_AT, 191728_AT, 176156_AT, 192630_AT, 179409_AT, 174511_S_AT, 177684_S_AT, 184720_AT, 173068_AT, 190293_AT, 184947_S_AT, 177139_S_AT, AFFX-CE_UBIQUITIN_5_AT, 192348_S_AT, 174373_S_AT, 173724_AT, 172199_X_AT, 194011_AT, 188115_S_AT, 186622_AT, 193121_AT, 190055_S_AT, 171742_X_AT, 173317_S_AT, 192049_AT, 174181_S_AT, 1787…	1029	1779	7838	1.17746	0.647546	0.229495	1.27146
Annotation Cluster 2	Enrichment Score: 2.099688414029321
Category	Term	Count	%	PValue	Genes	List Total	Pop Hits	Pop Total	Fold Enrichment	Bonferroni	Benjamini	FDR
SP_PIR_KEYWORDS	basement membrane	6	0.26087	0.00281395	174785_AT, 188908_S_AT, 191389_S_AT, 173049_AT, 190353_S_AT, 174314_AT	2221	10	19674	5.3149	0.604298	0.169244	3.74655
GOTERM_CC_FAT	GO:0044420~extracellular matrix part	6	0.26087	0.00719605	174785_AT, 188908_S_AT, 191389_S_AT, 173049_AT, 190353_S_AT, 174314_AT	892	12	7912	4.43498	0.791369	0.159814	8.7648
GOTERM_CC_FAT	GO:0005604~basement membrane	6	0.26087	0.00719605	174785_AT, 188908_S_AT, 191389_S_AT, 173049_AT, 190353_S_AT, 174314_AT	892	12	7912	4.43498	0.791369	0.159814	8.7648
SP_PIR_KEYWORDS	extracellular matrix	6	0.26087	0.0273994	174785_AT, 188908_S_AT, 191389_S_AT, 173049_AT, 190353_S_AT, 174314_AT	2221	16	19674	3.32181	0.999893	0.366826	31.372
Annotation Cluster 3	Enrichment Score: 1.4590358386034736
Category	Term	Count	%	PValue	Genes	List Total	Pop Hits	Pop Total	Fold Enrichment	Bonferroni	Benjamini	FDR
SP_PIR_KEYWORDS	potassium transport	9	0.391304	0.0126498	175977_S_AT, 189673_AT, 193537_S_AT, 192400_AT, 192221_AT, 176651_S_AT, 191129_S_AT, 193585_AT, 175241_AT	2221	29	19674	2.74909	0.984828	0.243627	15.845
SP_PIR_KEYWORDS	potassium	9	0.391304	0.0322729	175977_S_AT, 189673_AT, 193537_S_AT, 192400_AT, 192221_AT, 176651_S_AT, 191129_S_AT, 193585_AT, 175241_AT	2221	34	19674	2.34481	0.999979	0.374533	35.8881
GOTERM_MF_FAT	GO:0030955~potassium ion binding	9	0.391304	0.102795	175977_S_AT, 189673_AT, 193537_S_AT, 192400_AT, 192221_AT, 176651_S_AT, 191129_S_AT, 193585_AT, 175241_AT	930	35	6686	1.84866	1	0.977244	79.5281
Annotation Cluster 4	Enrichment Score: 1.3811291842111968
Category	Term	Count	%	PValue	Genes	List Total	Pop Hits	Pop Total	Fold Enrichment	Bonferroni	Benjamini	FDR
GOTERM_BP_FAT	GO:0016477~cell migration	17	0.73913	0.0250288	192793_S_AT, 174553_AT, 187928_AT, 176624_AT, 174314_AT, 175965_AT, 192185_AT, 174785_AT, 187892_AT, 179252_AT, 177274_S_AT, 194252_X_AT, 187890_AT, 171944_X_AT, 183339_AT, 192049_AT, 173426_AT	1029	73	7838	1.77385	1	0.741678	33.9803
GOTERM_BP_FAT	GO:0051674~localization of cell	17	0.73913	0.0535903	192793_S_AT, 174553_AT, 187928_AT, 176624_AT, 174314_AT, 175965_AT, 192185_AT, 174785_AT, 187892_AT, 179252_AT, 177274_S_AT, 194252_X_AT, 187890_AT, 171944_X_AT, 183339_AT, 192049_AT, 173426_AT	1029	80	7838	1.61863	1	0.86294	59.4351
GOTERM_BP_FAT	GO:0048870~cell motility	17	0.73913	0.0535903	192793_S_AT, 174553_AT, 187928_AT, 176624_AT, 174314_AT, 175965_AT, 192185_AT, 174785_AT, 187892_AT, 179252_AT, 177274_S_AT, 194252_X_AT, 187890_AT, 171944_X_AT, 183339_AT, 192049_AT, 173426_AT	1029	80	7838	1.61863	1	0.86294	59.4351
